# Supplementary material for: Palladium-catalyzed Csp2–H carbonylation of aromatic oximes: selective access to benzo[d][1,2]oxazin-1-ones and 3-methyleneisoindolin-1-ones
Source: Royal Society of Chemistry journal article supplement (doi:10.1039/c5cc01661d), 2015-01-01

# **Palladium-Catalyzed $Csp^2$ -H Carbonylation of Aromatic Oximes: Selective Access to Benzo[d][1,2]oxazin-1-ones and 3-Methyleneisoindolin-1-ones\***

Yanli Xu, Weigao Hu, Xiaodong Tang, Jinwu Zhao, Wanqing Wu, and Huanfeng Jiang\*

School of Chemistry and Chemical Engineering, South China University of  
Technology, Guangzhou 510640, P. R. China

[jianghf@scut.edu.cn](mailto:jianghf@scut.edu.cn)

## **Supporting Information**

### **List of Contents**

|                                                                                |              |
|--------------------------------------------------------------------------------|--------------|
| <b>General Information.....</b>                                                | <b>S1</b>    |
| <b>General Procedure for Oximes.....</b>                                       | <b>S1</b>    |
| <b>The Optimization of Reaction Conditions.....</b>                            | <b>S1-S3</b> |
| <b>General Procedure for the Preparation of 2-4.....</b>                       | <b>S4</b>    |
| <b>The KIE Experiments for the Synthesis of 2b/2b'.....</b>                    | <b>S5</b>    |
| <b>The X-ray Crystal Structure of (Z)-3-Ethylideneisoindolin-1-one 3a.....</b> | <b>S5</b>    |
| <b>Analytical Data for All Compounds.....</b>                                  | <b>S5-</b>   |
| <b>S18</b>                                                                     |              |
| <b>NMR Spectra for All Compounds.....</b>                                      | <b>S19-</b>  |
| <b>S53</b>                                                                     |              |
| <b>MS Spectra for 2m.....</b>                                                  | <b>S54</b>   |
| <b>The <sup>1</sup>H NMR for 2b/2b'.....</b>                                   | <b>S54</b>   |

## General Information

Solvents and all reagents were used as received.  $^1\text{H}$  NMR and  $^{13}\text{C}$  NMR spectra were recorded in  $\text{CDCl}_3$  or  $\text{DMSO-d}_6$  at 400 MHz NMR spectrometer. The chemical shifts ( $\delta$ ) were referenced to TMS. GC-MS was obtained using electron ionization (EI). IR spectra were obtained as potassium bromide pellets or as liquid films between two potassium bromide pellets with a Bruker Vector 22 spectrometer. Melting points were measured with a micro melting point apparatus. TLC was performed using commercially prepared 100-400 mesh silica gel plates ( $\text{GF}_{254}$ ), and visualization was effected at 254 nm. High-resolution mass spectra (ESI) were obtained with a LCMS-IT-TOF mass spectrometer.

## General Procedure for Oximes

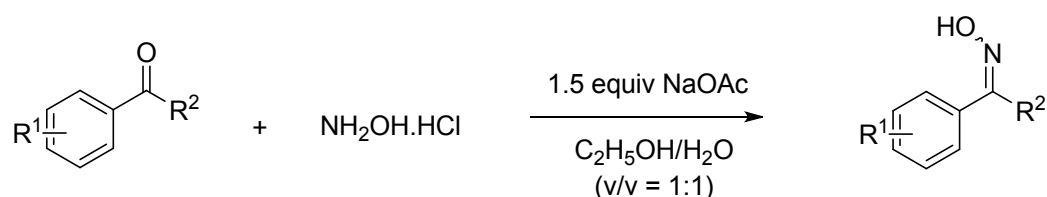

To a solution of aromatic ketones or aromatic aldehydes (3.0 mmol) in the mixture of  $\text{C}_2\text{H}_5\text{OH}/\text{H}_2\text{O}$  (v/v = 1:1) was added hydroxylamine hydrochloride (3.6 mmol), NaOAc (4.5 mmol) in one portion, and the reaction mixture was stirred at 100 °C (when the substrates are aromatic ketones) or at room temperature (when the substrates are aromatic aldehydes) for 6-8 h. Upon completion of the reaction as indicated by TLC, the reaction mixture was diluted with water, extracted with ethyl acetate, and dried over anhydrous  $\text{Na}_2\text{SO}_4$ . The solvent was removed under reduced pressure to give oximes.

## The Optimization of Reaction Conditions

Table S1. Optimization of Reaction Conditions to 2a and 3a<sup>[a]</sup>

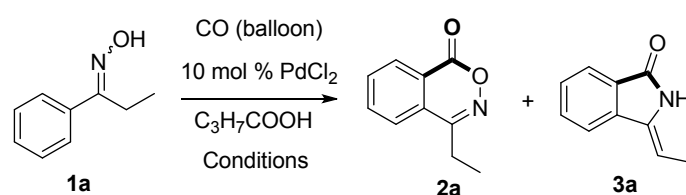

| Entry | Oxidant               | Base | Temp (°C) | Yield (%) |    |
|-------|-----------------------|------|-----------|-----------|----|
|       |                       |      |           | 2a        | 3a |
| 1     | -                     | -    | 100       | 28        | <5 |
| 2     | $\text{Ag}_2\text{O}$ | -    | 100       | 37        | nd |
| 3     | $\text{AgNO}_3$       | -    | 100       | 33        | nd |
| 4     | $\text{AgCl}$         | -    | 100       | 56        | nd |
| 5     | $\text{AgOAc}$        | -    | 100       | 66        | nd |
| 6     | $\text{CuCl}_2$       | -    | 100       | nd        | nd |
| 7     | $\text{Cu(OAc)}_2$    | -    | 100       | nd        | nd |
| 8     | DDQ                   | -    | 100       | nd        | nd |
| 9     | BQ                    | -    | 100       | nd        | nd |

|    |                       |                                 |     |    |         |
|----|-----------------------|---------------------------------|-----|----|---------|
| 10 | PhI(OAc) <sub>2</sub> | -                               | 100 | nd | nd      |
| 11 | -                     | -                               | 120 | nd | 40      |
| 12 | -                     | Li <sub>2</sub> CO <sub>3</sub> | 120 | nd | 38      |
| 13 | -                     | Na <sub>2</sub> CO <sub>3</sub> | 120 | nd | 43      |
| 14 | -                     | K <sub>2</sub> CO <sub>3</sub>  | 120 | nd | 80 (73) |
| 15 | -                     | Cs <sub>2</sub> CO <sub>3</sub> | 120 | nd | 64      |
| 16 | -                     | NaOAc                           | 120 | nd | 37      |
| 17 | -                     | KOAc                            | 120 | nd | 32      |

<sup>[a]</sup> Reaction conditions: unless otherwise noted, all reactions were performed with **1a** (0.5 mmol), PdCl<sub>2</sub> (10 mol %), oxidant (1.0 mmol) or base (0.25 mmol) in C<sub>3</sub>H<sub>7</sub>COOH (2.0 mL) for 48 h. Determined by GC using dodecane as the internal standard. Data in parentheses is the yield of isolated product.

**Table S2. Optimization of Different Solvents for 2a<sup>[a]</sup>**

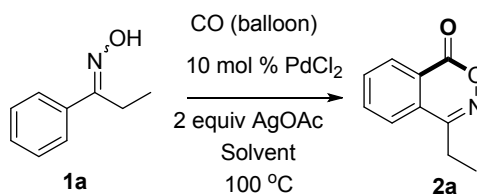

| Entry            | Solvent                                                                                              | Yield (%) |
|------------------|------------------------------------------------------------------------------------------------------|-----------|
| 1                | DMF                                                                                                  | 10        |
| 2                | toluene                                                                                              | <5        |
| 3                | 1,4-dioxane                                                                                          | nd        |
| 4 <sup>[b]</sup> | DCE                                                                                                  | nd        |
| 5 <sup>[b]</sup> | DCM                                                                                                  | nd        |
| 6 <sup>[b]</sup> | CH <sub>3</sub> CN                                                                                   | <5        |
| 7                | C <sub>3</sub> H <sub>7</sub> COOH                                                                   | 66        |
| 8                | C <sub>3</sub> H <sub>7</sub> COOH/(C <sub>3</sub> H <sub>7</sub> CO) <sub>2</sub> O<br>(v/v) = 20:1 | 79 (74)   |

<sup>[a]</sup> Reaction conditions: unless otherwise noted, all reactions were performed with **1a** (0.5 mmol), PdCl<sub>2</sub> (10 mol %), AgOAc (1.0 mmol) in solvent (2.0 mL) at 100 °C for 48 h. Determined by GC using dodecane as the internal standard. Data in parentheses is the yield of isolated product. <sup>[b]</sup> The reaction was carried out in 25 mL Schlenk-type sealed tube.

**Table S3. Optimization of Different Pd-catalysts for 2a<sup>[a]</sup>**

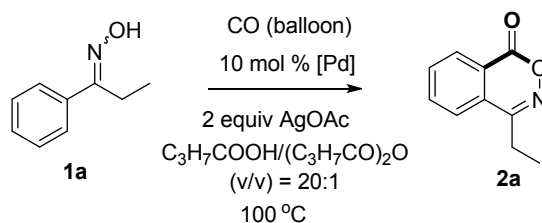

| Entry | [Pd]                                               | Yield (%) |
|-------|----------------------------------------------------|-----------|
| 1     | Pd(OAc) <sub>2</sub>                               | 22        |
| 2     | Pd(PPh <sub>3</sub> ) <sub>2</sub> Cl <sub>2</sub> | <10       |
| 3     | Pd(TFA) <sub>2</sub>                               | 19        |

|   |                                    |         |
|---|------------------------------------|---------|
| 4 | Pd(PPh <sub>3</sub> ) <sub>4</sub> | nd      |
| 5 | Pd <sub>2</sub> dba <sub>3</sub>   | <5      |
| 6 | PdCl <sub>2</sub>                  | 79 (74) |

<sup>[a]</sup> Reaction conditions: unless otherwise noted, all reactions were performed with **1a** (0.5 mmol), Pd-catalyst (10 mol %), AgOAc (1.0 mmol) in a mixture of C<sub>3</sub>H<sub>7</sub>COOH/(C<sub>3</sub>H<sub>7</sub>CO)<sub>2</sub>O (v/v) = 20:1 (2.0 mL) 100 °C for 48 h. Determined by GC using dodecane as the internal standard. Data in parentheses is the yield of isolated product.

**Table S4. Optimization of Different Solvents for 3a<sup>[a]</sup>**

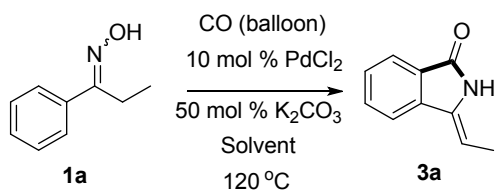

| Entry            | Solvent                            | Yield (%) |
|------------------|------------------------------------|-----------|
| 1 <sup>[b]</sup> | HOAc                               | nd        |
| 2 <sup>[b]</sup> | CH <sub>3</sub> CN                 | nd        |
| 3 <sup>[b]</sup> | toluene                            | 61        |
| 4                | DMF                                | nd        |
| 5                | DMSO                               | nd        |
| 6                | C <sub>3</sub> H <sub>7</sub> COOH | 80 (73)   |

<sup>[a]</sup> Reaction conditions: unless otherwise noted, all reactions were performed with **1a** (0.5 mmol), PdCl<sub>2</sub> (10 mol %), K<sub>2</sub>CO<sub>3</sub> (0.25 mmol) in solvent (2.0 mL) at 120 °C for 48 h. Determined by GC using dodecane as the internal standard. Data in parentheses is the yield of isolated product. <sup>[b]</sup> The reaction was carried out in 25 mL Schlenk-type sealed tube.

**Table S5. Optimization of Different Pd-catalysts for 3a<sup>[a]</sup>**

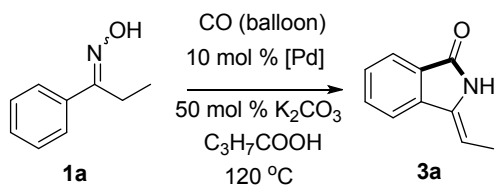

| Entry | [Pd]                                               | Yield (%) |
|-------|----------------------------------------------------|-----------|
| 1     | Pd(OAc) <sub>2</sub>                               | 32        |
| 2     | Pd(PPh <sub>3</sub> ) <sub>2</sub> Cl <sub>2</sub> | nd        |
| 3     | Pd(TFA) <sub>2</sub>                               | 28        |
| 4     | Pd(PPh <sub>3</sub> ) <sub>4</sub>                 | nd        |
| 5     | Pd <sub>2</sub> dba <sub>3</sub>                   | 15        |
| 6     | PdCl <sub>2</sub>                                  | 80 (73)   |

<sup>[a]</sup> Reaction conditions: unless otherwise noted, all reactions were performed with **1a** (0.5 mmol), Pd-catalyst (10 mol %), K<sub>2</sub>CO<sub>3</sub> (0.25 mmol) in C<sub>3</sub>H<sub>7</sub>COOH (2.0 mL) at 120 °C for 48 h. Determined by GC using dodecane as the internal standard. Data in parentheses is the yield of isolated product.

## General Procedure for Benzo[d][1,2]oxazin-1-ones 2

Under air atmosphere, oxime **1** (0.5 mmol), PdCl<sub>2</sub> (10 mol %), AgOAc (1.0 mmol), and 2.0 mL of *n*-C<sub>3</sub>H<sub>7</sub>COOH/(*n*-C<sub>3</sub>H<sub>7</sub>CO)<sub>2</sub>O (v/v = 20:1) were added to a tube equipped with magnetic stirrer bar. Then the tube was charged with CO (1 atm), and was stirred at 100 °C (oil bath temperature). After the reaction was finished (monitored by TLC), the crude product was cooled to room temperature and quenched with aqueous NaHCO<sub>3</sub>, and the crude product was extracted with ethyl acetate. The organic extracts were concentrated in vacuum, and the resulting residue was purified by column chromatography on silica gel with light petroleum ether/ethyl acetate as eluent to afford the desired product **2**.

## General Procedure for the Preparation of 3

Oxime **1** (0.5 mmol), PdCl<sub>2</sub> (10 mol %), K<sub>2</sub>CO<sub>3</sub> (0.25 mmol), and 2.0 mL of *n*-C<sub>3</sub>H<sub>7</sub>COOH were added to a tube equipped with magnetic stirrer bar. Then the tube was charged with CO (1 atm), and was stirred at 120 °C (oil bath temperature). After the reaction was finished (monitored by TLC), the crude product was cooled to room temperature and quenched with aqueous NaOH, and the crude product was extracted with ethyl acetate. The organic extracts were concentrated in vacuum, and the resulting residue was purified by column chromatography on silica gel with light petroleum ether/ethyl acetate as eluent to afford the desired product **3**.

## General Procedure for the Preparation of 4

Compound **3a** (0.3 mmol), 4-iodopyridine (1.5 mmol), CuI (0.06 mmol), K<sub>2</sub>CO<sub>3</sub> (0.9 mmol), DMF (2 mL), were added to a 25-mL Schlenk-type sealed tube equipped with a magnetic stirrer and septum. The tube was evacuated and purged with nitrogen gas three times. And the reaction mixture was stirred at 150 °C for 48 h. Upon completion of the reaction as indicated by TLC, the reaction mixture was diluted with water, extracted with ethyl acetate, and dried over anhydrous Na<sub>2</sub>SO<sub>4</sub>. The solvent was removed under reduced pressure and the resulting residue was purified by column chromatography on silica gel with light petroleum ether/ethyl acetate as eluent to afford the desired product **4**.

## The KIE Experiments for the Synthesis of 2b/2b'

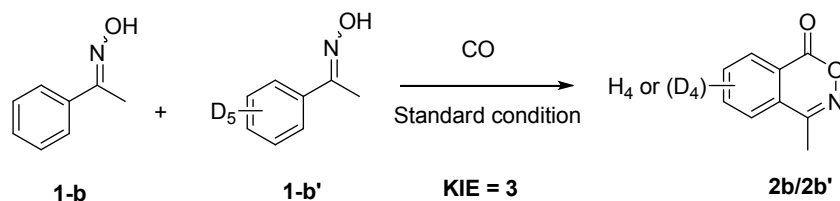

Under air atmosphere, oxime **1-b** (0.25 mmol), oxime **1-b'** (0.25 mmol), PdCl<sub>2</sub> (10 mol %), AgOAc (1.0 mmol), and 2.0 mL of *n*-C<sub>3</sub>H<sub>7</sub>COOH/(*n*-BuO)<sub>2</sub>O (v/v = 20:1) were added to a tube

equipped with magnetic stirrer bar. Then the tube was charged with CO (1 atm), and was stirred at 100 °C (oil bath temperature) for 12 h. The crude product was cooled to room temperature and quenched with aqueous NaHCO<sub>3</sub>, then extracted with ethyl acetate. The organic extracts were concentrated in vacuum, and the resulting residue was purified by column chromatography on silica gel with light petroleum ether/ethyl acetate as eluent to afford the desired products **2b/2b'**, detected by <sup>1</sup>H NMR.

Compounds **2b/2b'**, <sup>1</sup>H NMR (400 MHz, CDCl<sub>3</sub>) δ 8.38 (d, *J* = 7.7 Hz, 1H), 7.94 (t, *J* = 7.6 Hz, 1H), 7.86 (t, *J* = 7.5 Hz, 1H), **7.69 (d, *J* = 6.7 Hz, 1.5H)**, 2.58 (s, 6H).

Compound **2b**, <sup>1</sup>H NMR (400 MHz, CDCl<sub>3</sub>) δ 8.35 (d, *J* = 7.7 Hz, 2H), 7.94 (t, *J* = 7.6 Hz, 2H), 7.85 (t, *J* = 7.6 Hz, 2H), **7.69 (d, *J* = 7.8 Hz, 2H)**, 2.57 (s, 6H).

KIE = K<sub>H</sub>/K<sub>D</sub> = 1.5/(2-1.5) = 3.

### The X-ray Crystal Structure of (*Z*)-3-Ethylideneisoindolin-1-one **3a**

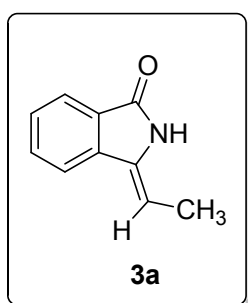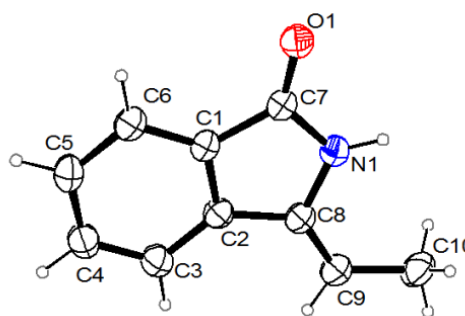

### Analytical Data for All Compounds

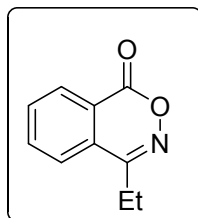

**4-Ethyl-1H-benzo[d][1,2]oxazin-1-one (2a).** Pale yellow solid, m.p. 115-116 °C. <sup>1</sup>H NMR (400 MHz, CDCl<sub>3</sub>) δ 8.40 (d, *J* = 7.8 Hz, 1H), 7.93 (t, *J* = 7.7 Hz, 1H), 7.85 (t, *J* = 7.6 Hz, 1H), 7.73 (d, *J* = 7.9 Hz, 1H), 3.00 (q, *J* = 7.4 Hz, 2H), 1.40 (t, *J* = 7.4 Hz, 3H). <sup>13</sup>C NMR (100 MHz, CDCl<sub>3</sub>) δ 163.8, 156.5, 135.3, 133.4, 128.9, 126.9, 124.7, 122.7, 24.2, 11.7. IR (KBr): 3054, 2922, 2851, 1726, 1643, 1559, 1455, 1283, 1249, 1089, 1024, 911, 758, 688 cm<sup>-1</sup>. <sup>1</sup>. ESI-HRMS calcd for C<sub>10</sub>H<sub>10</sub>NO<sub>2</sub> [M+H]<sup>+</sup> 176.0706, found 176.0703.

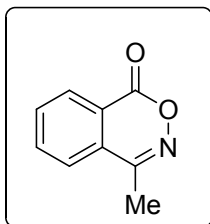

**4-Methyl-1H-benzo[d][1,2]oxazin-1-one (2b).** Pale yellow solid, m.p. 158-159 °C.  $^1\text{H}$  NMR (400 MHz,  $\text{CDCl}_3$ )  $\delta$  8.35 (d,  $J = 7.7$  Hz, 1H), 7.94 (t,  $J = 7.6$  Hz, 1H), 7.85 (t,  $J = 7.6$  Hz, 1H), 7.69 (d,  $J = 7.8$  Hz, 1H), 2.57 (s, 3H).  $^{13}\text{C}$  NMR (100 MHz,  $\text{CDCl}_3$ )  $\delta$  163.7, 153.2, 135.5, 133.6, 128.6, 127.4, 125.2, 122.3, 16.6. IR (KBr): 3064, 2925, 2855, 1695, 1609, 1556, 1433, 1379, 1252, 1090, 1012, 899, 759, 683  $\text{cm}^{-1}$ . ESI-HRMS calcd for  $\text{C}_9\text{H}_8\text{NO}_2$   $[\text{M}+\text{H}]^+$  162.0550, found 162.0550.

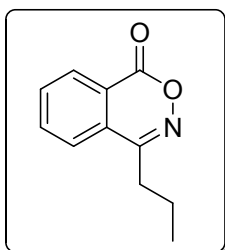

**4-Propyl-1H-benzo[d][1,2]oxazin-1-one (2c).** Pale yellow solid, m.p. 64-65 °C.  $^1\text{H}$  NMR (400 MHz,  $\text{CDCl}_3$ )  $\delta$  8.39 (d,  $J = 7.8$  Hz, 1H), 7.93 (t,  $J = 7.6$  Hz, 1H), 7.84 (t,  $J = 7.6$  Hz, 1H), 7.72 (d,  $J = 7.9$  Hz, 1H), 2.92 (t,  $J = 8.0$  Hz, 2H), 1.88-1.78 (m, 2H), 1.07 (t,  $J = 7.4$  Hz, 3H).  $^{13}\text{C}$  NMR (100 MHz,  $\text{CDCl}_3$ )  $\delta$  163.8, 155.7, 135.3, 133.4, 128.8, 126.9, 124.9, 122.7, 32.4, 20.8, 13.8. IR (KBr): 3054, 2969, 2877, 1740, 1602, 1566, 1461, 1251, 1102, 1023, 916, 739, 685  $\text{cm}^{-1}$ . ESI-HRMS calcd for  $\text{C}_{11}\text{H}_{12}\text{NO}_2$   $[\text{M}+\text{H}]^+$  190.0863, found 190.0866.

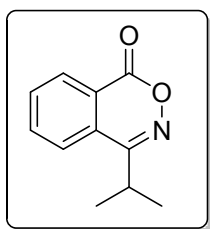

**4-Isopropyl-1H-benzo[d][1,2]oxazin-1-one (2d).**<sup>[1]</sup> Pale yellow solid, m.p. 79-80°C.  $^1\text{H}$  NMR (400 MHz,  $\text{CDCl}_3$ )  $\delta$  8.38 (d,  $J = 7.8$  Hz, 1H), 7.93 (t,  $J = 7.6$  Hz, 1H), 7.82 (t,  $J = 7.6$  Hz, 1H), 7.78 (d,  $J = 8.0$  Hz, 1H), 3.61-3.30 (m, 1H), 1.41 (d,  $J = 6.8$  Hz, 6H).  $^{13}\text{C}$  NMR (100 MHz,  $\text{CDCl}_3$ )  $\delta$  163.7, 159.2, 135.3, 133.2, 128.9, 126.5, 124.5, 122.7, 29.8, 20.7. IR (KBr): 3074, 2978, 2875, 1727, 1598, 1461, 1384, 1281, 1105, 1022, 912, 738, 691  $\text{cm}^{-1}$ . MS (EI)  $m/z$ : 189, 174, 159, 130, 115, 77.

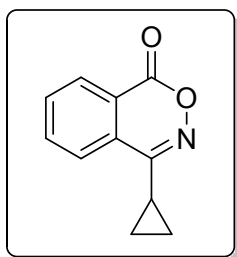

**4-Cyclopropyl-1H-benzo[d][1,2]oxazin-1-one (2e).** Pale yellow solid, m.p. 94-95 °C. <sup>1</sup>H NMR (400 MHz, CDCl<sub>3</sub>) δ 8.33 (d, *J* = 7.7 Hz, 1H), 8.03 (d, *J* = 7.8 Hz, 1H), 7.95 (t, *J* = 7.5 Hz, 1H), 7.84 (t, *J* = 7.4 Hz, 1H), 2.20-2.10 (m, 1H), 1.08 (d, *J* = 9.6 Hz, 4H). <sup>13</sup>C NMR (100 MHz, CDCl<sub>3</sub>) δ 163.8, 156.0, 135.4, 133.4, 128.5, 128.0, 125.0, 122.0, 10.6, 6.1. IR (KBr): 3012, 2924, 2853, 1734, 1599, 1557, 1454, 1390, 1280, 1058, 1022, 732, 688 cm<sup>-1</sup>. ESI-HRMS calcd for C<sub>11</sub>H<sub>10</sub>NO<sub>2</sub> [M+H]<sup>+</sup> 188.0706, found 188.0710.

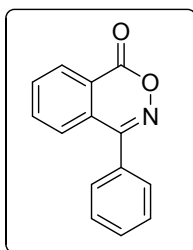

**4-Phenyl-1H-benzo[d][1,2]oxazin-1-one (2f).** Pale yellow solid, m.p. 149-150 °C. <sup>1</sup>H NMR (400 MHz, CDCl<sub>3</sub>) δ 8.50-8.42 (m, 1H), 7.90-7.83 (m, 2H), 7.62-7.54 (m, 6H). <sup>13</sup>C NMR (100 MHz, CDCl<sub>3</sub>) δ 163.5, 157.2, 135.3, 133.8, 131.1, 130.4, 129.3, 128.9, 128.8, 127.5, 127.3, 122.9. IR (KBr): 3059, 2924, 2853, 1734, 1603, 1450, 1386, 1346, 1284, 1245, 1109, 1054, 907, 692 cm<sup>-1</sup>. ESI-HRMS calcd for C<sub>14</sub>H<sub>10</sub>NO<sub>2</sub> [M+H]<sup>+</sup> 224.0706, found 224.0711.

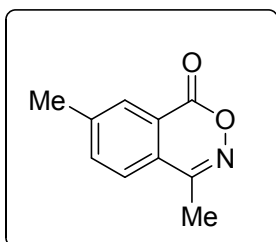

**4,7-Dimethyl-1H-benzo[d][1,2]oxazin-1-one (2g).** Pale yellow solid, m.p. 120-121 °C. <sup>1</sup>H NMR (400 MHz, CDCl<sub>3</sub>) δ 8.09 (s, 1H), 7.70 (d, *J* = 8.0 Hz, 1H), 7.55 (d, *J* = 8.0 Hz, 1H), 2.51 (s, 6H). <sup>13</sup>C NMR (100 MHz, CDCl<sub>3</sub>) δ 164.0, 153.1, 144.8, 136.4, 128.3, 125.2, 124.9, 122.0, 21.7, 16.5. IR (KBr): 3079, 2925, 2855, 1728, 1610, 1441, 1382, 1336, 1280, 1100, 1048, 836, 743 cm<sup>-1</sup>. ESI-HRMS calcd for C<sub>10</sub>H<sub>10</sub>NO<sub>2</sub> [M+H]<sup>+</sup> 176.0706, found 176.0713.



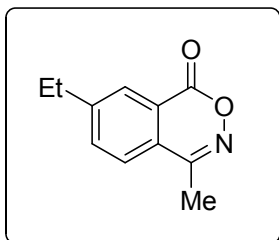

**7-Ethyl-4-methyl-1H-benzo[d][1,2]oxazin-1-one (2h).** Pale yellow solid, m.p. 117-118 °C.  $^1\text{H}$  NMR (400 MHz,  $\text{CDCl}_3$ )  $\delta$  8.12 (s, 1H), 7.73 (d,  $J = 7.8$  Hz, 1H), 7.58 (d,  $J = 7.8$  Hz, 1H), 2.80 (q,  $J = 7.2$  Hz, 2H), 2.51 (s, 3H), 1.27 (t,  $J = 7.2$  Hz, 3H).  $^{13}\text{C}$  NMR (100 MHz,  $\text{CDCl}_3$ )  $\delta$  164.1, 153.1, 150.9, 135.4, 127.1, 125.3, 125.1, 122.1, 28.9, 16.5, 14.8. IR (KBr): 3053, 2968, 2896, 1726, 1607, 1561, 1501, 1436, 1340, 1247, 1105, 1021, 903, 857, 755  $\text{cm}^{-1}$ . ESI-HRMS calcd for  $\text{C}_{11}\text{H}_{12}\text{NO}_2$   $[\text{M}+\text{H}]^+$  190.0863, found 190.0861.

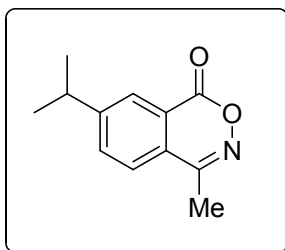

**7-Isopropyl-4-methyl-1H-benzo[d][1,2]oxazin-1-one (2i).** Yellow oil.  $^1\text{H}$  NMR (400 MHz,  $\text{CDCl}_3$ )  $\delta$  8.14 (s, 1H), 7.76 (d,  $J = 8.0$  Hz, 1H), 7.60 (d,  $J = 8.0$  Hz, 1H), 3.09-3.00 (m, 1H), 2.50 (s, 3H), 1.27 (d,  $J = 6.9$  Hz, 6H).  $^{13}\text{C}$  NMR (100 MHz,  $\text{CDCl}_3$ )  $\delta$  164.1, 155.5, 153.0, 134.2, 125.7, 125.4, 125.2, 122.1, 34.3, 23.3, 16.4. IR (KBr): 3073, 2966, 2876, 1725, 1609, 1562, 1501, 1433, 1340, 1247, 1102, 1011, 903, 858, 755  $\text{cm}^{-1}$ . ESI-HRMS calcd for  $\text{C}_{12}\text{H}_{14}\text{NO}_2$   $[\text{M}+\text{H}]^+$  204.1019, found 204.1015.

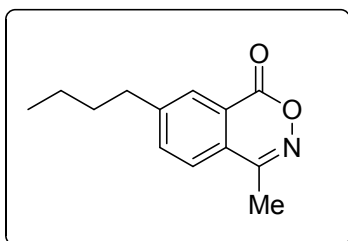

**7-Butyl-4-methyl-1H-benzo[d][1,2]oxazin-1-one (2j).** Pale yellow solid, m.p. 69-70 °C.  $^1\text{H}$  NMR (400 MHz,  $\text{CDCl}_3$ )  $\delta$  8.10 (s, 1H), 7.71 (d,  $J = 8.1$  Hz, 1H), 7.58 (d,  $J = 8.1$  Hz, 1H), 2.76 (t,  $J = 7.7$  Hz, 2H), 2.51 (s, 3H), 1.67-1.58 (m, 2H), 1.32 (dt,  $J = 14.5, 7.4$  Hz, 2H), 0.89 (t,  $J = 7.3$  Hz, 3H).  $^{13}\text{C}$  NMR (100 MHz,  $\text{CDCl}_3$ )  $\delta$  164.1, 153.1, 149.7, 135.8, 127.7, 125.2, 125.1, 122.0, 35.6, 32.9, 22.1, 16.5, 13.7. IR (KBr): 3056, 2958, 2865, 1734,

1611, 1562, 1430, 1379, 1335, 1290, 1102, 1052, 912, 839, 783, 752, 698  $\text{cm}^{-1}$ ; ESI-HRMS calcd for  $\text{C}_{13}\text{H}_{16}\text{NO}_2$   $[\text{M}+\text{H}]^+$  218.1176, found 218.1173.

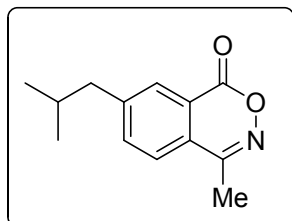

**7-Isobutyl-4-methyl-1H-benzo[d][1,2]oxazin-1-one (2k).** Pale yellow oil.  $^1\text{H}$  NMR (400 MHz,  $\text{CDCl}_3$ )  $\delta$  8.05 (s, 1H), 7.67 (d,  $J = 8.0$  Hz, 1H), 7.58 (d,  $J = 8.1$  Hz, 1H), 2.61 (d,  $J = 7.1$  Hz, 2H), 2.50 (s, 3H), 1.90 (m, 1H), 0.87 (s, 3H), 0.85 (s, 3H).  $^{13}\text{C}$  NMR (100 MHz,  $\text{CDCl}_3$ )  $\delta$  164.0, 153.0, 148.5, 136.4, 128.3, 125.1, 125.0, 121.9, 45.1, 29.9, 22.0, 16.4. IR (KBr): 3056, 2959, 2871, 1737, 1610, 1562, 1504, 1461, 1431, 1172, 1101, 1051, 913, 849, 785, 697, 613  $\text{cm}^{-1}$ ; ESI-HRMS calcd for  $\text{C}_{13}\text{H}_{16}\text{NO}_2$   $[\text{M}+\text{H}]^+$  218.1176, found 218.1175.

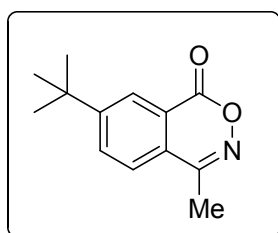

**7-(tert-Butyl)-4-methyl-1H-benzo[d][1,2]oxazin-1-one (2l).** Pale yellow solid, m.p. 157-158  $^\circ\text{C}$   $^1\text{H}$  NMR (400 MHz,  $\text{CDCl}_3$ )  $\delta$  8.35 (s, 1H), 7.95 (d,  $J = 8.3$  Hz, 1H), 7.63 (d,  $J = 8.3$  Hz, 1H), 2.54 (s, 3H), 1.38 (s, 9H).  $^{13}\text{C}$  NMR (100 MHz,  $\text{CDCl}_3$ )  $\delta$  164.4, 158.0, 153.1, 133.0, 125.1, 125.0, 124.9, 122.0, 35.6, 30.91, 16.6. IR (KBr): 3059, 2922, 2855, 1722, 1610, 1445, 1389, 1346, 1282, 1105, 1038, 838, 749  $\text{cm}^{-1}$ . ESI-HRMS calcd for  $\text{C}_{13}\text{H}_{16}\text{NO}_2$   $[\text{M}+\text{H}]^+$  218.1176, found 218.1173.

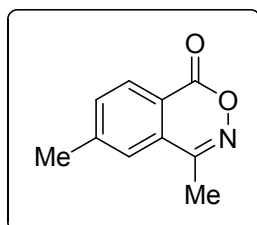

**4,6-Dimethyl-1H-benzo[d][1,2]oxazin-1-one (2n).** Pale yellow solid, m.p. 131-132  $^\circ\text{C}$ .  $^1\text{H}$  NMR (400 MHz,  $\text{CDCl}_3$ )  $\delta$  8.20 (d,  $J = 8.0$  Hz, 1H), 7.62 (d,  $J = 8.0$  Hz, 1H), 7.44 (s, 1H), 2.56 (s, 3H), 2.53 (s, 3H).  $^{13}\text{C}$  NMR (100 MHz,  $\text{CDCl}_3$ )  $\delta$  163.8, 153.1, 146.9, 134.7, 128.5, 127.5, 125.2, 119.7, 22.1, 16.6. IR (KBr): 3056, 2924, 2854,

1734, 1598, 1501, 1437, 1380, 1338, 1289, 1092, 1010, 898, 771, 687  $\text{cm}^{-1}$ . ESI-HRMS calcd for  $\text{C}_{10}\text{H}_{10}\text{NO}_2$   $[\text{M}+\text{H}]^+$  176.0706, found 176.0704.

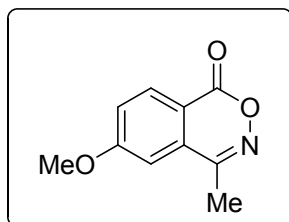

**6-Methoxy-4-methyl-1H-benzo[d][1,2]oxazin-1-one (2o).** White solid, m.p. 140-141  $^{\circ}\text{C}$ .  $^1\text{H}$  NMR (400 MHz,  $\text{CDCl}_3$ )  $\delta$  8.28 (d,  $J = 8.8$  Hz, 1H), 7.32 (d,  $J = 8.8$  Hz, 1H), 7.01 (s, 1H), 3.97 (s, 3H), 2.53 (s, 3H).  $^{13}\text{C}$  NMR (100 MHz,  $\text{CDCl}_3$ )  $\delta$  165.1, 163.6, 153.0, 131.1, 129.6, 120.3, 115.2, 108.7, 56.0, 16.8. IR (KBr): 3029, 2923, 2851, 1717, 1647, 1612, 1486, 1384, 1265, 1097, 1026, 824, 758  $\text{cm}^{-1}$ . ESI-HRMS calcd for  $\text{C}_{10}\text{H}_{10}\text{NO}_3$   $[\text{M}+\text{H}]^+$  192.0655, found 192.0654.

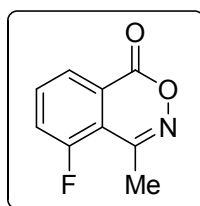

**5-Fluoro-4-methyl-1H-benzo[d][1,2]oxazin-1-one (2p).** Pale yellow solid, m.p. 124-125  $^{\circ}\text{C}$ .  $^1\text{H}$  NMR (400 MHz,  $\text{CDCl}_3$ )  $\delta$  8.22 (d,  $J = 7.8$  Hz, 1H), 7.85 (td,  $J = 8.0, 5.0$  Hz, 1H), 7.69-7.57 (m, 1H), 2.68 (d,  $J_{\text{F-H}} = 6.4$  Hz, 3H).  $^{13}\text{C}$  NMR (100 MHz,  $\text{CDCl}_3$ )  $\delta$  162.3, 159.4, 156.8, 150.6, 135.2, 124.9, 123.7, 123.0, 116.2, 20.3. IR (KBr): 3054, 2923, 2851, 1742, 1605, 1464, 1384, 1287, 1100, 1012, 891, 761  $\text{cm}^{-1}$ . ESI-HRMS calcd for  $\text{C}_9\text{H}_6\text{FNNaO}_2$   $[\text{M}+\text{Na}]^+$  202.0275, found 202.0272.

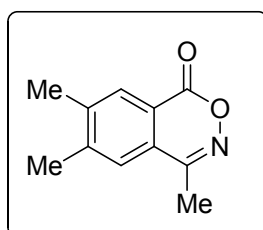

**4,6,7-Trimethyl-1H-benzo[d][1,2]oxazin-1-one (2q).** Pale yellow solid, m.p. 181-182  $^{\circ}\text{C}$ .  $^1\text{H}$  NMR (400 MHz,  $\text{CDCl}_3$ )  $\delta$  8.04 (s, 1H), 7.38 (s, 1H), 2.51 (s, 3H), 2.45 (s, 3H), 2.42 (s, 3H).  $^{13}\text{C}$  NMR (100 MHz,  $\text{CDCl}_3$ )  $\delta$  164.1, 153.0, 145.8, 143.8, 128.8, 125.8, 125.4, 120.0, 20.5, 20.1, 16.6. IR (KBr): 3066, 2925, 2856, 1730, 1605, 1566, 1500, 1436, 1383, 1342, 1258, 1103, 1020, 978, 902, 824, 769  $\text{cm}^{-1}$ . ESI-HRMS calcd for  $\text{C}_{11}\text{H}_{12}\text{NO}_2$   $[\text{M}+\text{H}]^+$

190.0863, found 190.0861.

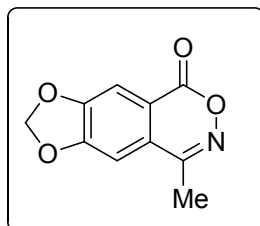

**8-Methyl-5H-[1,3]dioxolo[4',5':4,5]benzo[1,2-d][1,2]oxazin-5-one (2r).** Pale yellow solid, m.p. 188-189 °C. <sup>1</sup>H NMR (400 MHz, CDCl<sub>3</sub>) δ 7.66 (s, 1H), 7.00 (s, 1H), 6.21 (s, 2H), 2.50 (s, 3H). <sup>13</sup>C NMR (100 MHz, CDCl<sub>3</sub>) δ 163.7, 153.9, 152.3, 152.1, 124.5, 118.5, 107.0, 103.9, 103.1, 17.0. IR (KBr): 3058, 2921, 2851, 1728, 1640, 1607, 1493, 1423, 1319, 1271, 1079, 1032, 987, 910, 741 cm<sup>-1</sup>. ESI-HRMS calcd for C<sub>10</sub>H<sub>8</sub>NO<sub>4</sub> [M+H]<sup>+</sup> 206.0448, found 206.0447.

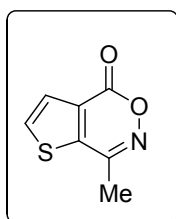

**7-Methyl-4H-thieno[2,3-d][1,2]oxazin-4-one (2s).**<sup>[1]</sup> Pale yellow solid, m.p. 88-89 °C. <sup>1</sup>H NMR (400 MHz, CDCl<sub>3</sub>) δ 7.78 (d, *J* = 5.1 Hz, 1H), 7.73 (d, *J* = 5.0 Hz, 1H), 2.58 (s, 3H). <sup>13</sup>C NMR (100 MHz, CDCl<sub>3</sub>) δ 161.1, 149.6, 139.9, 132.4, 129.4, 126.4, 17.7. IR (KBr): 3057, 2924, 2854, 1728, 1433, 1380, 1251, 1090, 1011, 899, 759, 682 cm<sup>-1</sup>; MS (EI) *m/z*: 167, 151, 125, 109, 84.

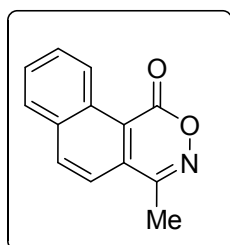

**4-Methyl-1H-naphtho[2,1-d][1,2]oxazin-1-one (2t).** Pale yellow solid, m.p. 162-163 °C. <sup>1</sup>H NMR (400 MHz, CDCl<sub>3</sub>) δ 9.75 (d, *J* = 8.6 Hz, 1H), 8.34 (d, *J* = 8.7 Hz, 1H), 7.99 (d, *J* = 8.0 Hz, 1H), 7.84 (t, *J* = 7.7 Hz, 1H), 7.77 (t, *J* = 7.3 Hz, 1H), 7.66 (d, *J* = 8.6 Hz, 1H), 2.67 (s, 3H). <sup>13</sup>C NMR (100 MHz, CDCl<sub>3</sub>) δ 163.8, 153.1, 137.4, 135.2, 130.3, 130.0, 129.3, 128.7, 128.2, 128.1, 120.5, 117.7, 17.5. IR (KBr): 3055, 2923, 2852, 1722, 1635, 1509,

1468, 1429, 1386, 1265, 1107, 1025, 988, 938, 826, 755  $\text{cm}^{-1}$ ; ESI-HRMS calcd for  $\text{C}_{13}\text{H}_{10}\text{NO}_2$   $[\text{M}+\text{H}]^+$  212.0706, found 212.0705.

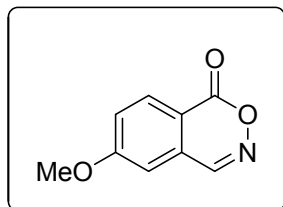

**6-Methoxy-1H-benzo[d][1,2]oxazin-1-one (2u).** Pale yellow solid, m.p. 153-154 °C.  $^1\text{H}$  NMR (400 MHz,  $\text{DMSO-d}_6$ )  $\delta$  11.15 (s, 1H), 7.73 (d,  $J = 7.9$  Hz, 1H), 7.29 (d,  $J = 10.0$  Hz, 2H), 3.91 (s, 3H).  $^{13}\text{C}$  NMR (100 MHz,  $\text{DMSO-d}_6$ )  $\delta$  168.8, 168.7, 164.3, 135.2, 124.7, 124.5, 119.8, 107.8, 56.2. IR (KBr): 3056, 2923, 2851, 1717, 1647, 1612, 1486, 1384, 1265, 1097, 1026, 828, 758, 693  $\text{cm}^{-1}$ . ESI-HRMS calcd for  $\text{C}_9\text{H}_7\text{NNaO}_3$   $[\text{M}+\text{Na}]^+$  200.0318, found 200.0320.

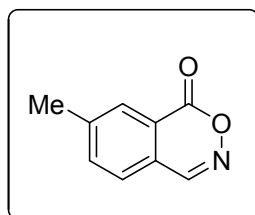

**7-Methyl-1H-benzo[d][1,2]oxazin-1-one (2v).** Yellow solid, m.p. 187-188 °C.  $^1\text{H}$  NMR (400 MHz,  $\text{CDCl}_3$ )  $\delta$  7.74 (d,  $J = 7.6$  Hz, 2H), 7.66 (s, 1H), 7.54 (d,  $J = 7.5$  Hz, 1H), 2.52 (s, 3H).  $^{13}\text{C}$  NMR (100 MHz,  $\text{CDCl}_3$ )  $\delta$  168.1, 168.0, 145.7, 134.9, 133.0, 130.0, 124.1, 123.5, 22.0. IR (KBr): 3065, 2925, 2855, 1718, 1612, 1541, 1380, 1333, 1280, 1105, 1028, 838, 741  $\text{cm}^{-1}$ . ESI-HRMS calcd for  $\text{C}_9\text{H}_7\text{NNaO}_2$   $[\text{M}+\text{Na}]^+$  184.0369, found 184.0362.

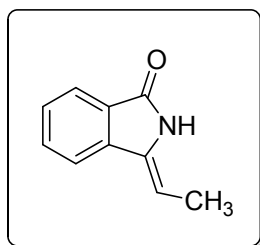

**(Z)-3-Ethylideneisoindolin-1-one (3a).** Yellow solid, m.p. 107-108 °C.  $^1\text{H}$  NMR (400 MHz,  $\text{CDCl}_3$ )  $\delta$  9.76 (s, 1H), 7.85 (d,  $J = 7.4$  Hz, 1H), 7.63 (d,  $J = 7.6$  Hz, 1H), 7.55 (t,  $J = 7.3$  Hz, 1H), 7.44 (t,  $J = 7.2$  Hz, 1H), 5.69 (q,  $J = 7.1$  Hz, 1H), 2.06 (d,  $J = 7.1$  Hz, 3H).  $^{13}\text{C}$  NMR (100 MHz,  $\text{CDCl}_3$ )  $\delta$  169.5, 137.6, 134.4, 131.8, 129.6, 128.3, 123.2, 119.3, 103.3, 12.6. IR (KBr): 3458, 3054, 2922, 2852, 1690, 1645, 1466, 1383, 1266, 1093, 802, 753  $\text{cm}^{-1}$ .

ESI-HRMS calcd for C<sub>10</sub>H<sub>10</sub>NO [M+H]<sup>+</sup> 160.0757, found 160.0756.

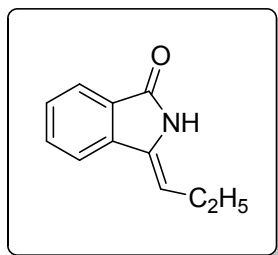

**(Z)-3-Propylideneisoindolin-1-one (3b).** Yellow solid, m.p. 93-94 °C. <sup>1</sup>H NMR (400 MHz, CDCl<sub>3</sub>) δ 9.19 (s, 1H), 7.85 (d, *J* = 7.6 Hz, 1H), 7.65 (d, *J* = 7.7 Hz, 1H), 7.56 (t, *J* = 7.5 Hz, 1H), 7.45 (t, *J* = 7.4 Hz, 1H), 5.63 (t, *J* = 7.7 Hz, 1H), 2.43 (m, 2H), 1.19 (t, *J* = 7.5 Hz, 3H). <sup>13</sup>C NMR (100 MHz, CDCl<sub>3</sub>) δ 169.2, 137.7, 132.9, 131.9, 129.5, 128.4, 123.3, 119.4, 110.3, 20.7, 14.1. IR (KBr): 3451, 3055, 2927, 2857, 1691, 1616, 1470, 1381, 1268, 1093, 753 cm<sup>-1</sup>. ESI-HRMS calcd for C<sub>11</sub>H<sub>12</sub>NO [M+H]<sup>+</sup> 174.0913, found 174.0906.

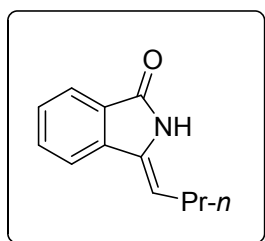

**(Z)-3-Butylideneisoindolin-1-one (3c).** Yellow oil. <sup>1</sup>H NMR (400 MHz, CDCl<sub>3</sub>) δ 8.96 (s, 1H), 7.85 (d, *J* = 7.6 Hz, 1H), 7.65 (d, *J* = 7.7 Hz, 1H), 7.56 (t, *J* = 7.5 Hz, 1H), 7.45 (t, *J* = 7.4 Hz, 1H), 5.64 (t, *J* = 7.8 Hz, 1H), 2.37 (q, *J* = 7.4 Hz, 2H), 1.58 (m, 2H), 1.02 (t, *J* = 7.3 Hz, 3H). <sup>13</sup>C NMR (100 MHz, CDCl<sub>3</sub>) δ 169.0, 137.7, 133.6, 131.9, 129.6, 128.4, 123.3, 119.5, 108.3, 29.2, 22.8, 13.8. IR (KBr): 3470, 3045, 2926, 2854, 1690, 1640, 1467, 1386, 1266, 1099, 745 cm<sup>-1</sup>. ESI-HRMS calcd for C<sub>12</sub>H<sub>13</sub>NNaO [M+Na]<sup>+</sup> 210.0889, found 210.0887.

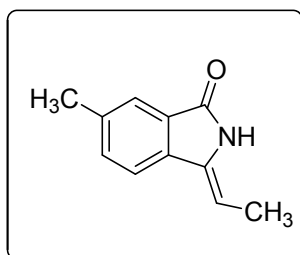

**(Z)-3-Ethylidene-6-methylisoindolin-1-one (3d).** Pale yellow solid, m.p. 223-224 °C. <sup>1</sup>H NMR (400 MHz, CDCl<sub>3</sub>) δ 9.63 (s, 1H), 7.65 (s, 1H), 7.51 (d, *J* = 7.9 Hz, 1H), 7.36 (d, *J* = 7.9 Hz, 1H), 5.62 (q, *J* = 7.3 Hz, 1H), 2.45 (s, 3H), 2.03 (d, *J* = 7.3 Hz, 3H). <sup>13</sup>C NMR (100 MHz, CDCl<sub>3</sub>) δ 169.5, 138.5, 135.2, 134.4, 133.0, 129.8, 123.3,

119.1, 102.4, 21.5, 12.6. IR (KBr): 3466, 3068, 2922, 2853, 1696, 1635, 1456, 1385, 1270, 1022, 824, 753  $\text{cm}^{-1}$ .

ESI-HRMS calcd for  $\text{C}_{11}\text{H}_{11}\text{NNaO}$   $[\text{M}+\text{Na}]^+$  196.0733, found 196.0735.

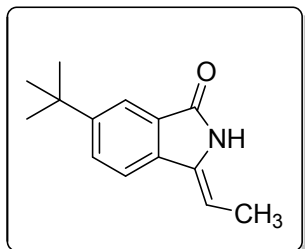

**(Z)-6-(tert-Butyl)-3-ethylideneisoindolin-1-one (3e).** Pale yellow solid, m.p. 188-189  $^{\circ}\text{C}$ .  $^1\text{H}$  NMR (400 MHz,  $\text{CDCl}_3$ )  $\delta$  8.99 (s, 1H), 7.86 (s, 1H), 7.62 (d,  $J = 8.1$  Hz, 1H), 7.55 (d,  $J = 8.1$  Hz, 1H), 5.63 (q,  $J = 7.3$  Hz, 1H), 2.01 (d,  $J = 7.3$  Hz, 3H), 1.37 (s, 9H).  $^{13}\text{C}$  NMR (100 MHz,  $\text{CDCl}_3$ )  $\delta$  169.5, 152.2, 135.2, 134.2, 129.6, 129.4, 119.8, 119.1, 102.1, 35.1, 31.4, 12.6. IR (KBr): 3466, 3038, 2926, 2857, 1690, 1635, 1457, 1385, 1270, 1022, 825, 756  $\text{cm}^{-1}$ . ESI-HRMS calcd for  $\text{C}_{14}\text{H}_{17}\text{NNaO}$   $[\text{M}+\text{Na}]^+$  238.1202, found 238.1200.

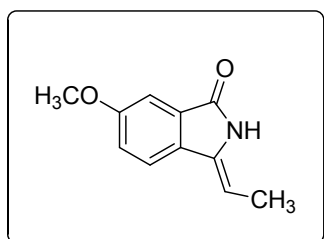

**(Z)-3-Ethylidene-6-methoxyisoindolin-1-one (3f).** White solid, m.p. 196-197  $^{\circ}\text{C}$ .  $^1\text{H}$  NMR (400 MHz,  $\text{CDCl}_3$ )  $\delta$  8.99 (s, 1H), 7.52 (d,  $J = 8.4$  Hz, 1H), 7.30 (s, 1H), 7.12 (d,  $J = 8.4$  Hz, 1H), 5.55 (q,  $J = 7.3$  Hz, 1H), 3.88 (s, 3H), 1.99 (d,  $J = 7.3$  Hz, 3H).  $^{13}\text{C}$  NMR (100 MHz,  $\text{CDCl}_3$ )  $\delta$  168.9, 160.4, 134.0, 130.9, 130.6, 120.8, 120.6, 105.5, 101.5, 55.7, 12.5. IR (KBr): 3450, 3058, 2922, 2845, 1685, 1545, 1512, 1411, 1242, 1178, 1031, 827, 753  $\text{cm}^{-1}$ . ESI-HRMS calcd for  $\text{C}_{11}\text{H}_{11}\text{NNaO}_2$   $[\text{M}+\text{Na}]^+$  212.0682, found 212.0684.

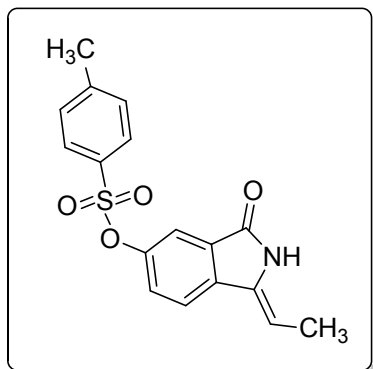

**(Z)-1-Ethylidene-3-oxoisindolin-5-yl 4-methylbenzenesulfonate (3g).** Yellow solid, m.p. 193-194 °C. <sup>1</sup>H NMR (400 MHz, CDCl<sub>3</sub>) δ 9.32 (s, 1H), 7.71 (d, *J* = 8.1 Hz, 2H), 7.56 (d, *J* = 8.4 Hz, 1H), 7.39 (s, 1H), 7.31 (d, *J* = 8.0 Hz, 3H), 5.67 (q, *J* = 7.3 Hz, 1H), 2.44 (s, 3H), 2.00 (d, *J* = 7.3 Hz, 3H). <sup>13</sup>C NMR (100 MHz, CDCl<sub>3</sub>) δ 167.7, 149.7, 145.7, 136.0, 133.4, 132.0, 130.7, 129.9, 128.5, 126.6, 120.8, 117.1, 104.5, 21.7, 12.7. IR (KBr): 3455, 3064, 2923, 2853, 1690, 1647, 1550, 1473, 1374, 1267, 1093, 810, 749 cm<sup>-1</sup>. ESI-HRMS calcd for C<sub>17</sub>H<sub>15</sub>NNaO<sub>4</sub>S [M+Na]<sup>+</sup> 352.0619, found 352.0622.

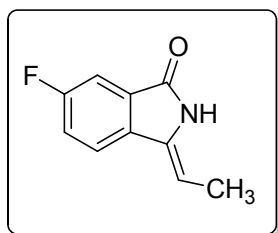

**(Z)-3-Ethylidene-6-fluoroisindolin-1-one (3h).** Pale yellow solid, m.p. 205-206 °C. <sup>1</sup>H NMR (400 MHz, DMSO-*d*<sub>6</sub>) δ 10.69 (s, 1H), 7.90 (dd, *J* = 8.1, 4.6 Hz, 1H), 7.46 (t, *J* = 9.1 Hz, 2H), 5.76 (q, *J* = 7.4 Hz, 1H), 1.91 (d, *J* = 7.4 Hz, 3H). <sup>13</sup>C NMR (100 MHz, DMSO-*d*<sub>6</sub>) δ 167.1, 164.0, 161.6, 134.0, 131.7, 122.7, 120.0, 109.2, 103.6, 12.9. IR (KBr): 3466, 3054, 2921, 2851, 1690, 1640, 1483, 1387, 1267, 1093, 746 cm<sup>-1</sup>. ESI-HRMS calcd for C<sub>10</sub>H<sub>8</sub>FNNaO [M+Na]<sup>+</sup> 200.0482, found 200.0480.

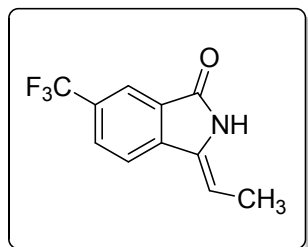

**(Z)-3-Ethylidene-6-(trifluoromethyl)isindolin-1-one (3i).** Pale yellow solid, m.p. 238-239 °C. <sup>1</sup>H NMR (400 MHz, DMSO-*d*<sub>6</sub>) δ 10.86 (s, 1H), 8.08 (d, *J* = 8.2 Hz, 1H), 7.96 (d, *J* = 7.6 Hz, 2H), 5.98 (q, *J* = 7.4 Hz, 1H), 1.96



(d,  $J = 7.4$  Hz, 3H).  $^{13}\text{C}$  NMR (100 MHz, DMSO- $d_6$ )  $\delta$  166.8, 141.0, 133.9, 130.2, 129.5, 129.0, 125.8, 121.7, 119.9, 106.7, 13.1. IR (KBr): 3442, 3054, 2922, 2851, 1701, 1646, 1385, 1322, 1271, 1118, 1025, 998, 827, 762  $\text{cm}^{-1}$ . ESI-HRMS calcd for  $\text{C}_{11}\text{H}_8\text{F}_3\text{NNaO}$   $[\text{M}+\text{Na}]^+$  250.0450, found 250.0450.

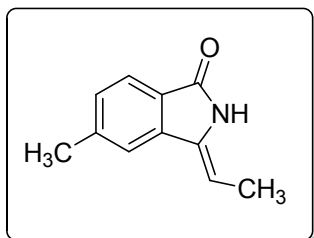

**(Z)-3-Ethylidene-5-methylisoindolin-1-one (3j).** Pale yellow solid, m.p.176-177 °C.  $^1\text{H}$  NMR (400 MHz,  $\text{CDCl}_3$ )  $\delta$  9.53 (s, 1H), 7.72 (d,  $J = 7.8$  Hz, 1H), 7.42 (s, 1H), 7.25 (d,  $J = 7.1$  Hz, 1H), 5.64 (q,  $J = 7.4$  Hz, 1H), 2.46 (s, 3H), 2.03 (d,  $J = 7.4$  Hz, 3H).  $^{13}\text{C}$  NMR (100 MHz,  $\text{CDCl}_3$ )  $\delta$  169.5, 142.5, 138.0, 134.5, 129.5, 127.2, 123.0, 119.7, 102.7, 22.0, 12.6. IR (KBr): 3455, 3058, 2925, 2855, 1687, 1618, 1475, 1360, 1269, 1172, 1045, 893, 749  $\text{cm}^{-1}$ . ESI-HRMS calcd for  $\text{C}_{11}\text{H}_{11}\text{NNaO}$   $[\text{M}+\text{Na}]^+$  196.0733, found 196.0735.

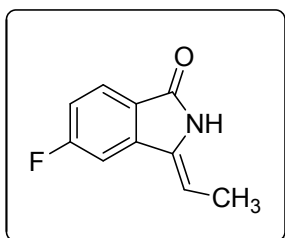

**(Z)-3-Ethylidene-5-fluoroisoindolin-1-one (3k).** Pale yellow solid, m.p.166-177 °C.  $^1\text{H}$  NMR (400 MHz, DMSO- $d_6$ ) 10.58 (s, 1H), 7.72 (dd,  $J = 11.7, 5.4$  Hz, 2H), 7.29 (t,  $J = 8.9$  Hz, 1H), 5.82 (q,  $J = 7.3$  Hz, 1H), 1.92 (d,  $J = 7.4$  Hz, 3H).  $^{13}\text{C}$  NMR (100 MHz, DMSO- $d_6$ )  $\delta$  167.3, 164.1, 140.4, 134.1, 126.2, 125.4, 116.7, 107.4, 104.6, 12.9. IR (KBr): 3456, 3053, 2925, 2853, 1690, 1617, 1475, 1383, 1268, 1187, 1093, 864, 748  $\text{cm}^{-1}$ . ESI-HRMS calcd for  $\text{C}_{10}\text{H}_8\text{FNNaO}$   $[\text{M}+\text{Na}]^+$  200.0482, found 200.0480.

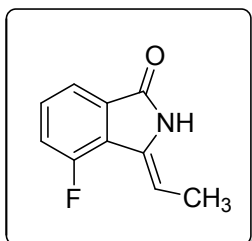

**(Z)-3-Ethylidene-4-fluoroisoindolin-1-one (3I).** Pale yellow solid, m.p.191-192 °C. <sup>1</sup>H NMR (400 MHz, CDCl<sub>3</sub>) δ 9.76 (s, 1H), 7.66 (d, *J* = 7.4 Hz, 1H), 7.42-7.37 (m, 1H), 7.23 (d, *J* = 9.0 Hz, 1H), 5.96 (q, *J* = 7.4 Hz, 1H), 2.06 (d, *J* = 7.4 Hz, 3H). <sup>13</sup>C NMR (100 MHz, CDCl<sub>3</sub>) δ 168.4, 158.9, 156.3, 132.6, 131.5, 129.5, 124.0, 119.4, 109.6, 13.2. IR (KBr): 3452, 3052, 2925, 2854, 1695, 1653, 1484, 1380, 1258, 1096, 1059, 755 cm<sup>-1</sup>. ESI-HRMS calcd for C<sub>10</sub>H<sub>8</sub>FNNaO [M+Na]<sup>+</sup> 200.0482, found 200.0480.

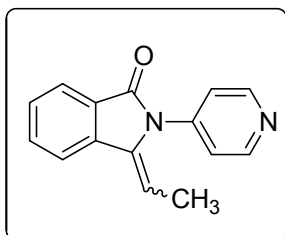

**3-Ethylidene-2-(pyridin-4-yl)isoindolin-1-one(4).** Pale yellow solid, m.p. 127-135 °C. *Z:E* = 3:2. <sup>1</sup>H NMR (400 MHz, CDCl<sub>3</sub>) δ 8.72 (dd, *J* = 11.0, 4.6 Hz, 3.4H), 8.00-7.79 (m, 3H), 7.70-7.61 (m, 2H), 7.55 (t, *J* = 7.4 Hz, 1H), 7.48 (t, *J* = 7.5 Hz, 1H), 7.34 (s, 3H), 5.83 (q, *J* = 7.7 Hz, 0.6H), **5.59 (q, *J* = 7.6 Hz, 1H)**, **2.19 (d, *J* = 7.6 Hz, 3H)**, 1.50 (d, *J* = 7.7 Hz, 1.8H). <sup>13</sup>C NMR (100 MHz, CDCl<sub>3</sub>) δ 167.1, 165.3, 151.0, 150.5, 144.5, 142.7, 138.2, 136.0, 135.5, 134.6, 132.7, 132.6, 129.3, 129.0, 128.7, 127.1, 124.0, 123.8, 123.6, 122.9, 122.4, 119.0, 108.1, 105.2, 13.9, 12.9. IR (KBr): 3466, 3054, 2921, 2851, 1690, 1644, 1453, 1283, 1187, 1093, 746 cm<sup>-1</sup>. MS (EI) *m/z*: 236, 207, 152, 115, 78.

## References

[1] T. G. Chun, K. S. Kim, S. Lee, T. Jeong, H. Lee, Y. H.Kim, W. S. Lee, *Syn. Commun.* **2004**, *34*, 1301.

## **NMR Spectra for All Compounds**

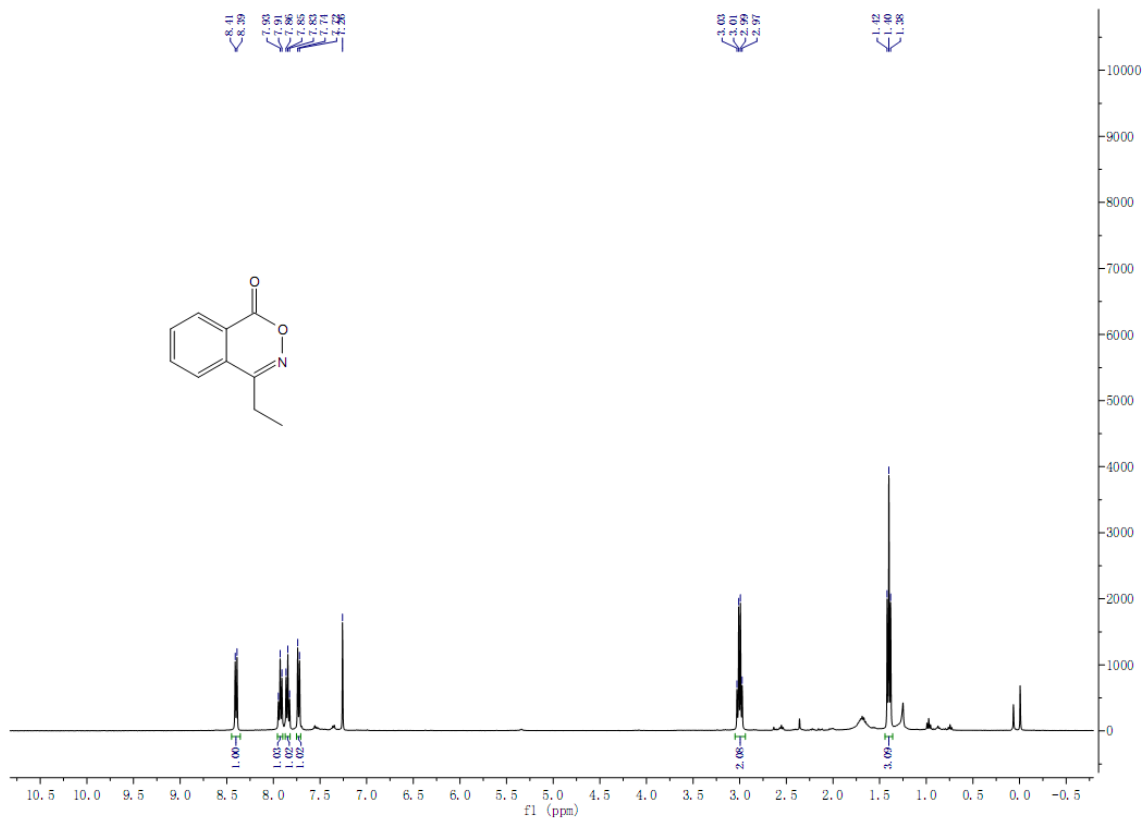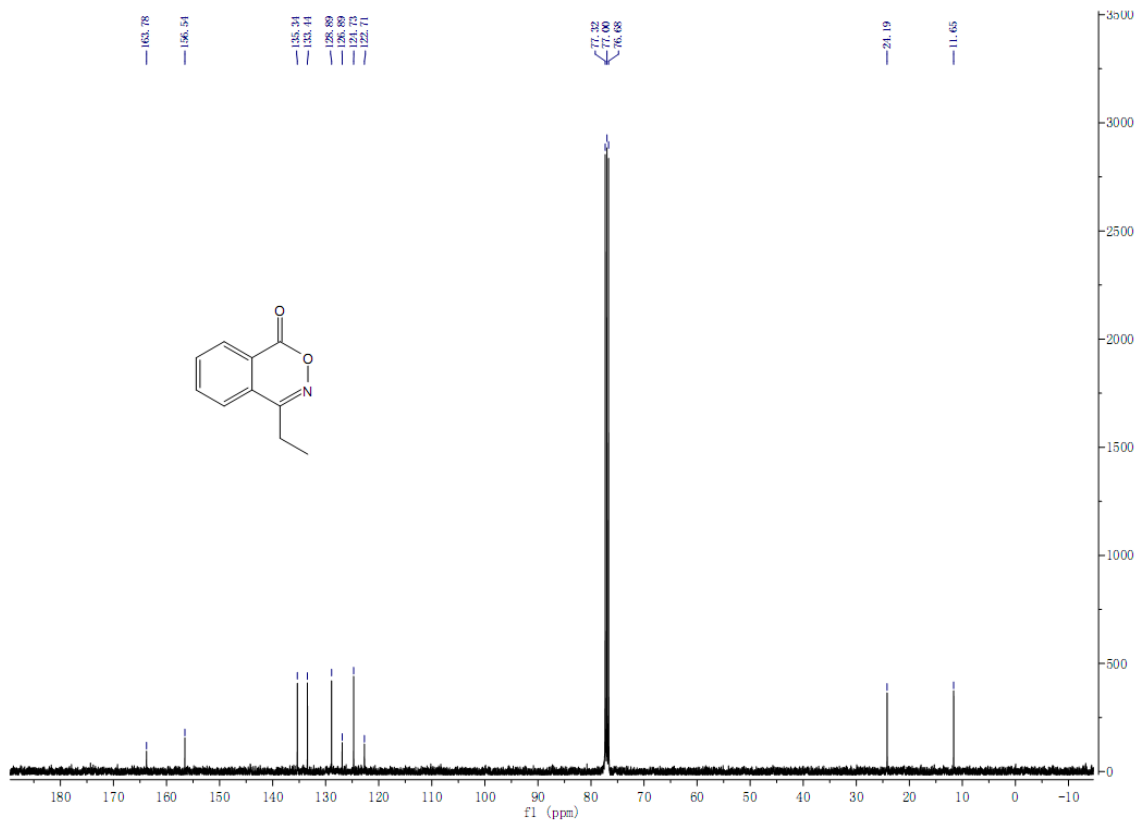

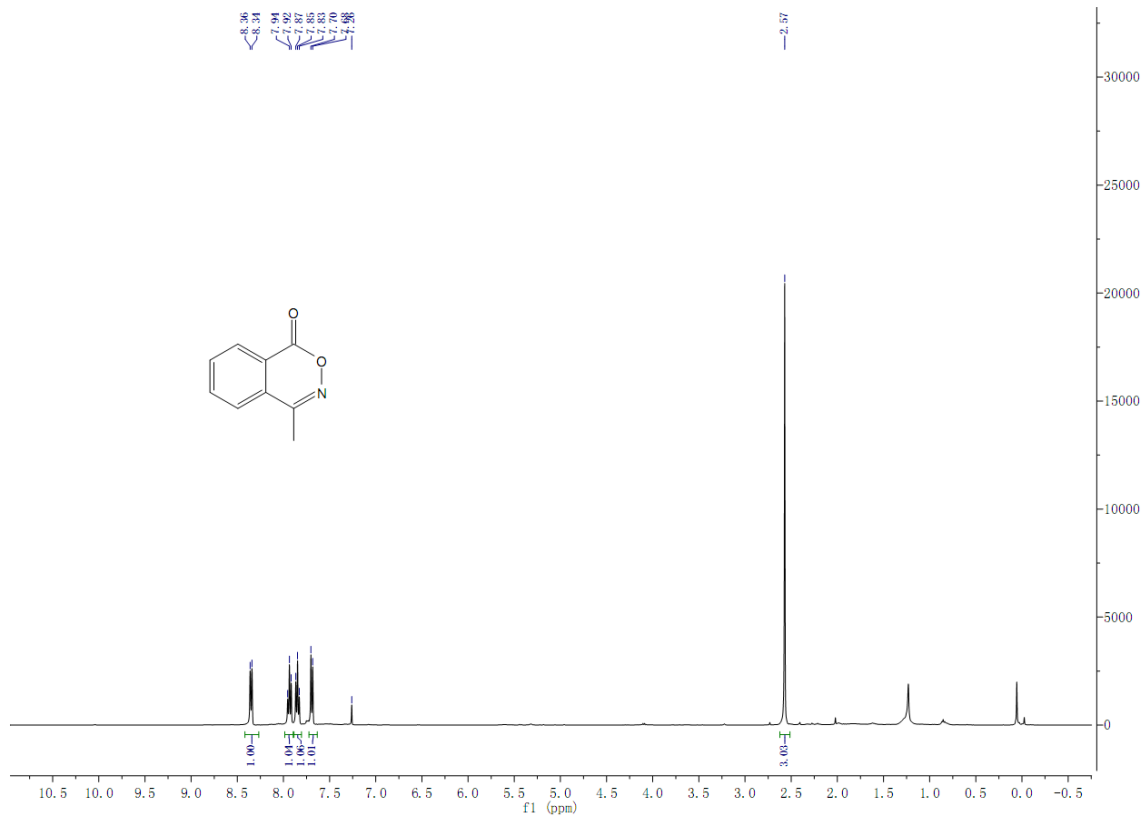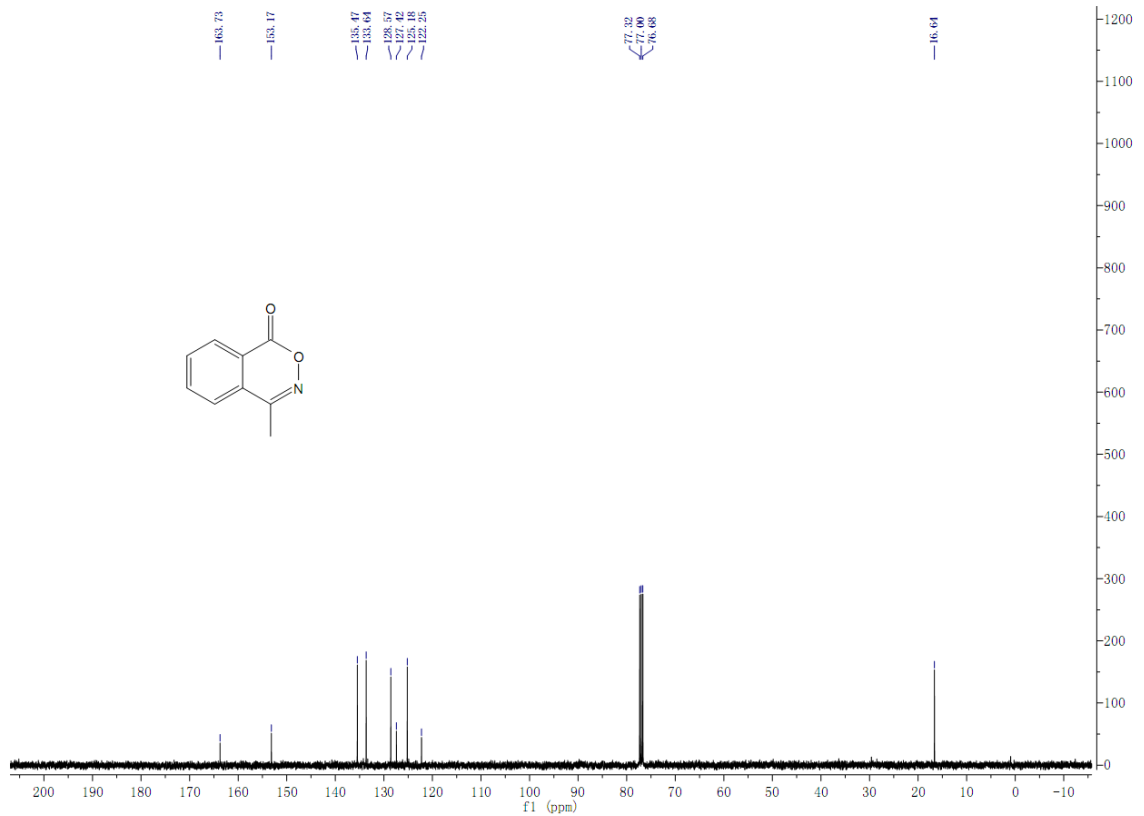

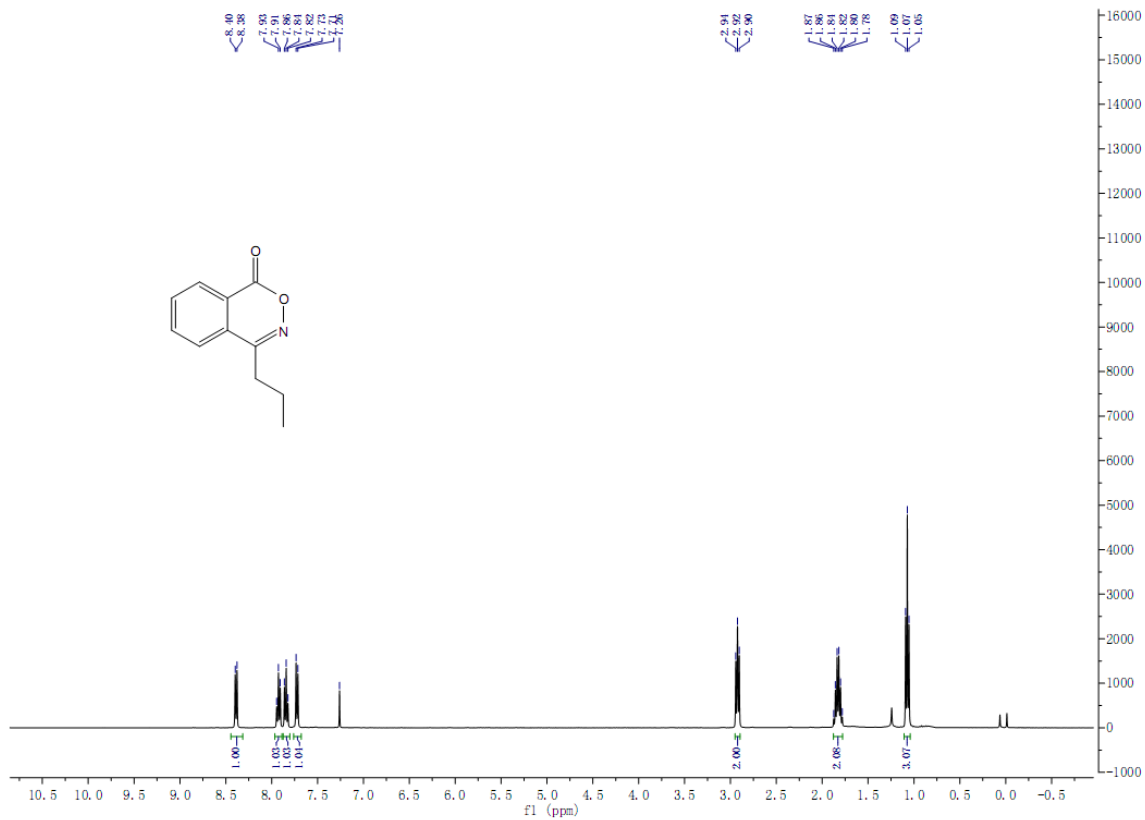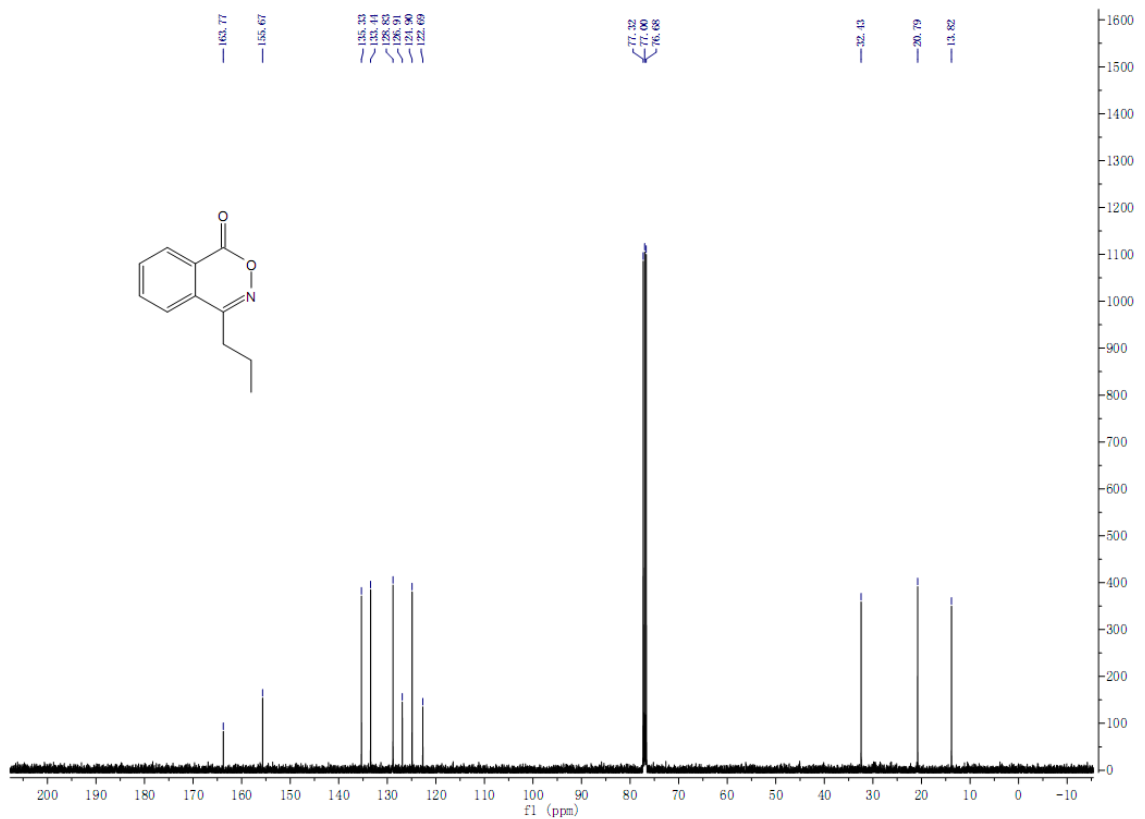

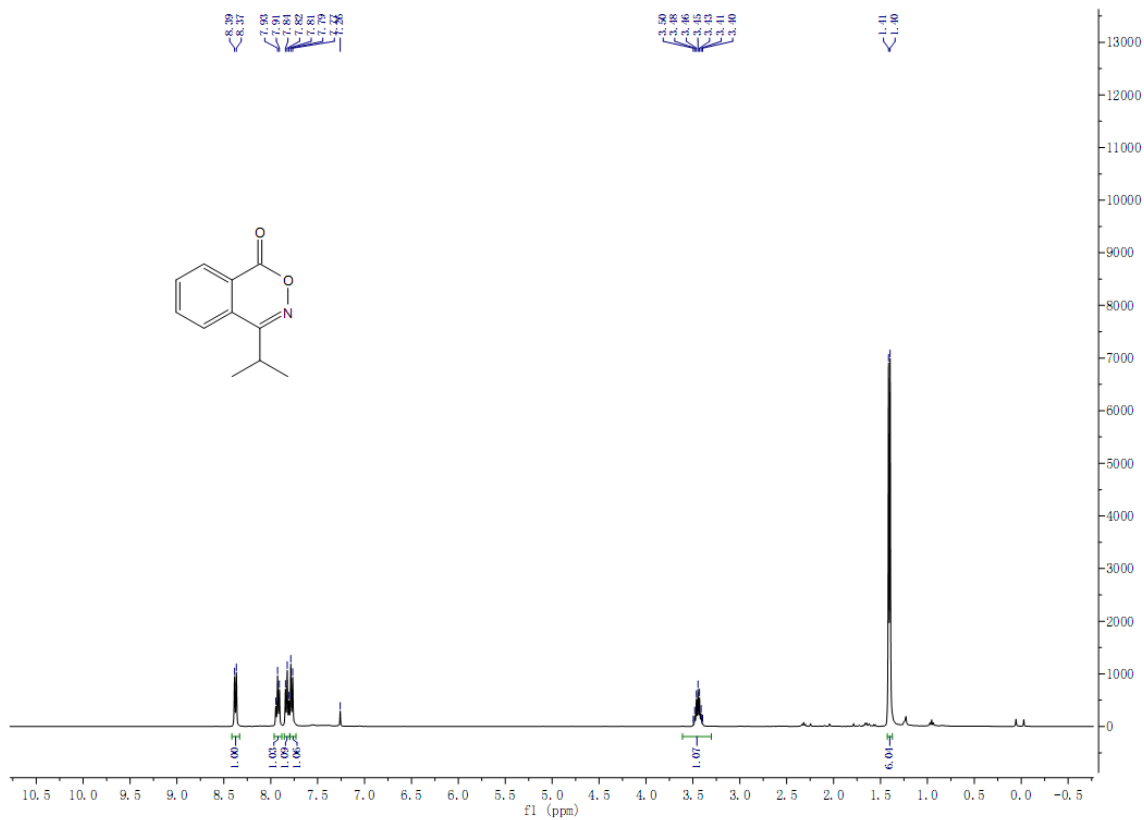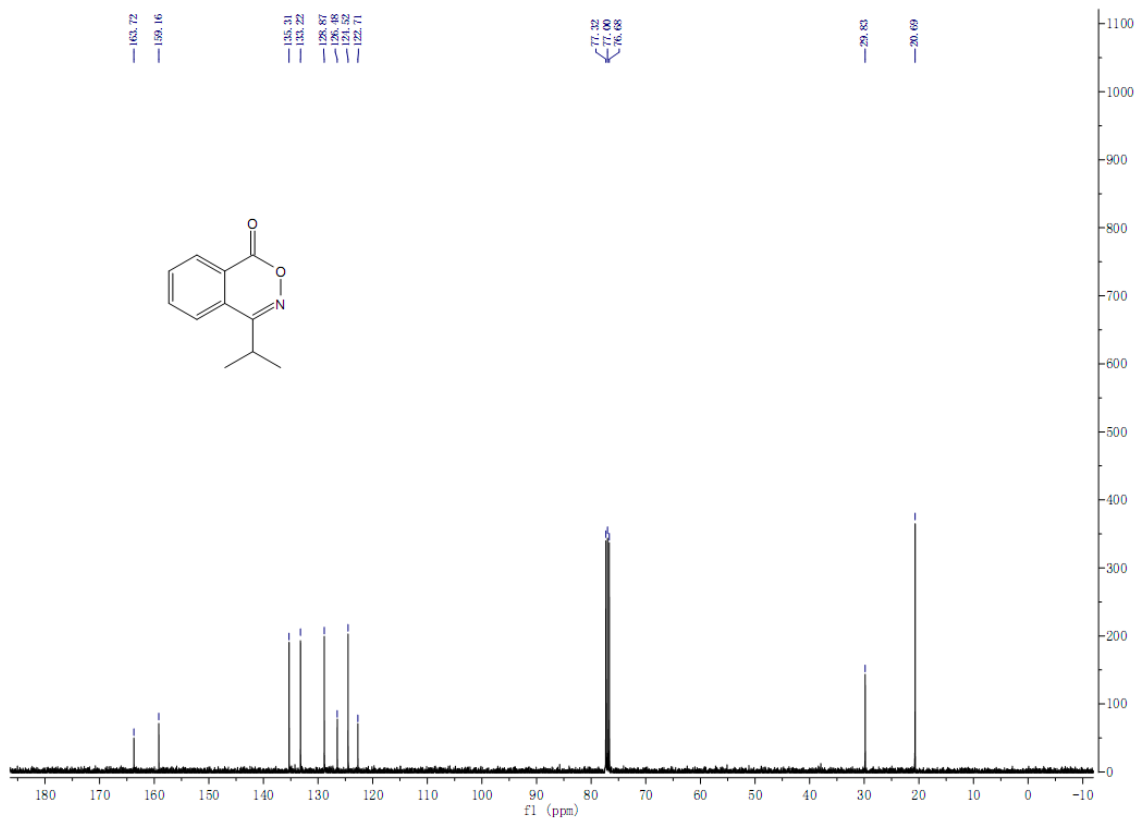

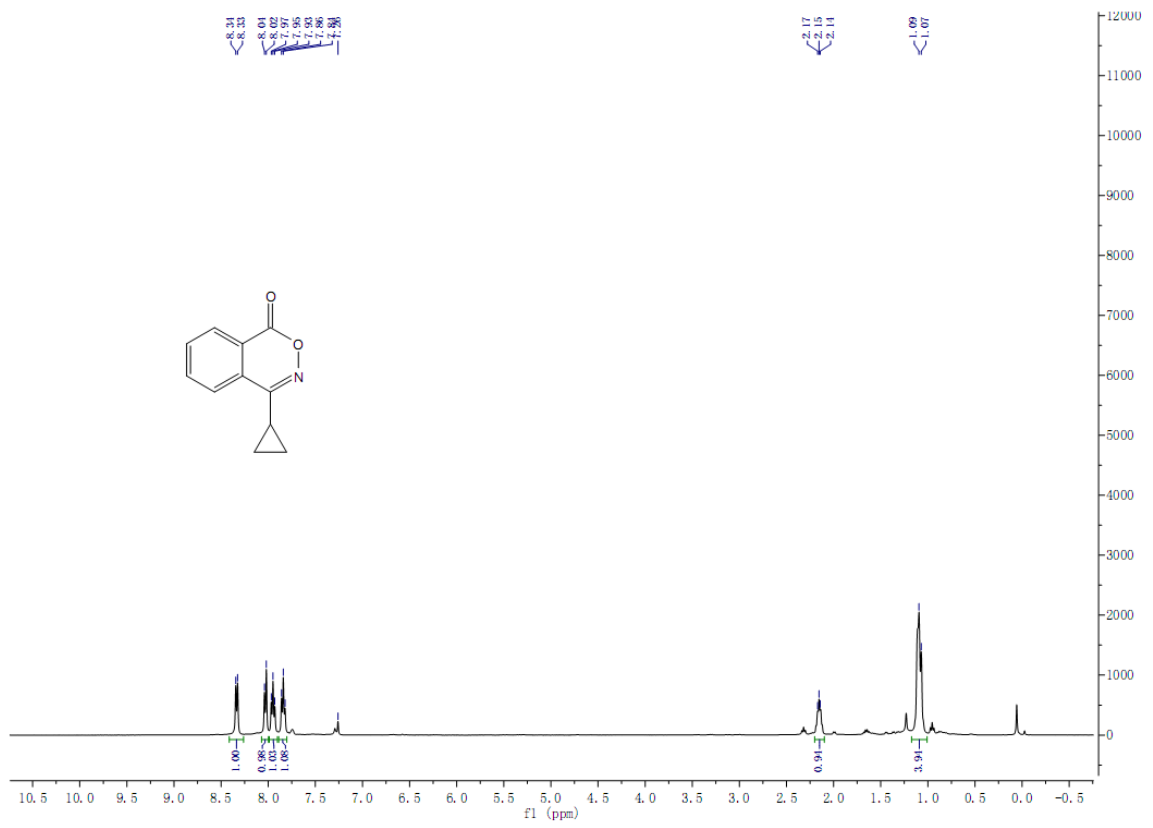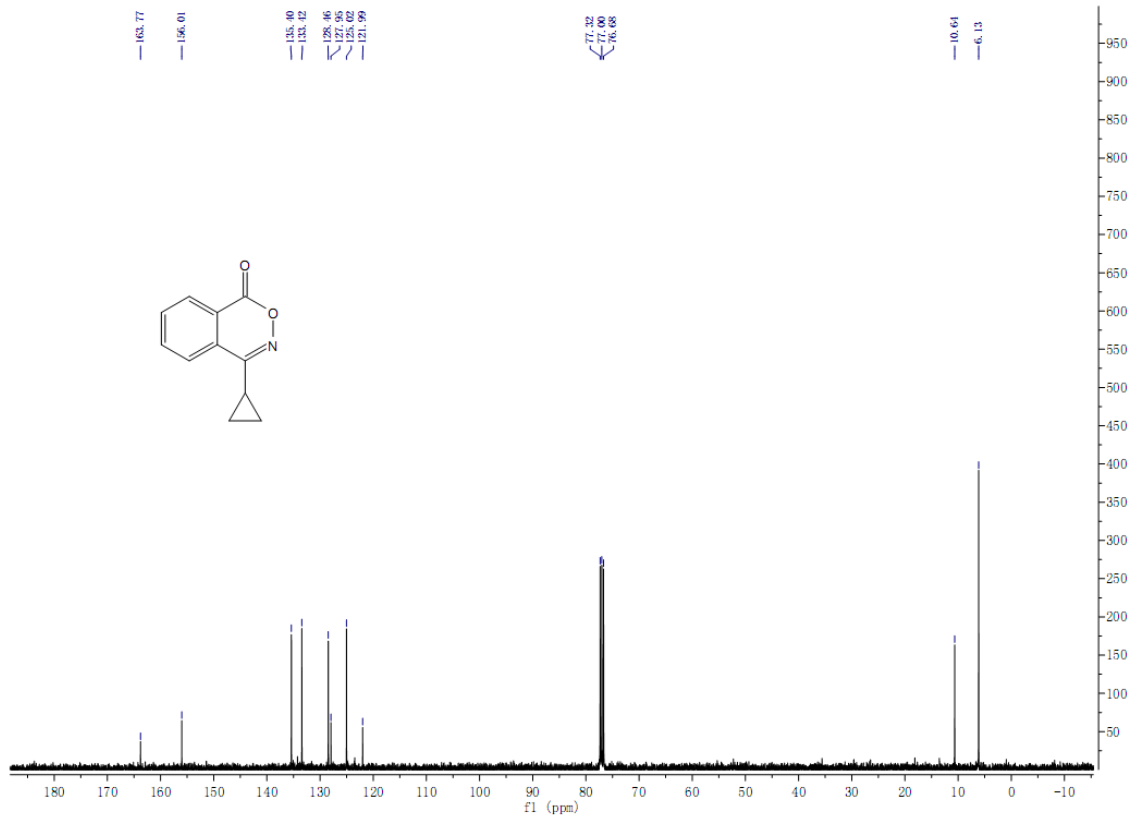



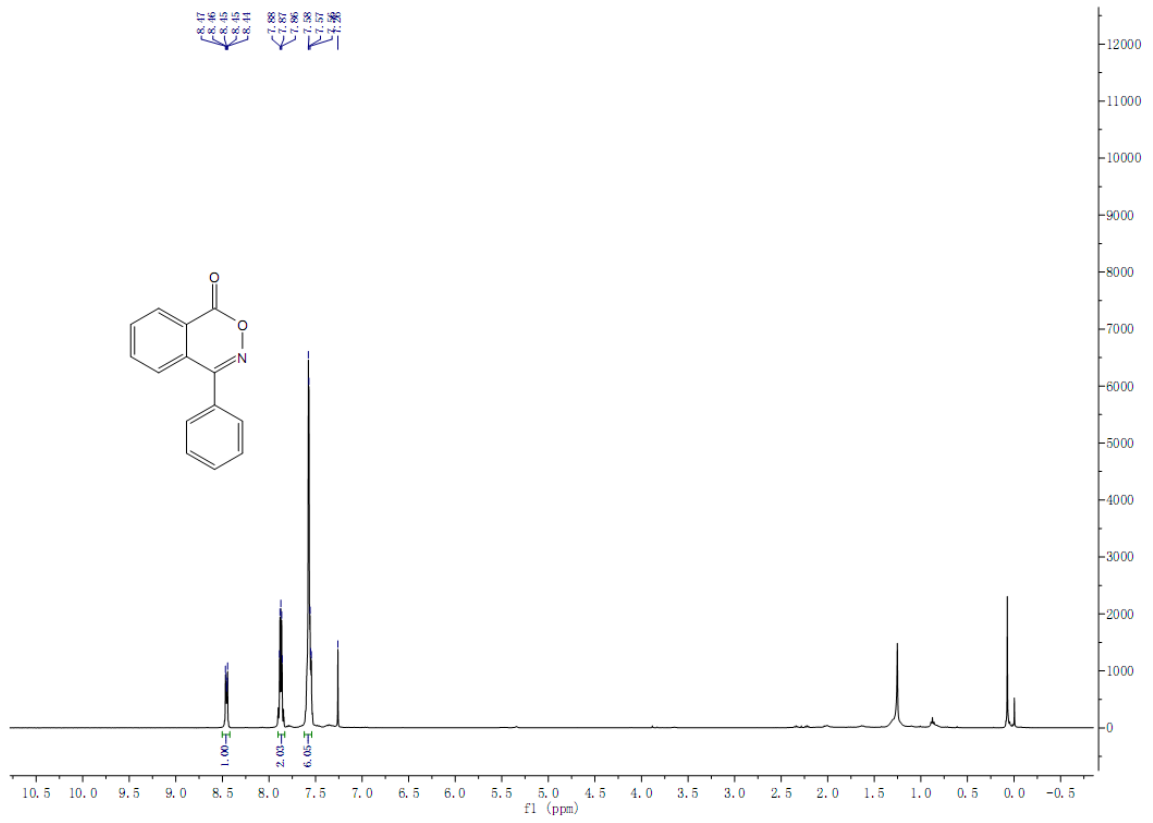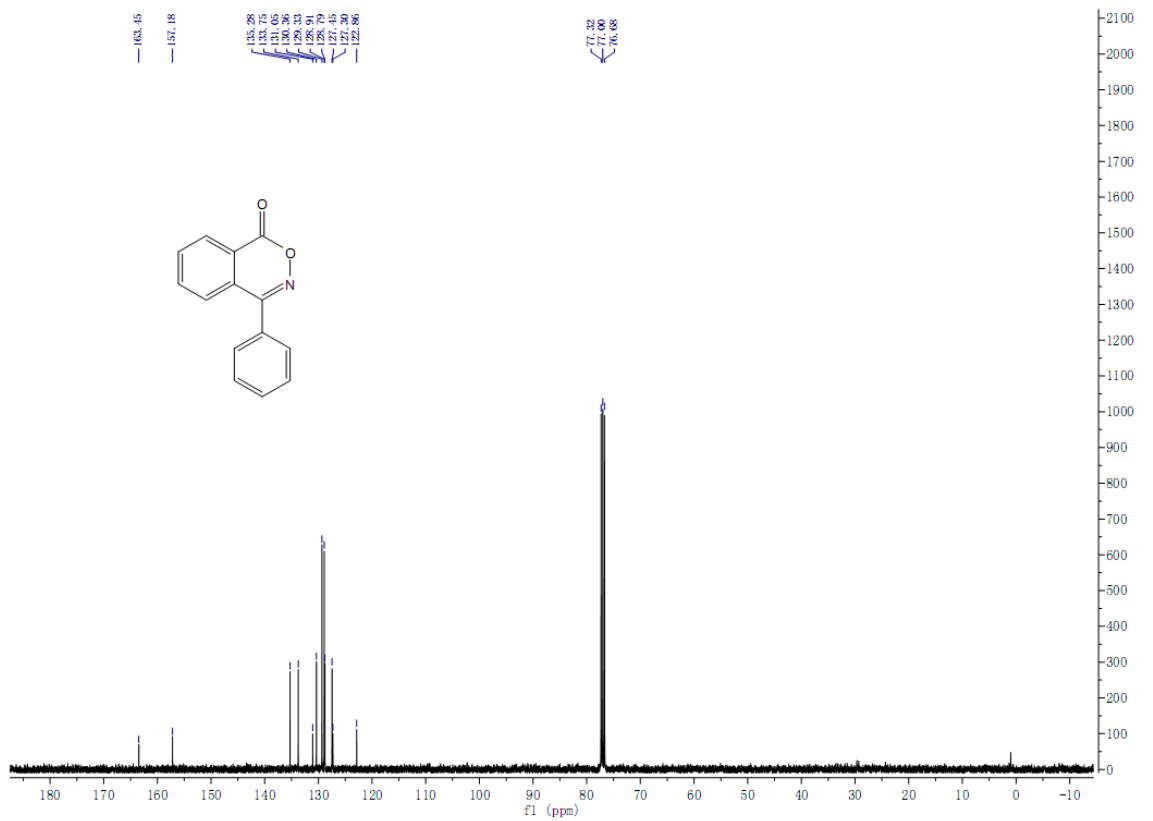

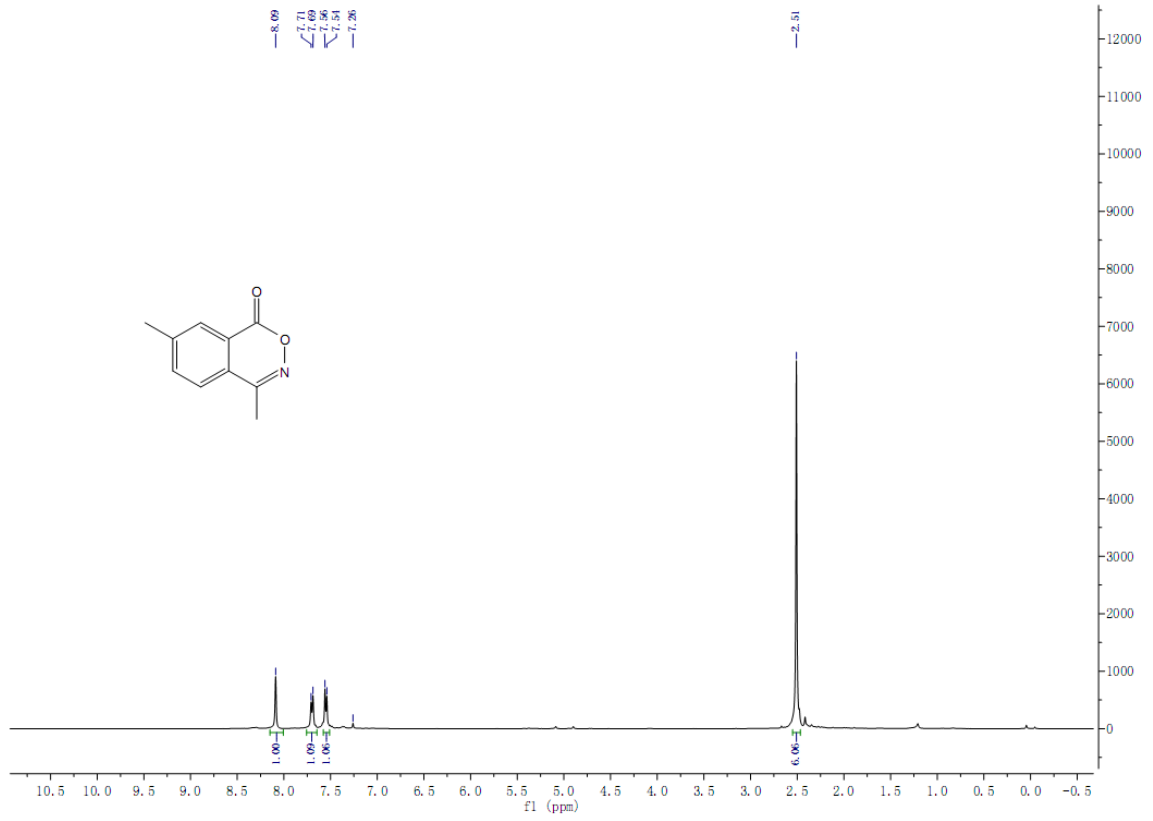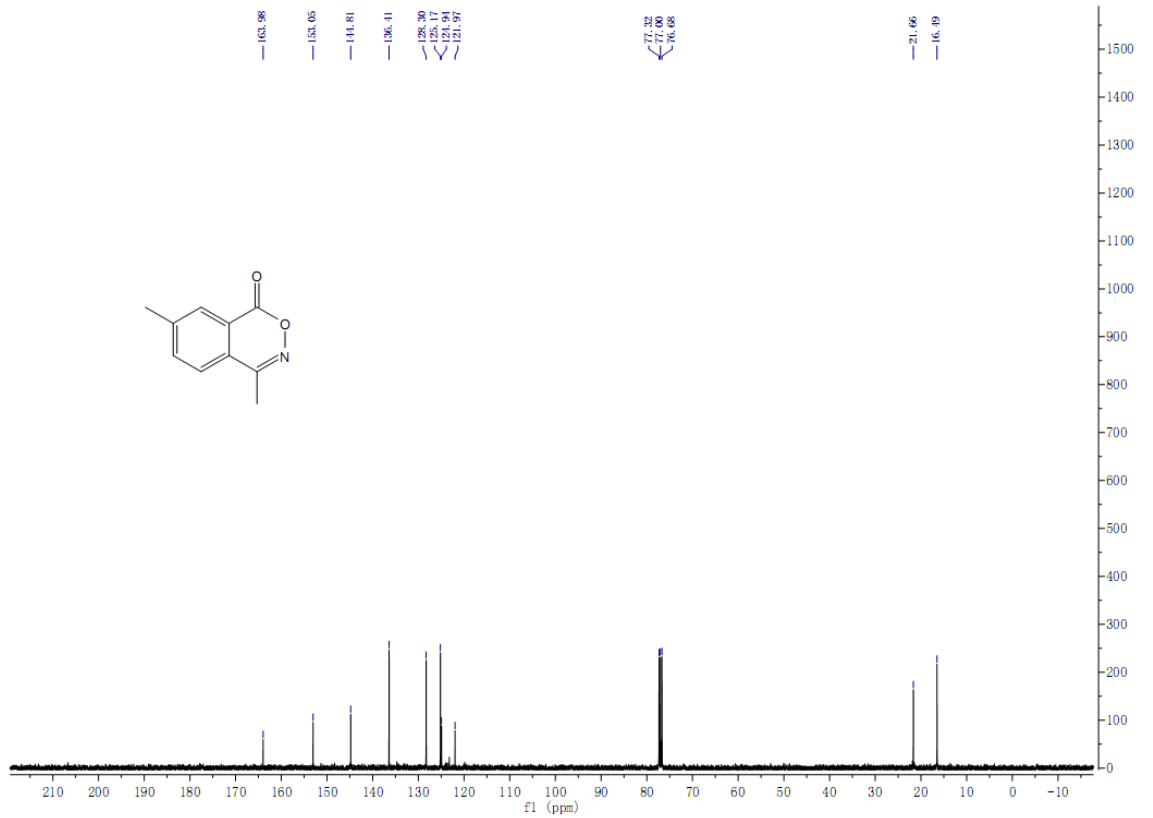

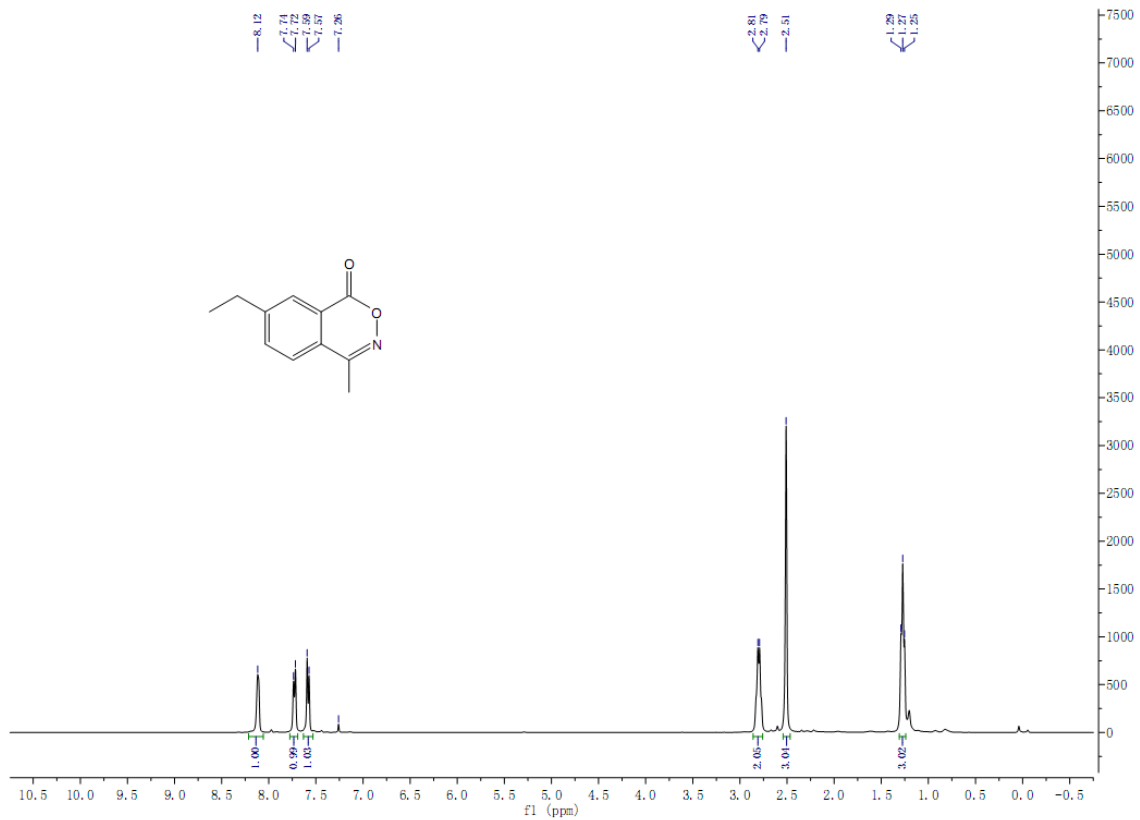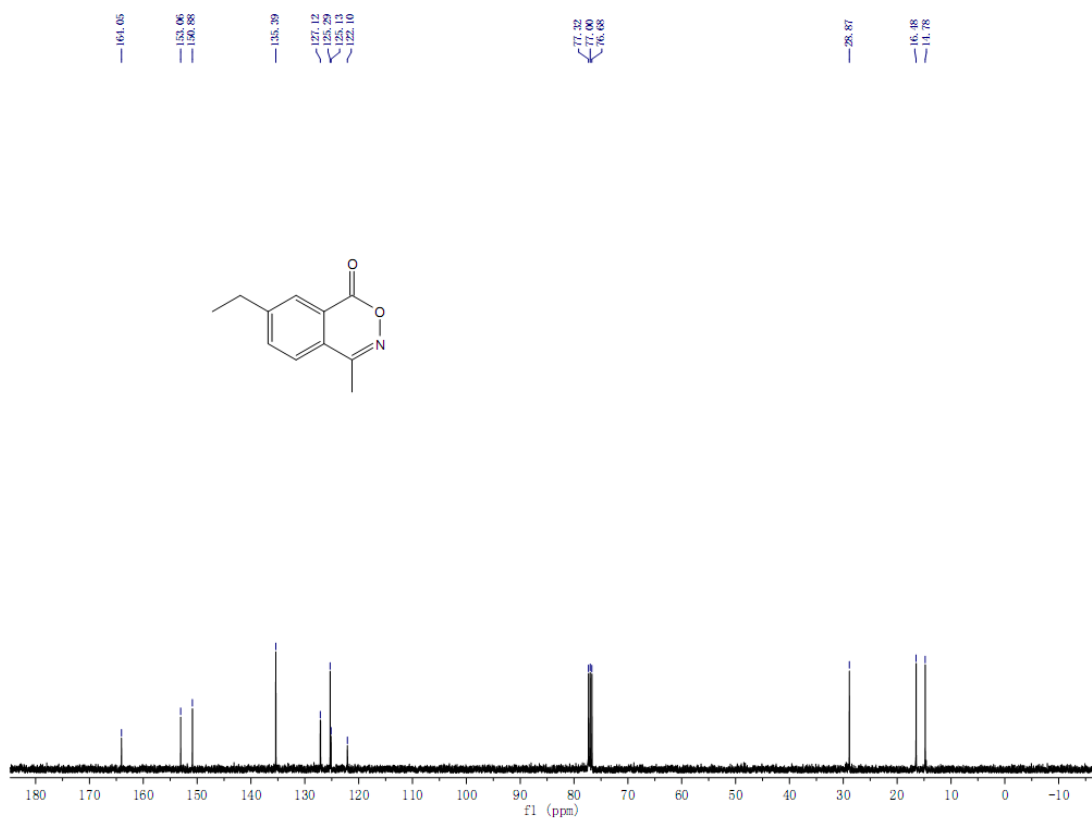

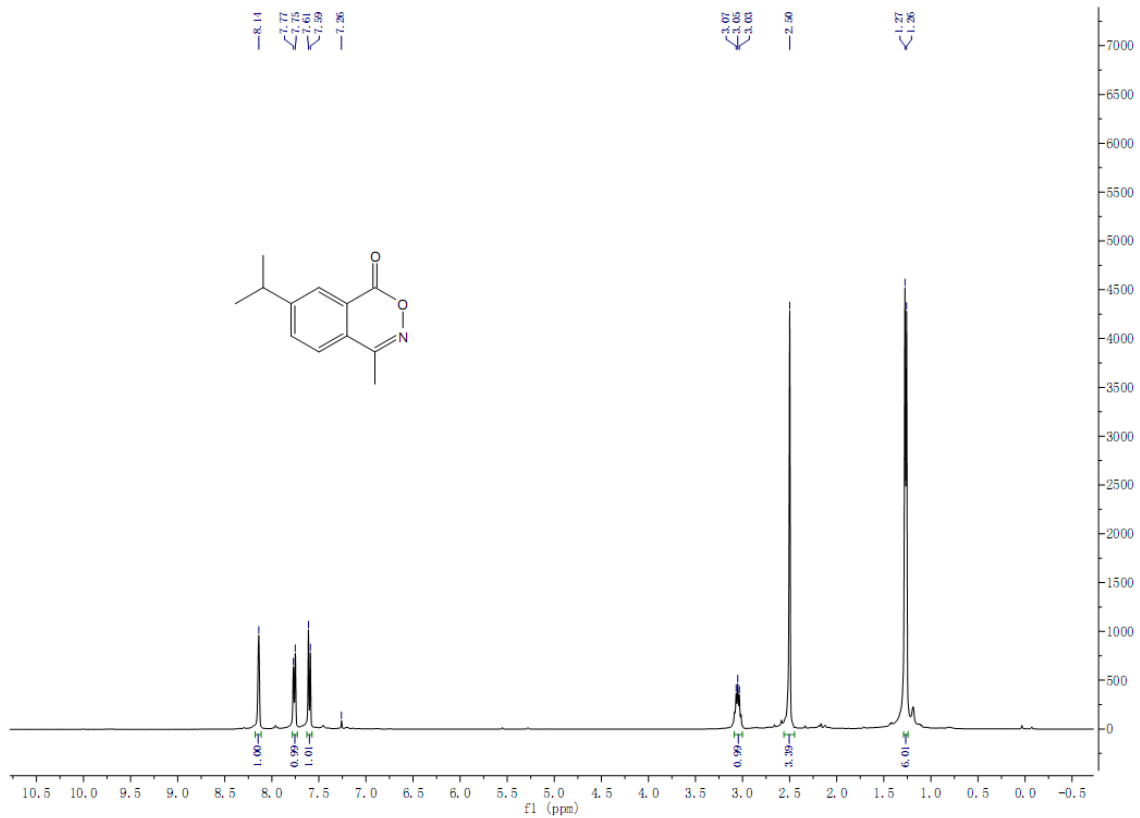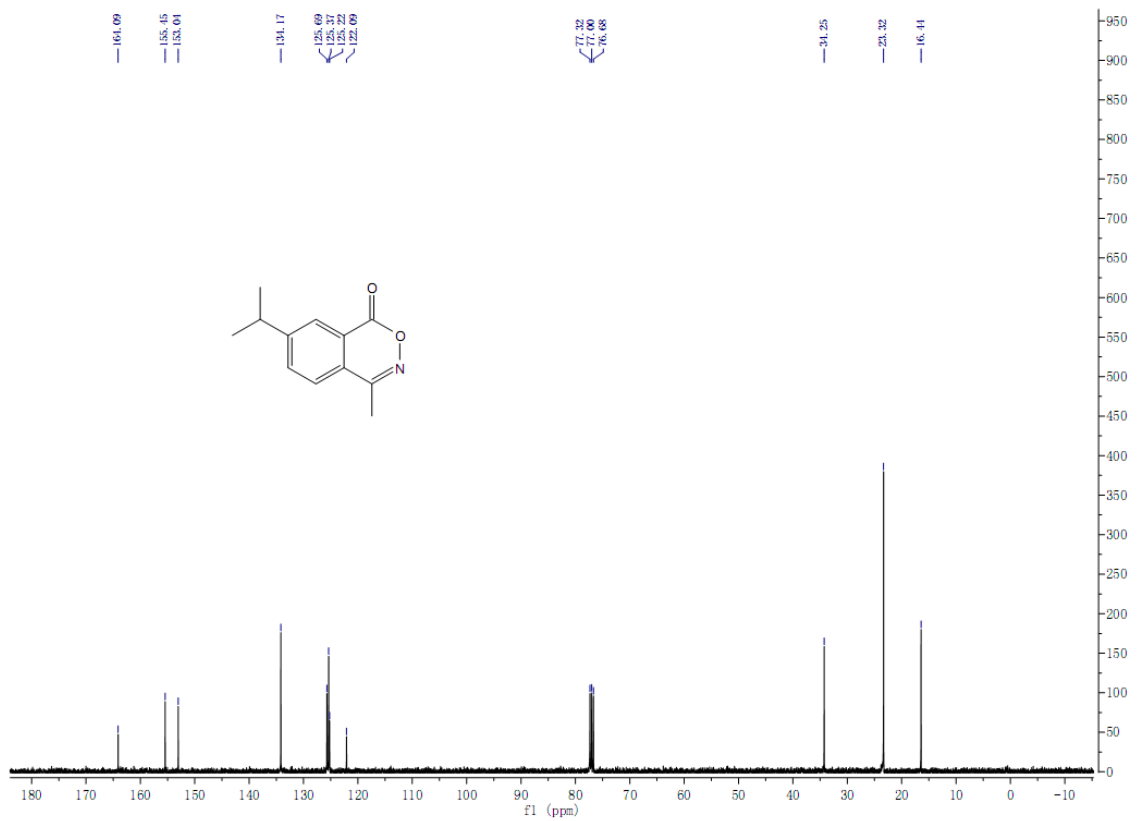

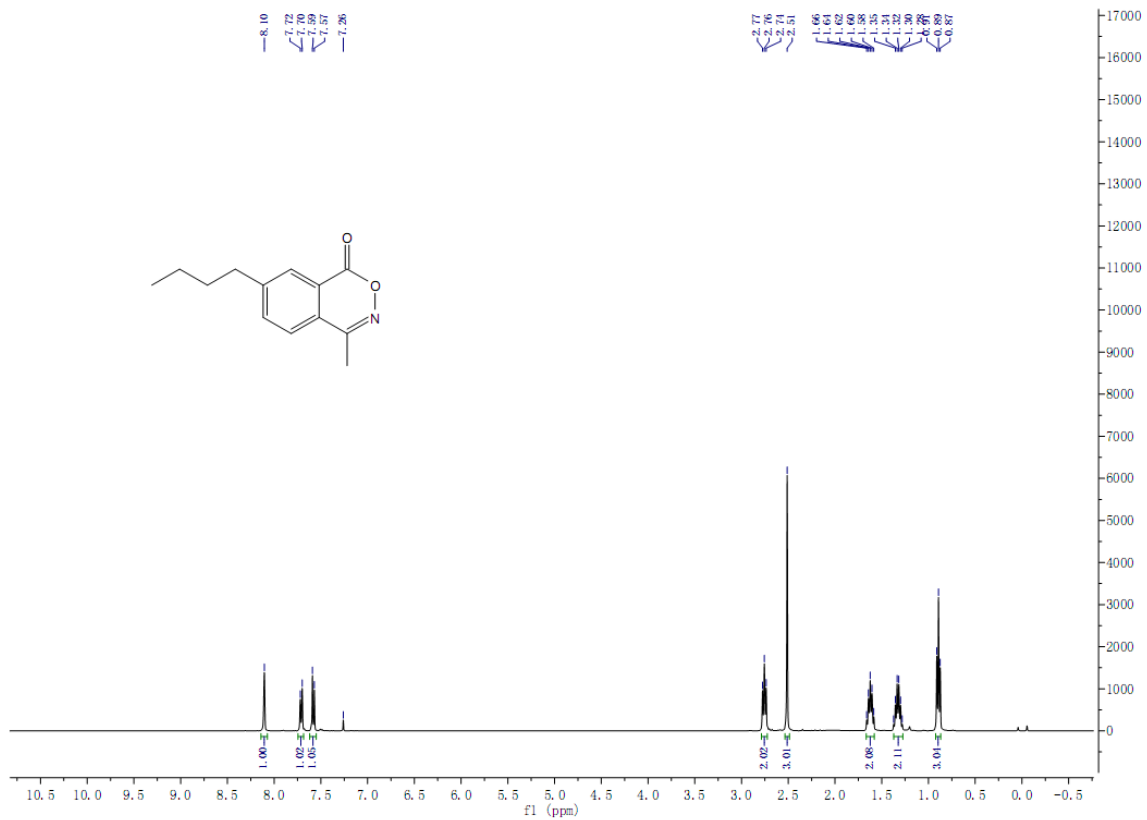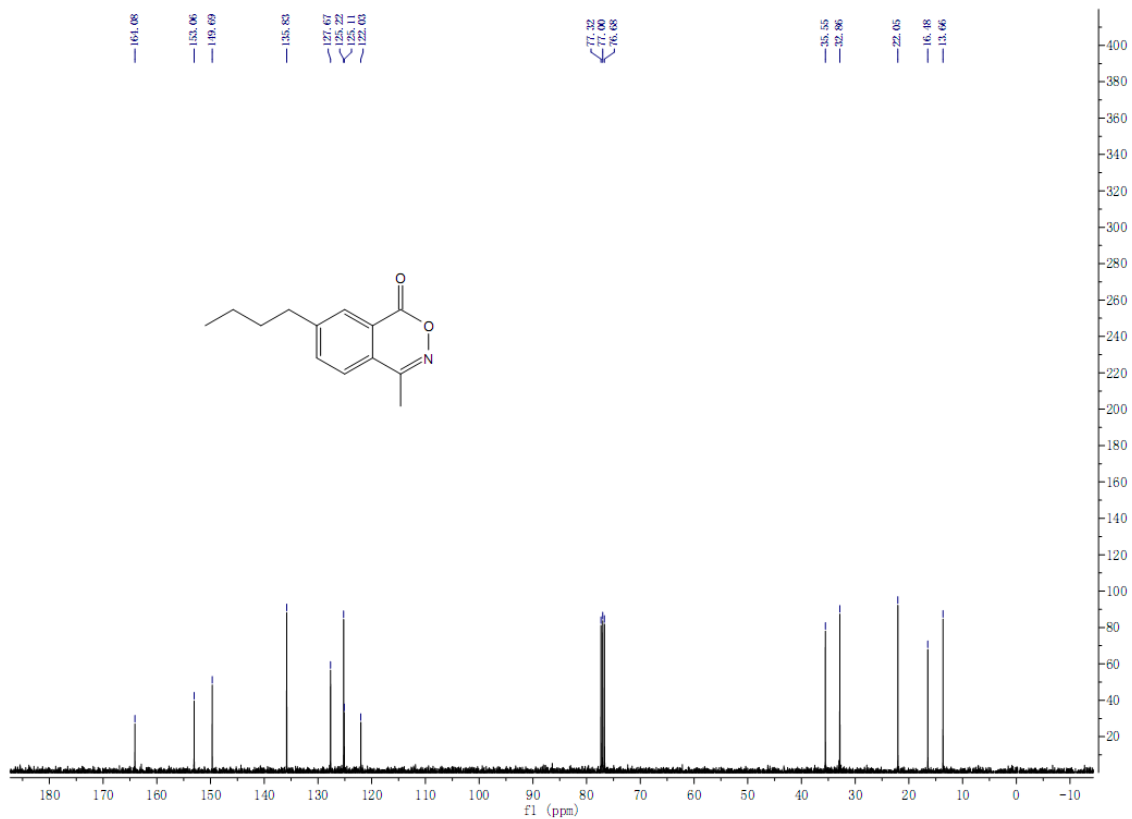

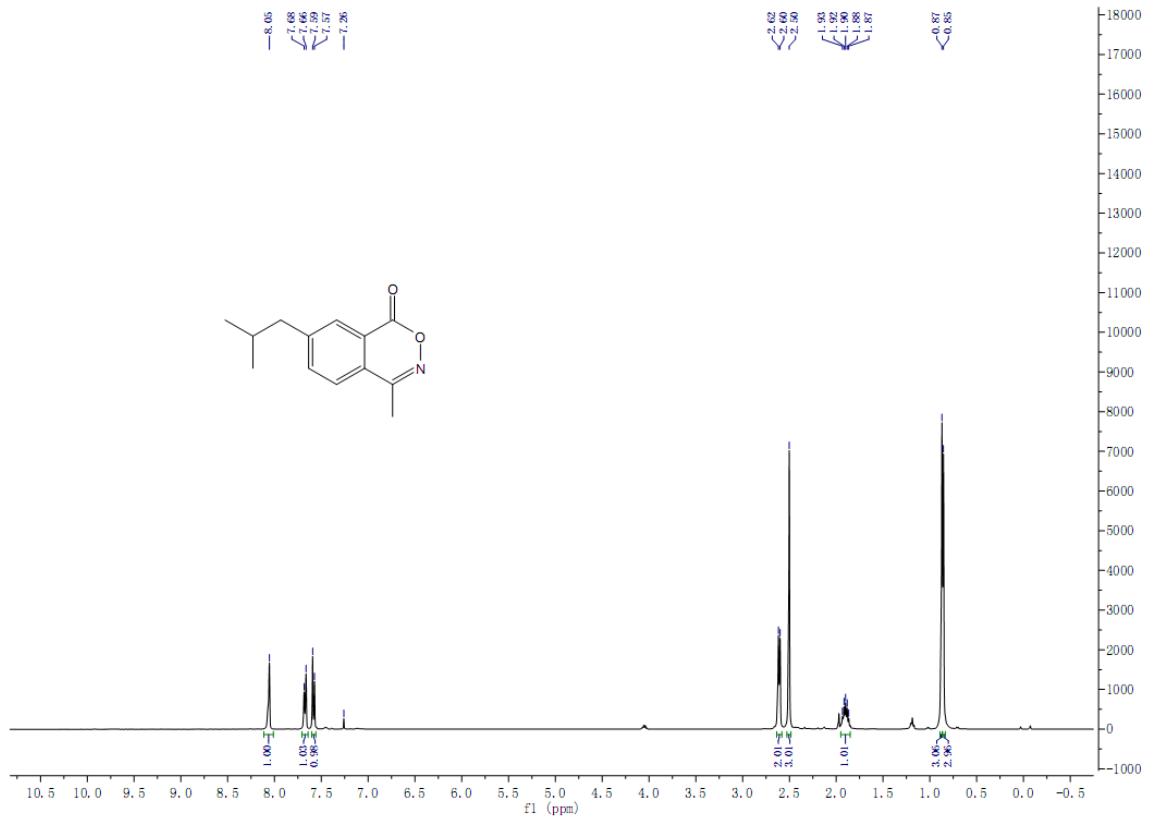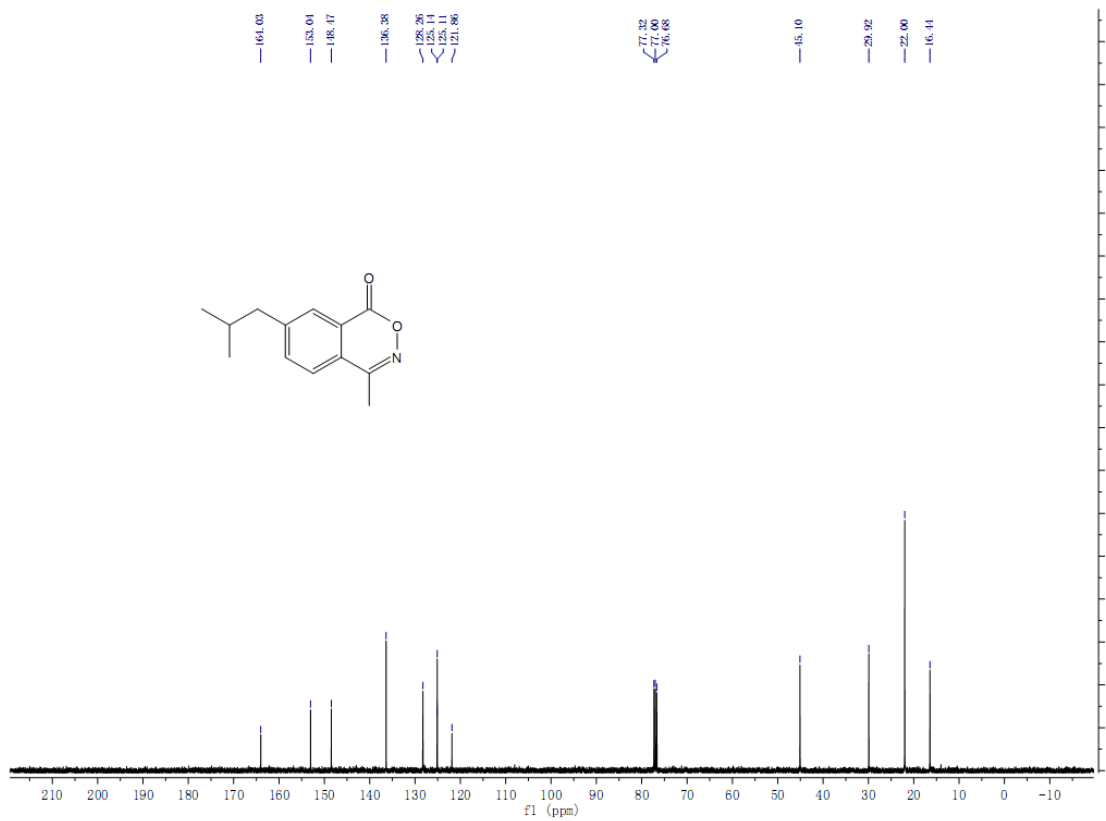

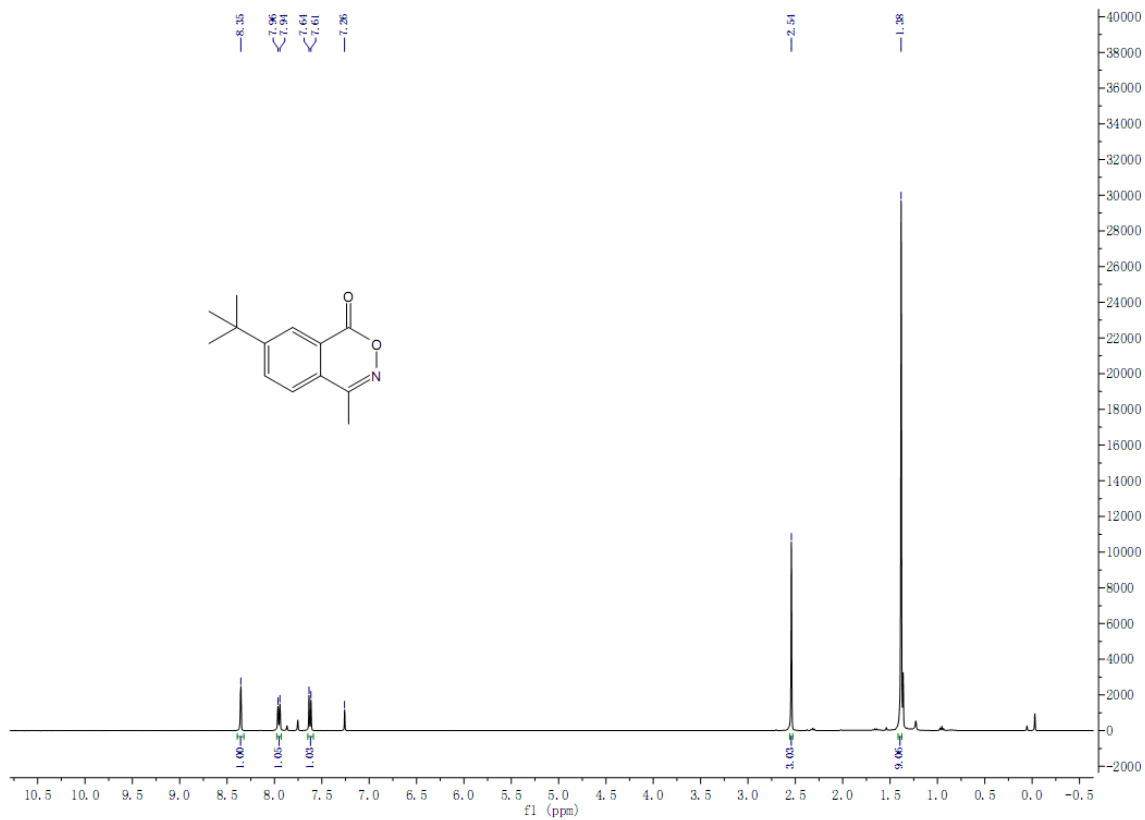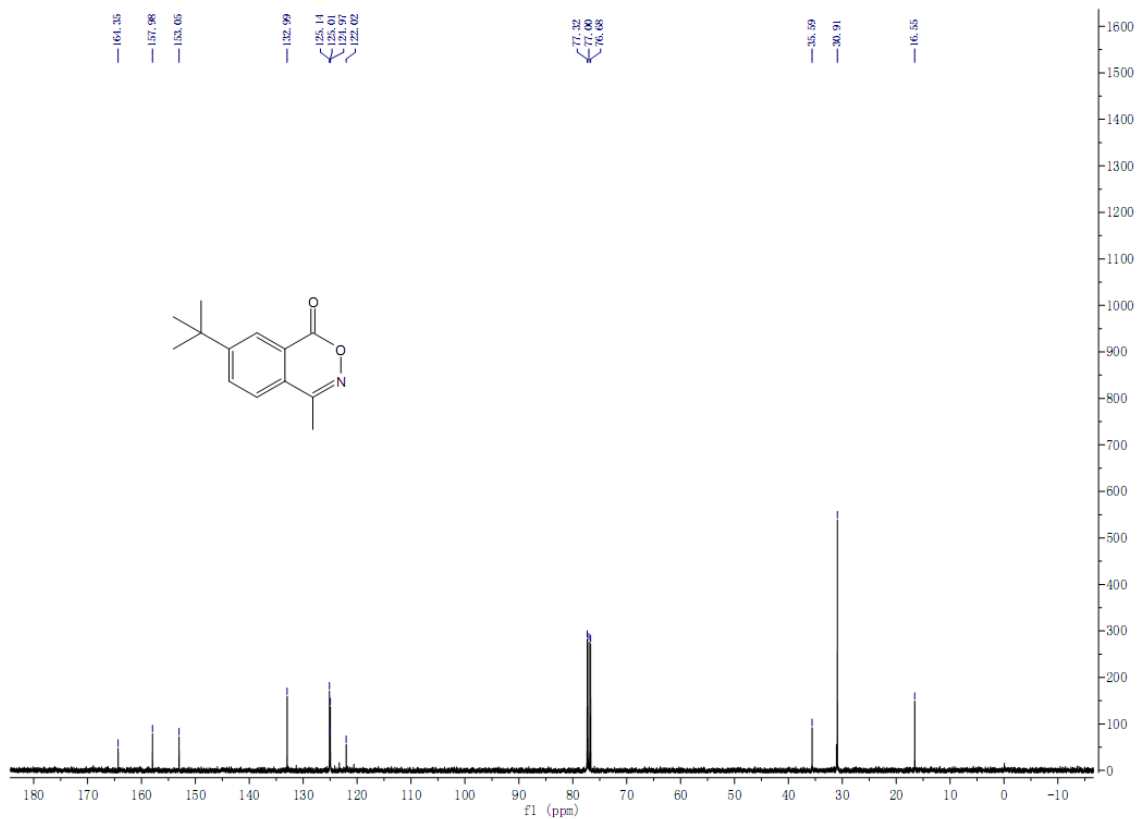

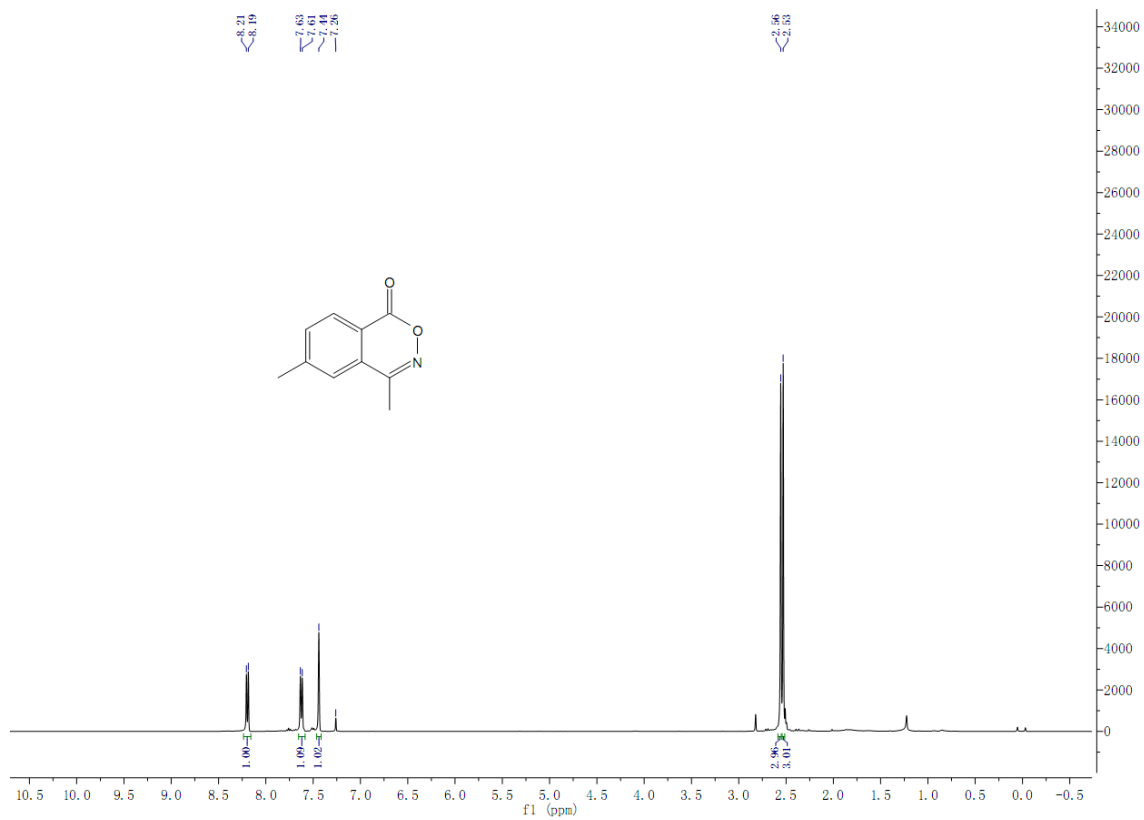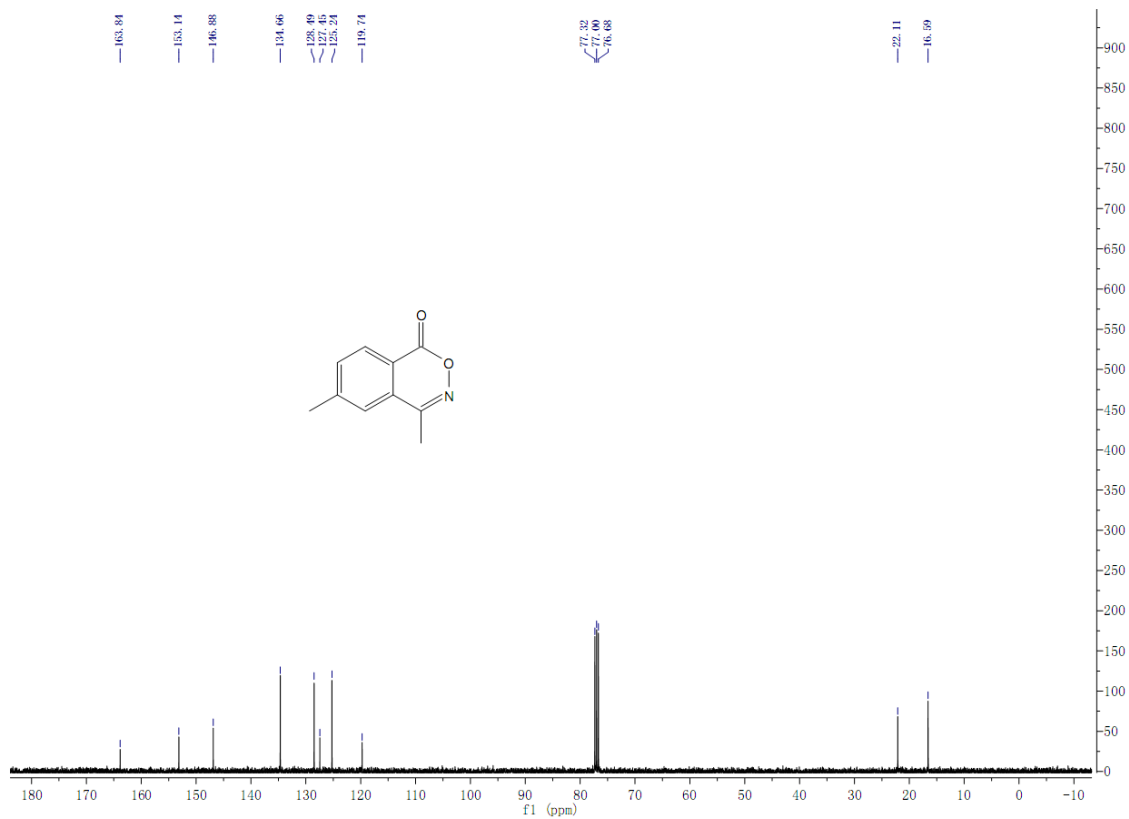



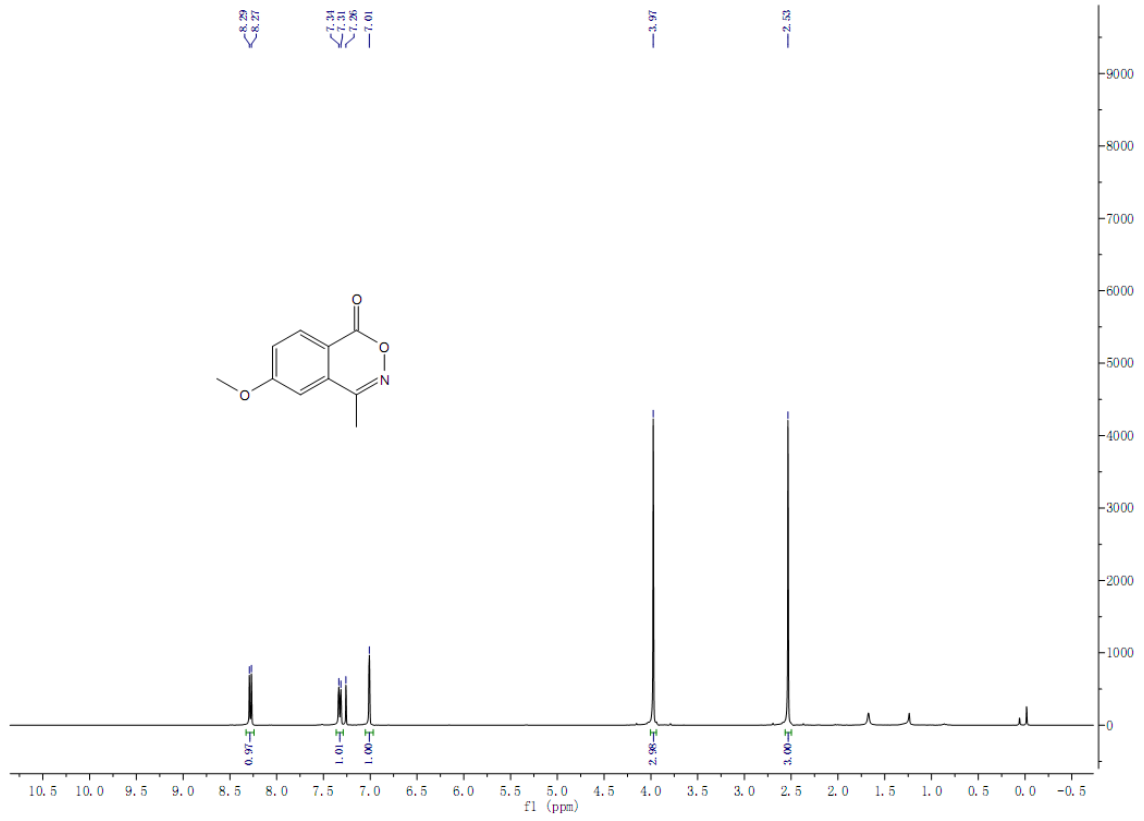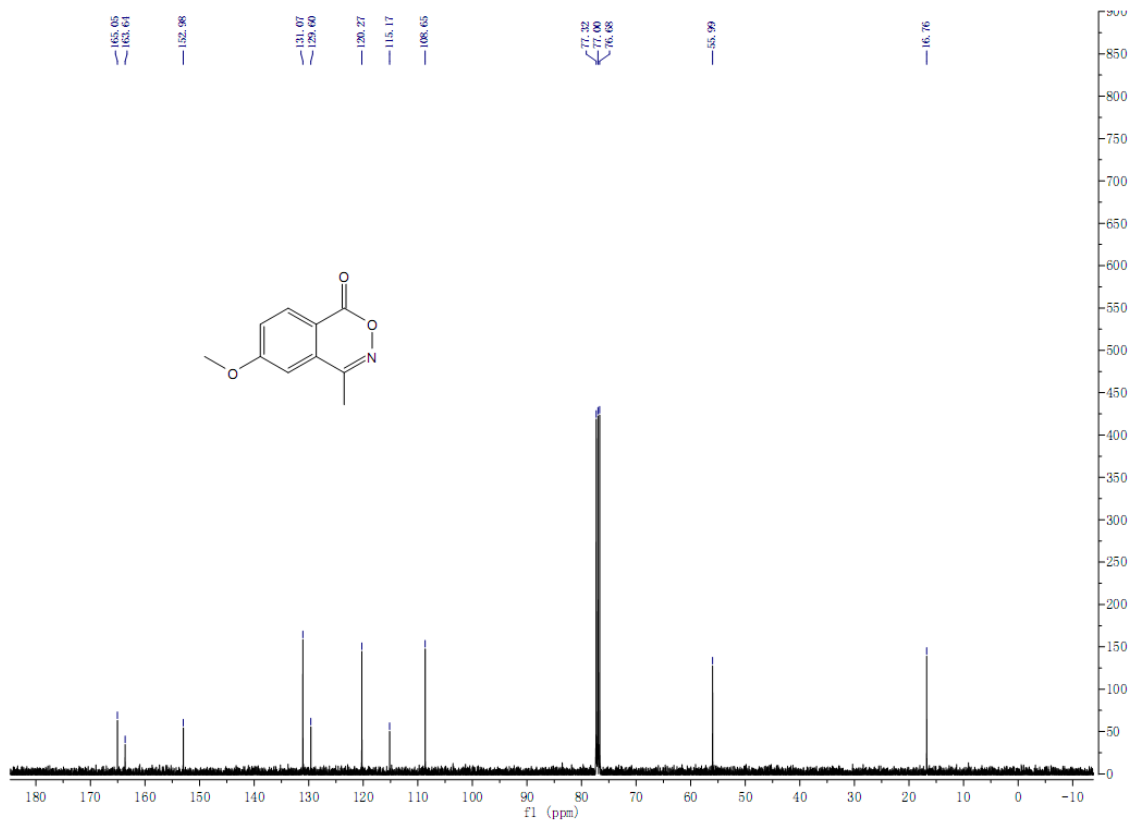

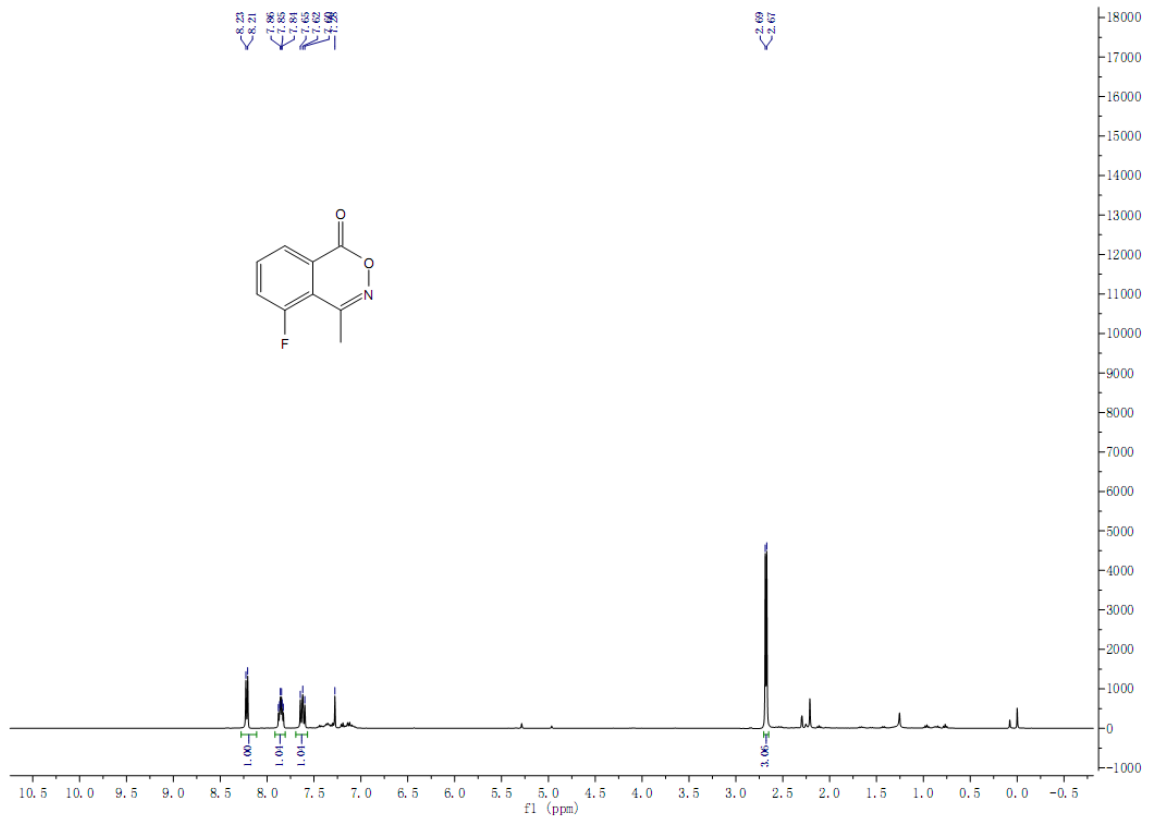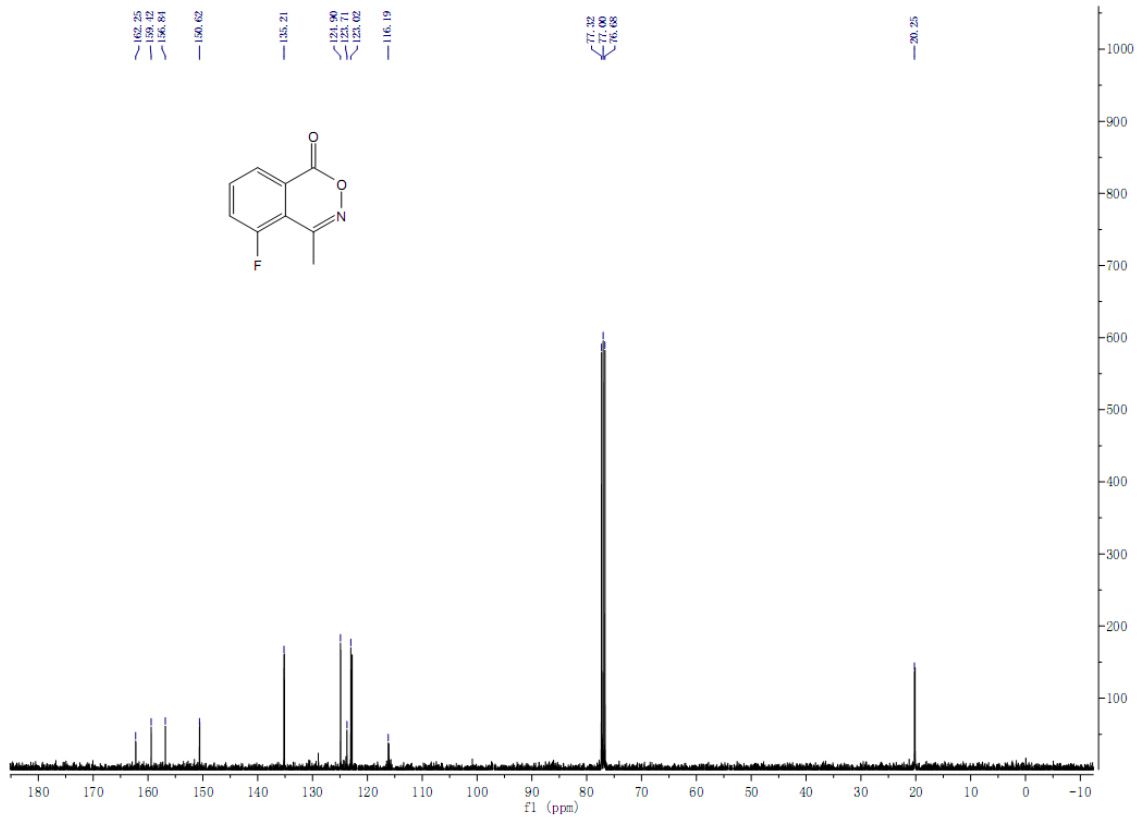

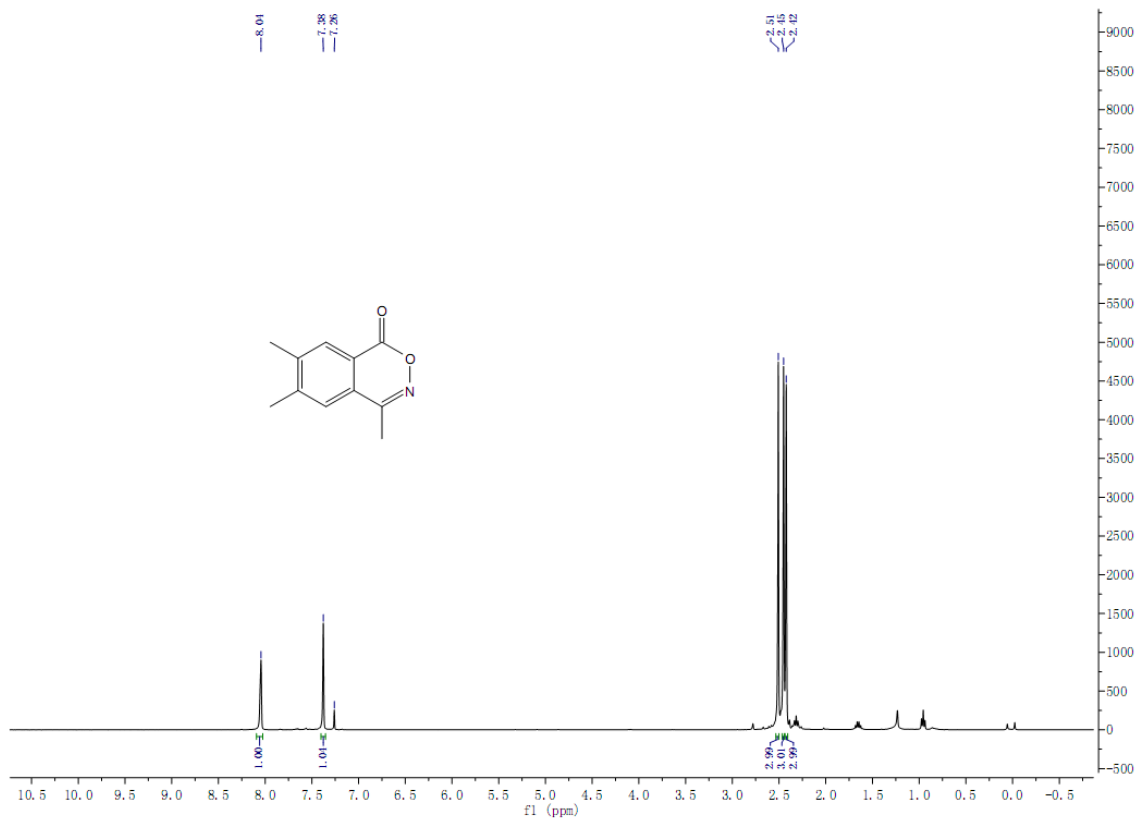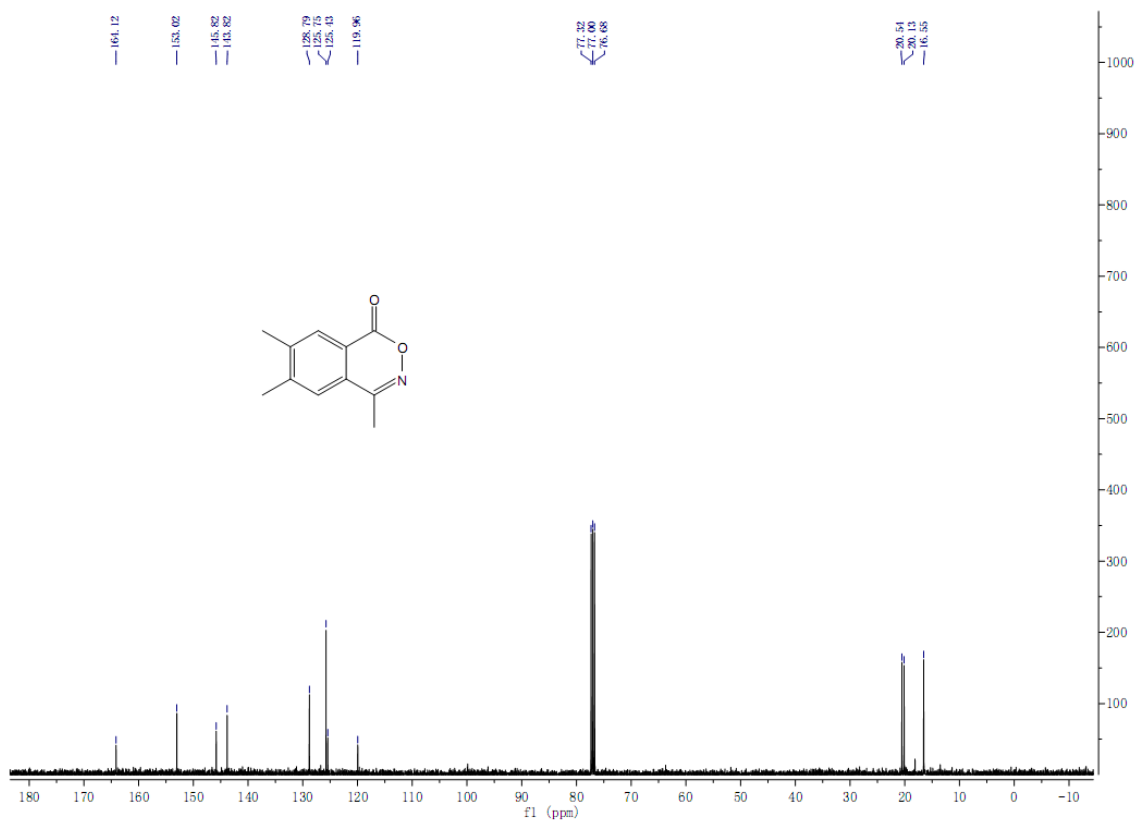

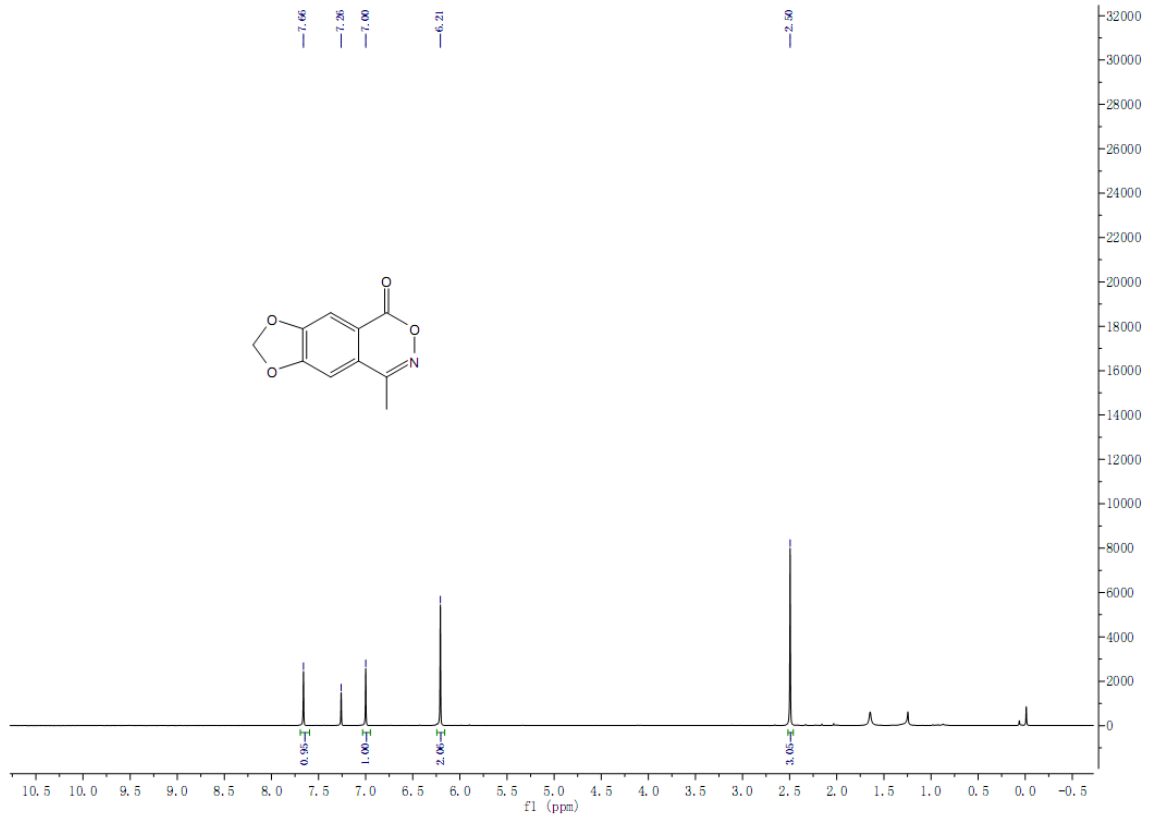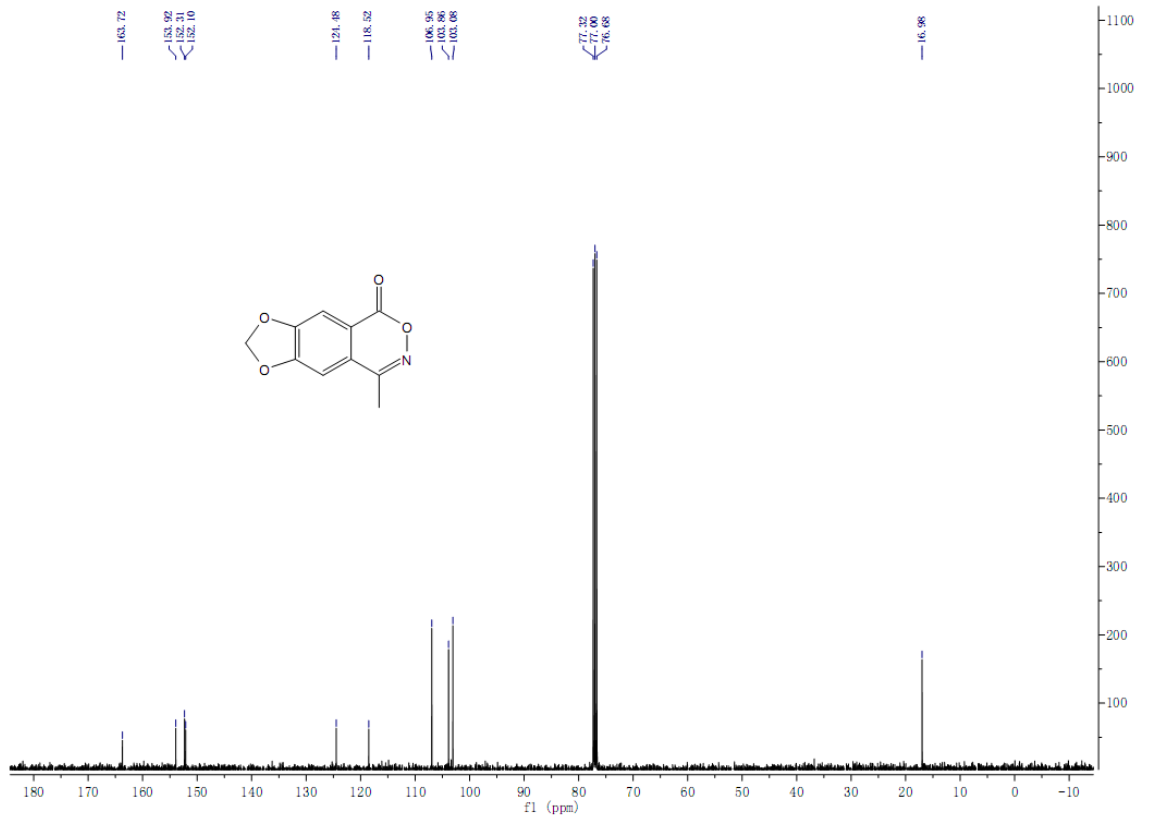

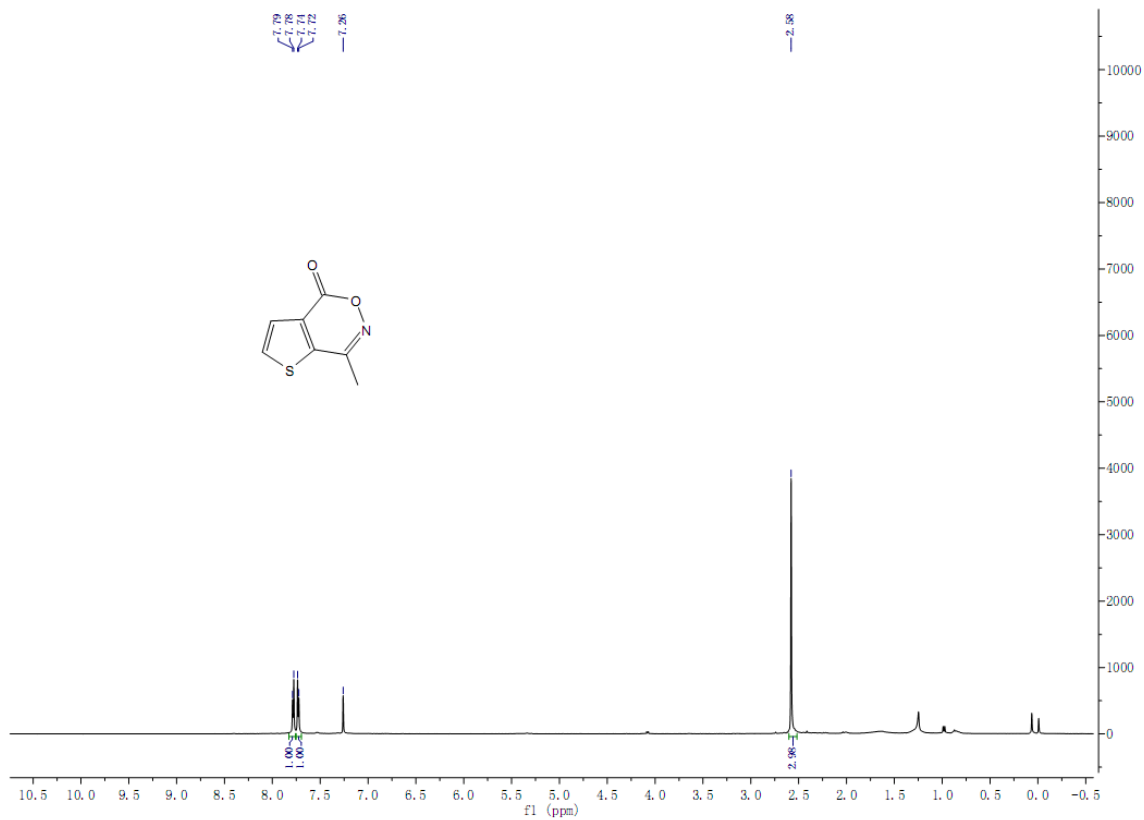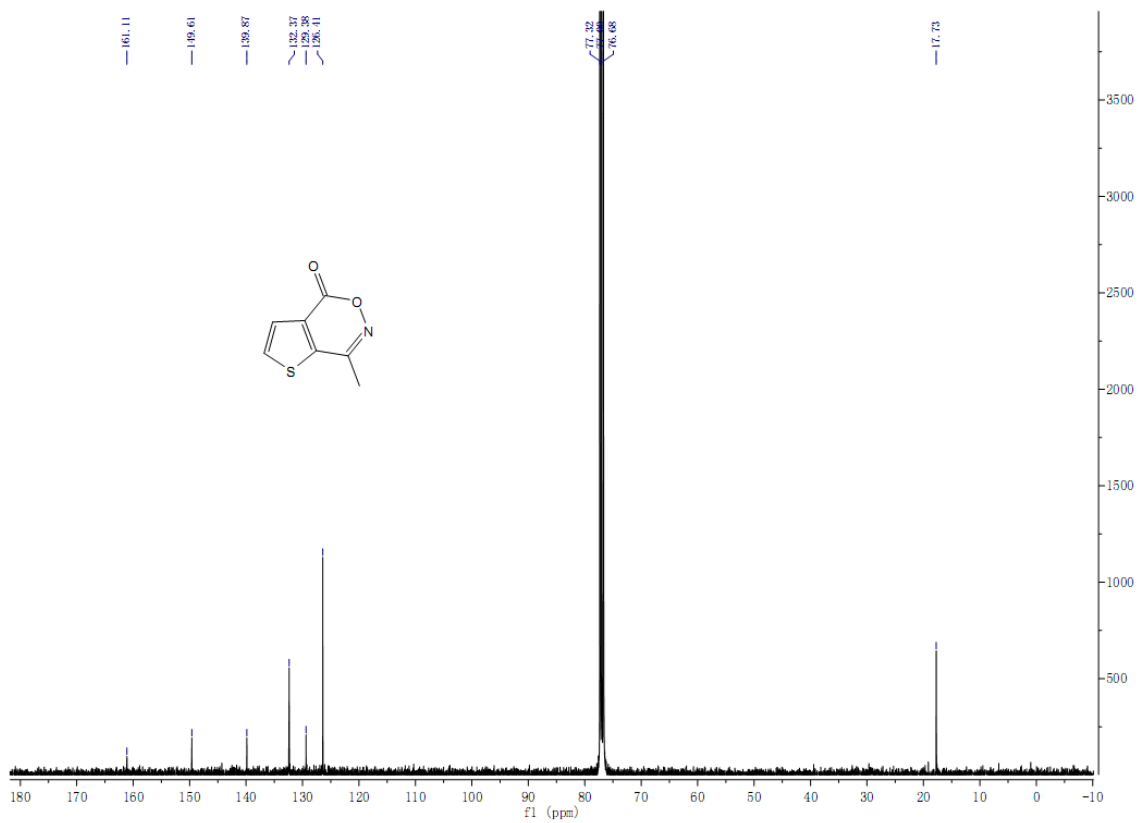

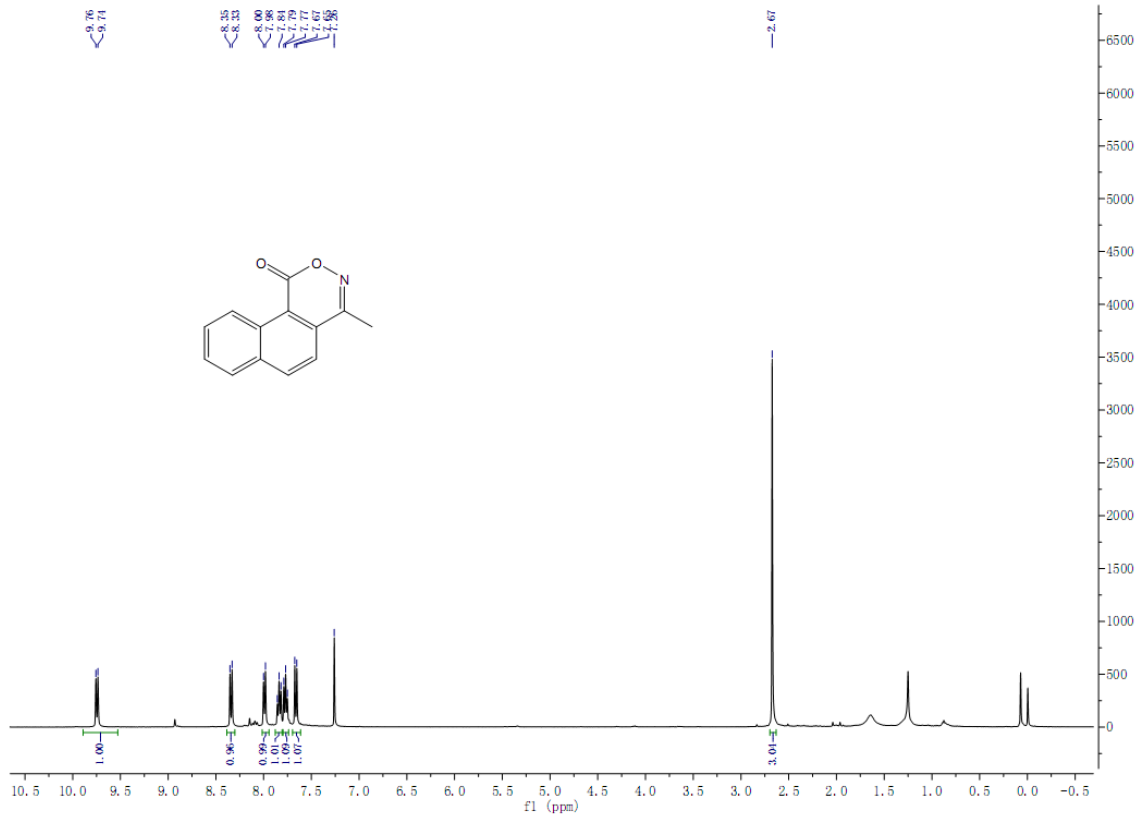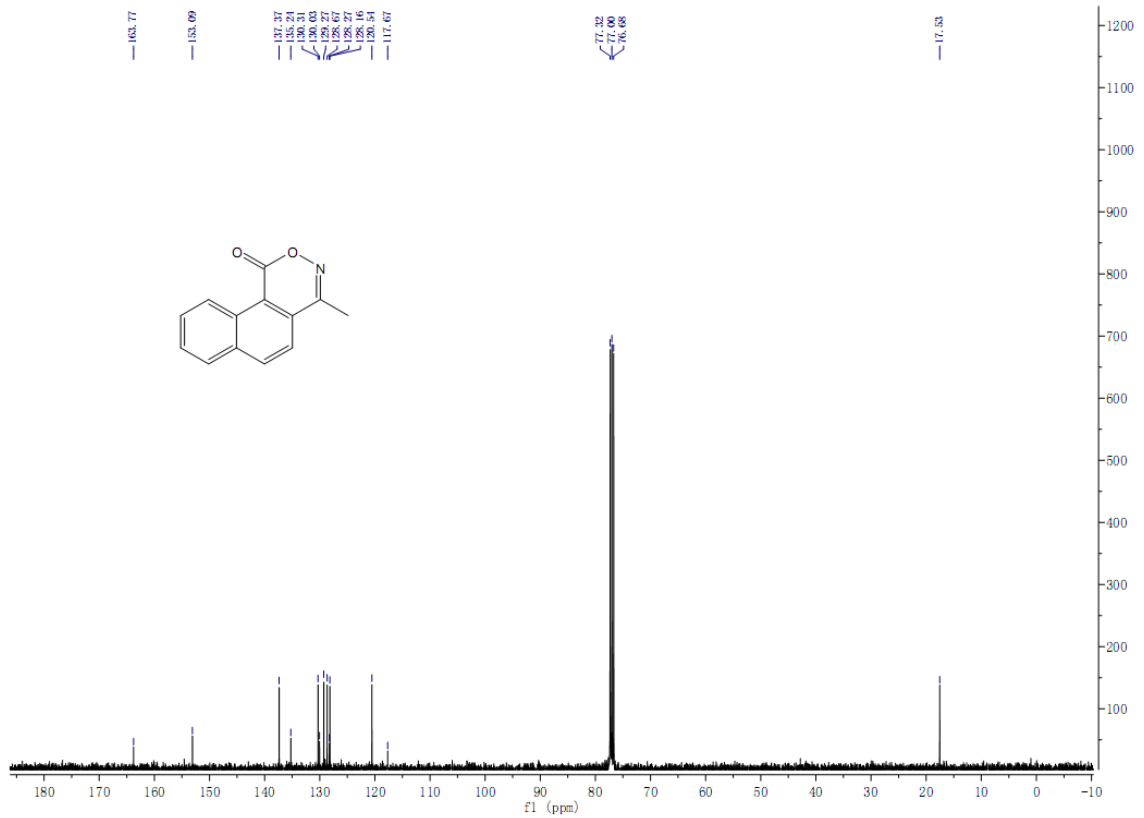

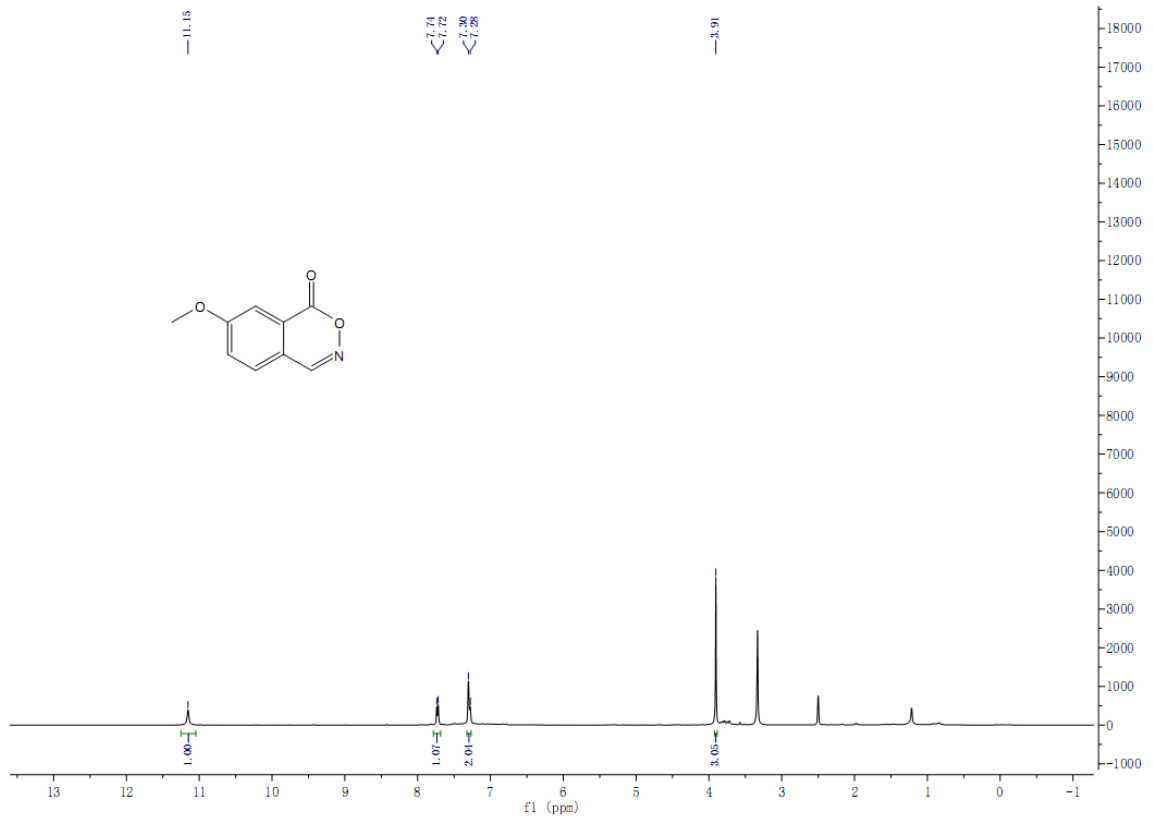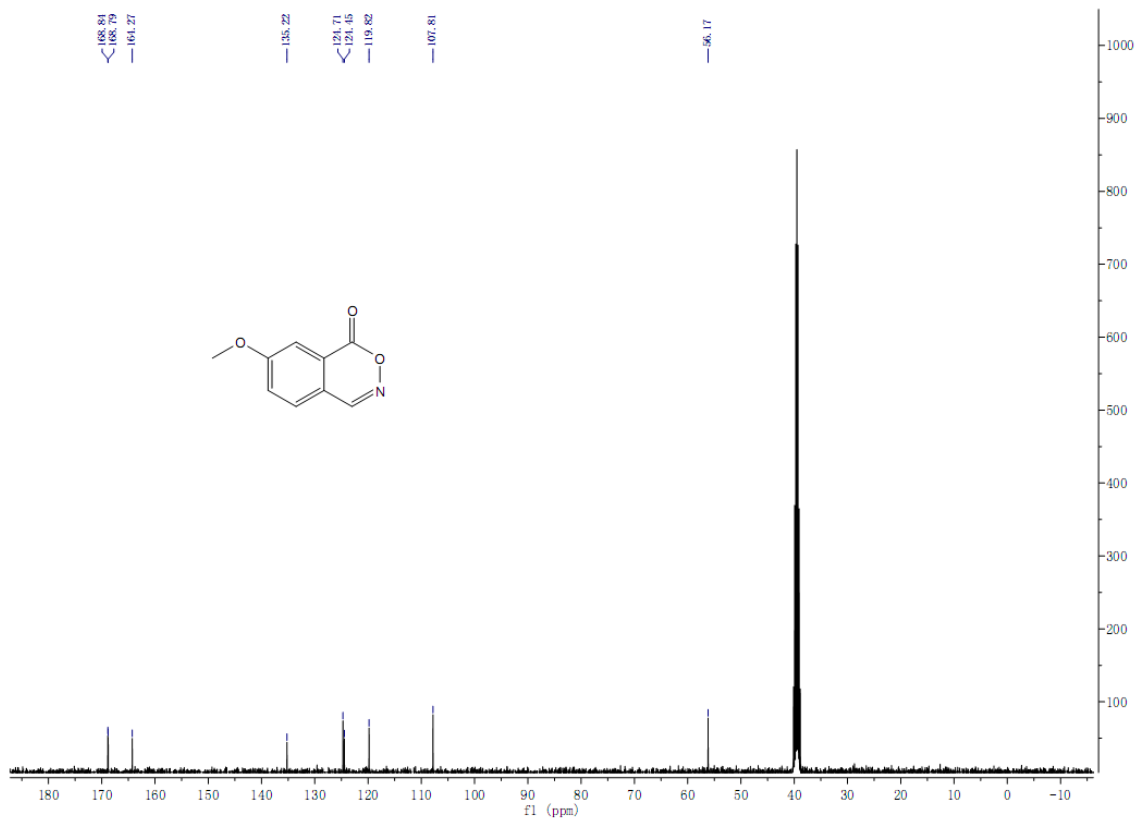

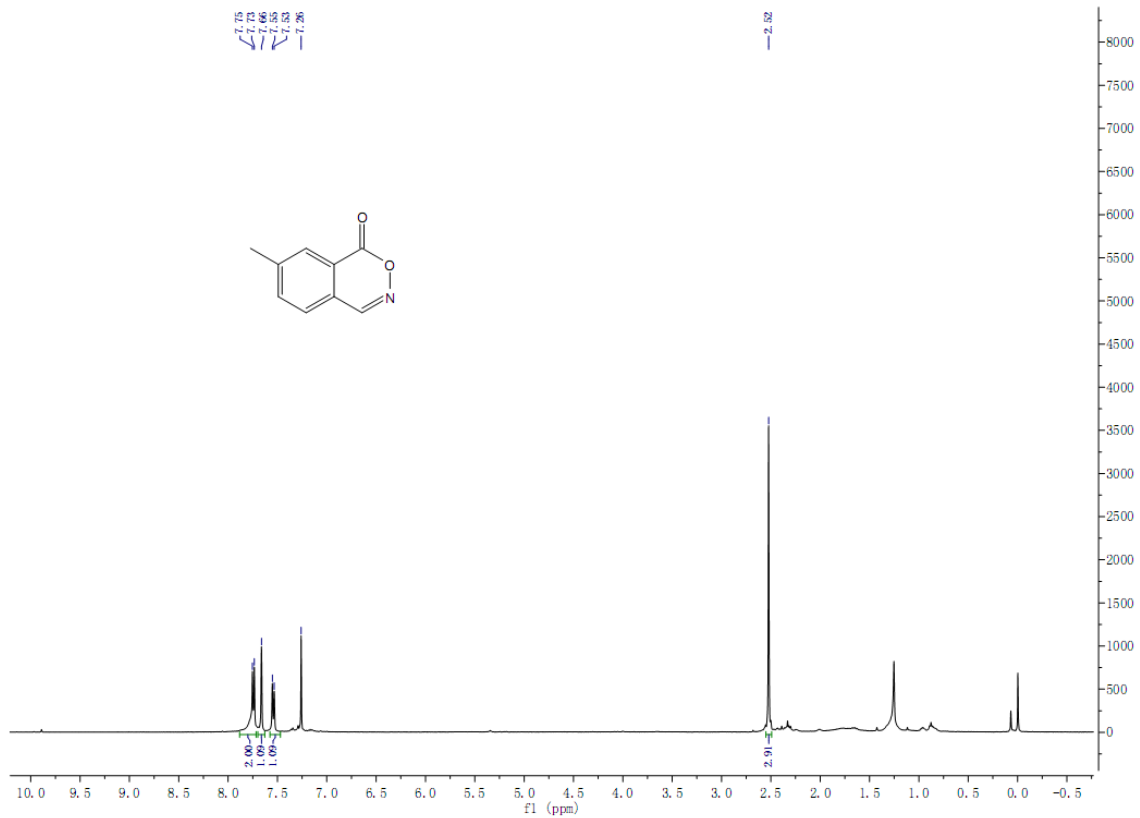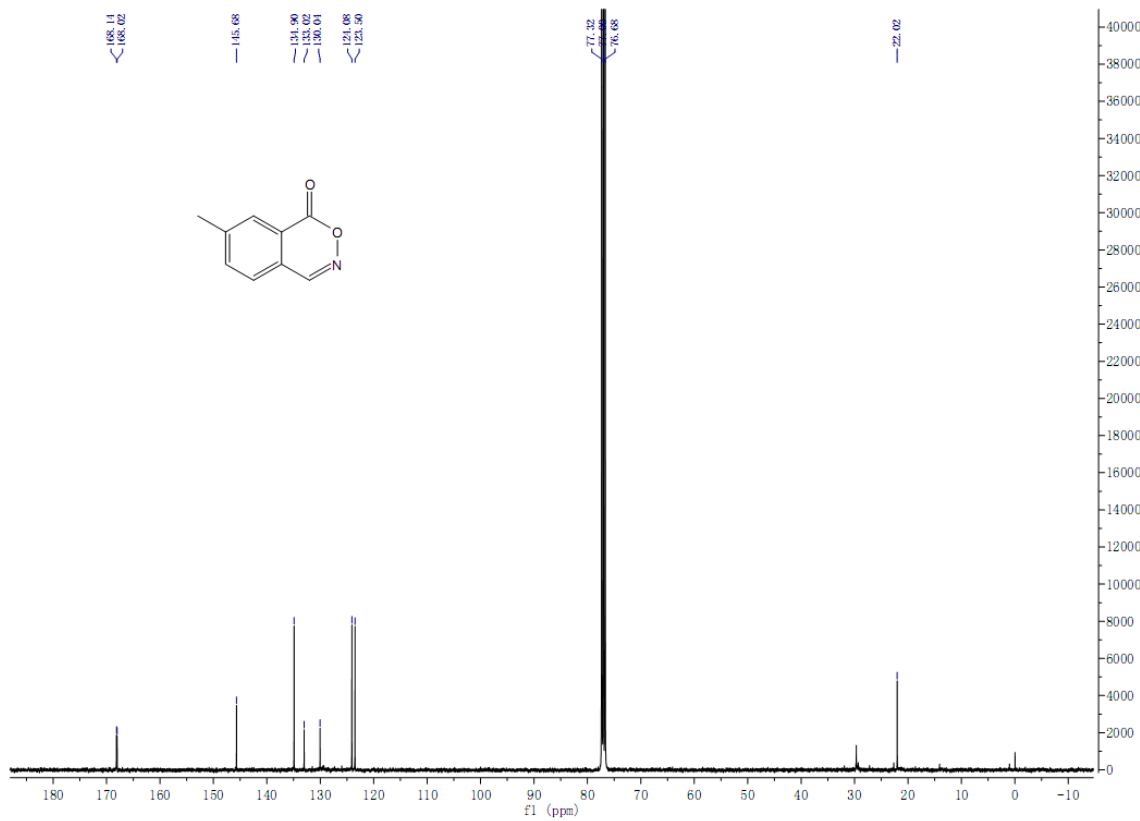



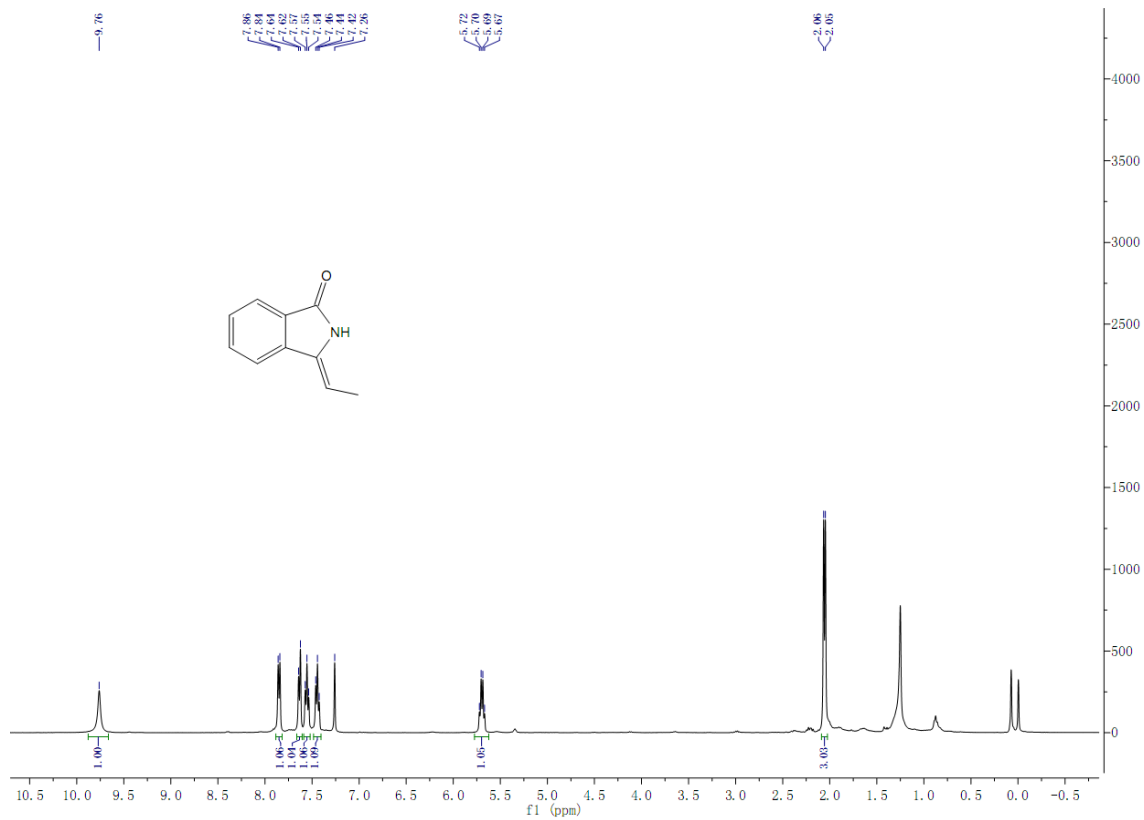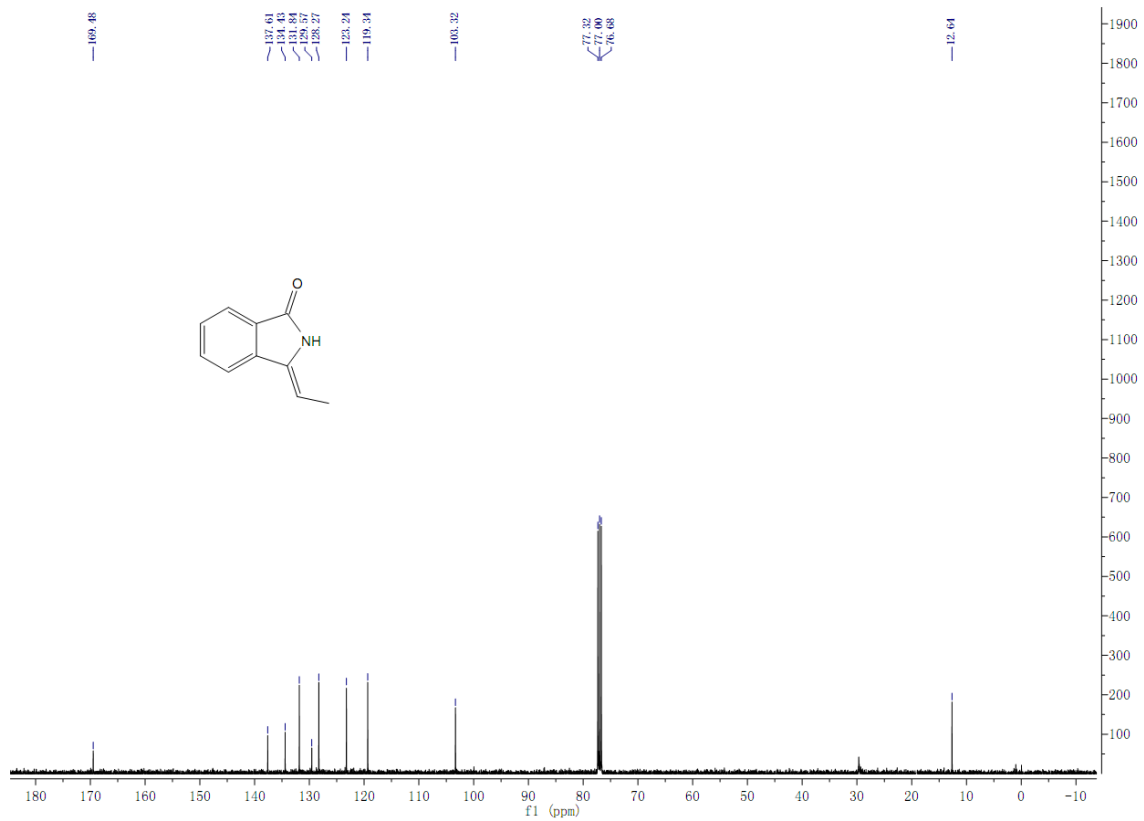

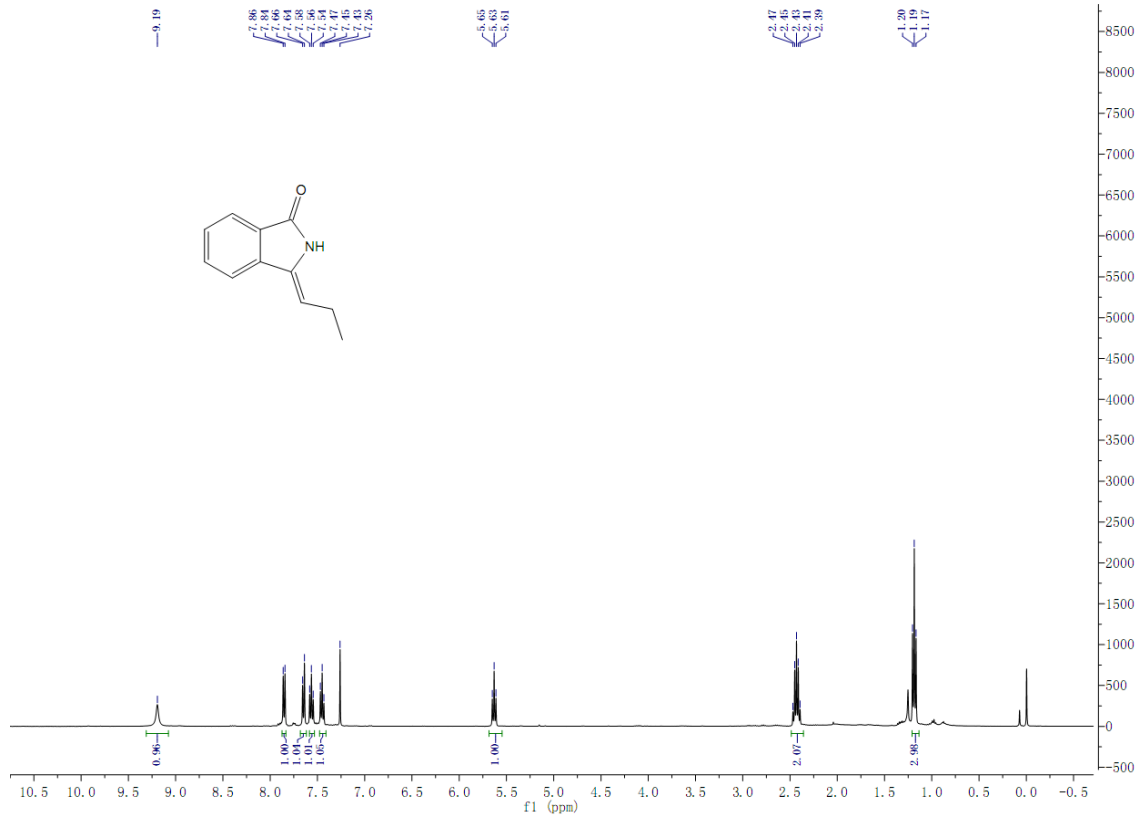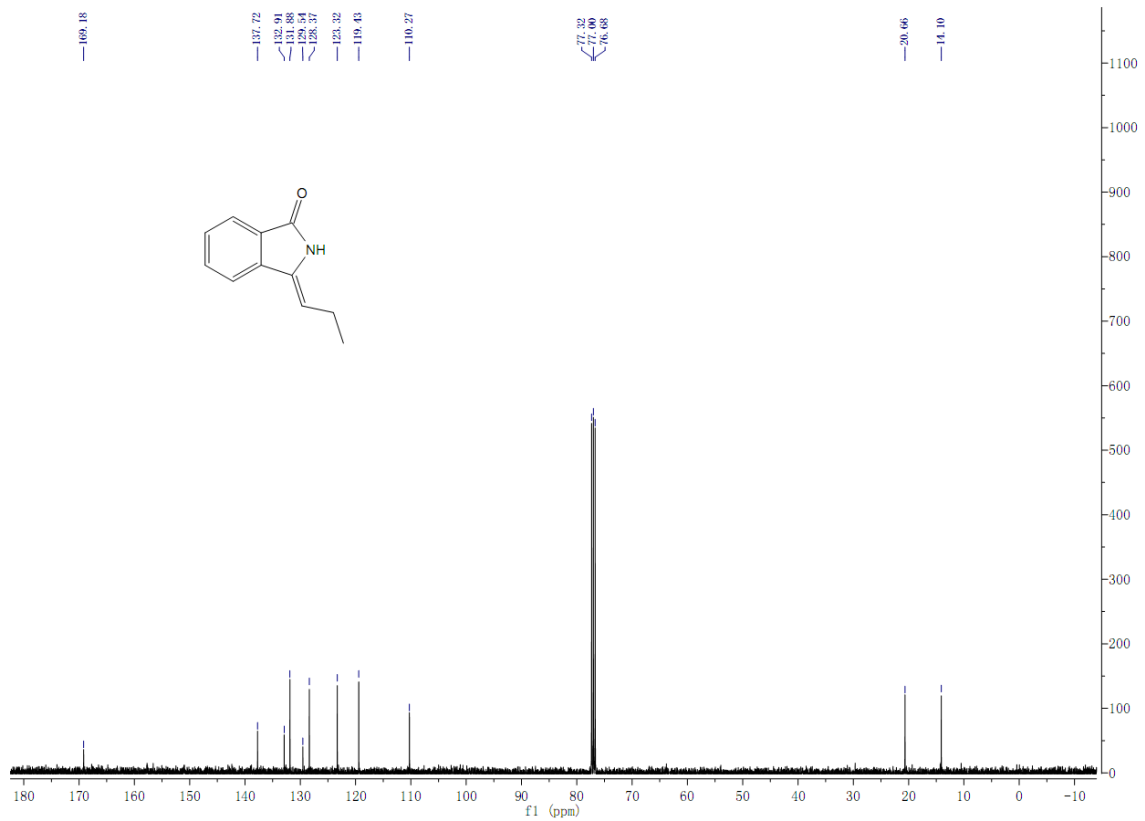

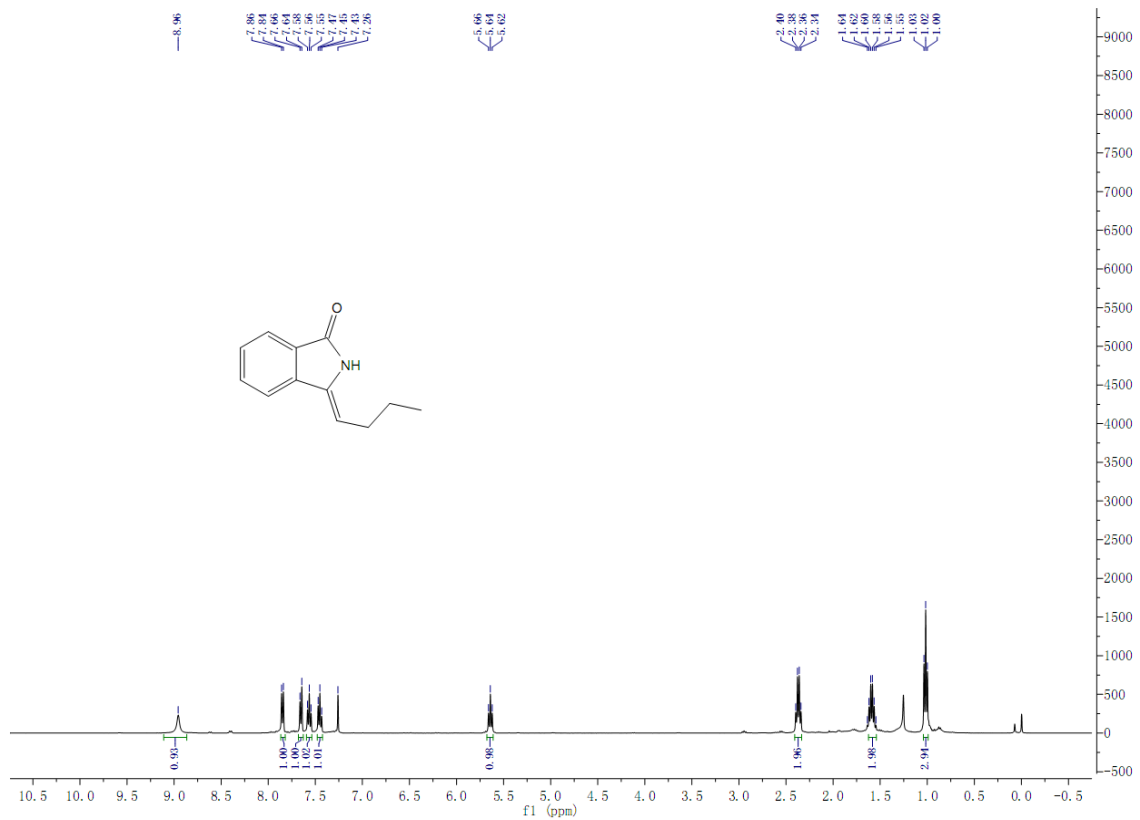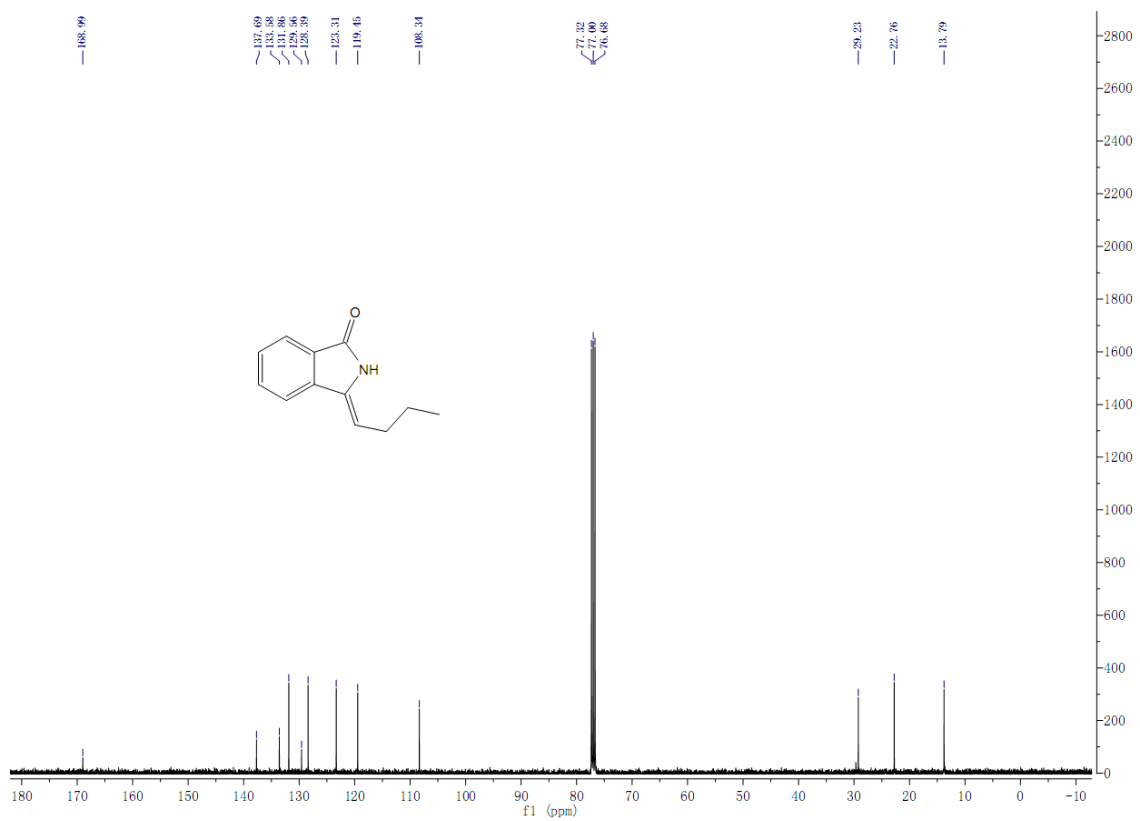

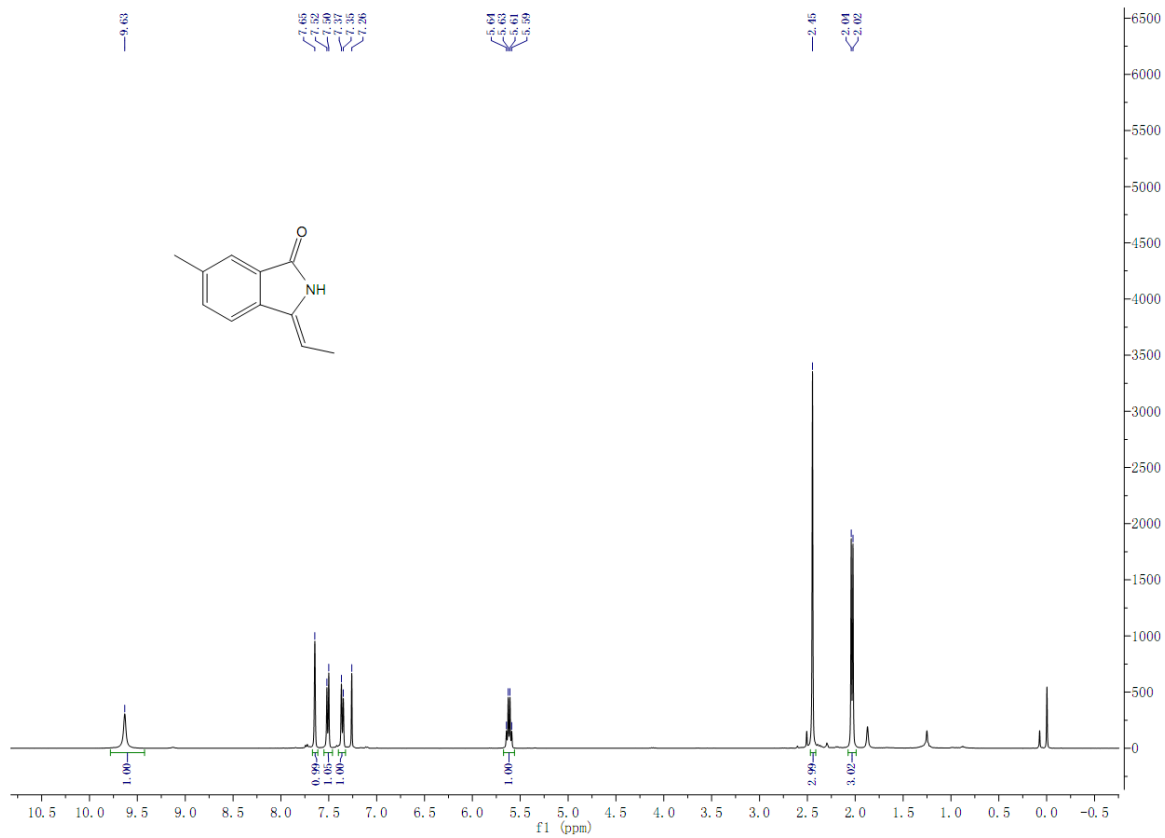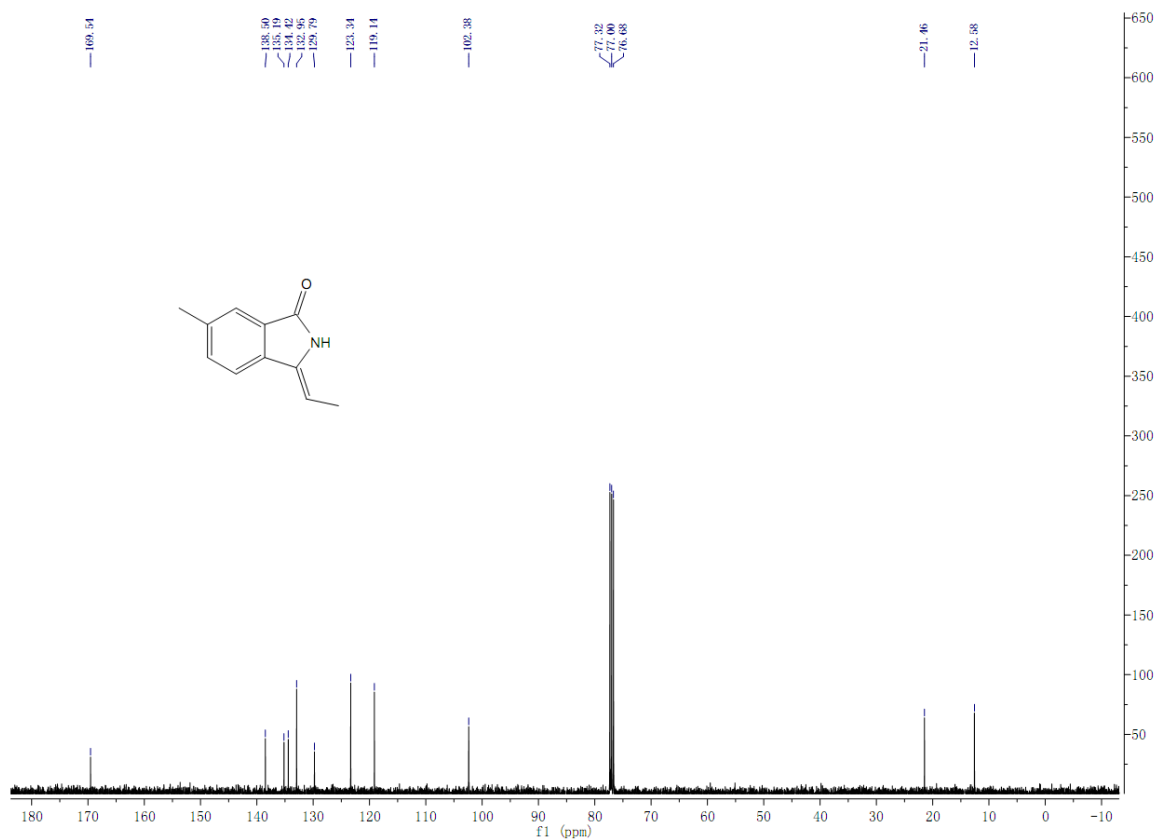

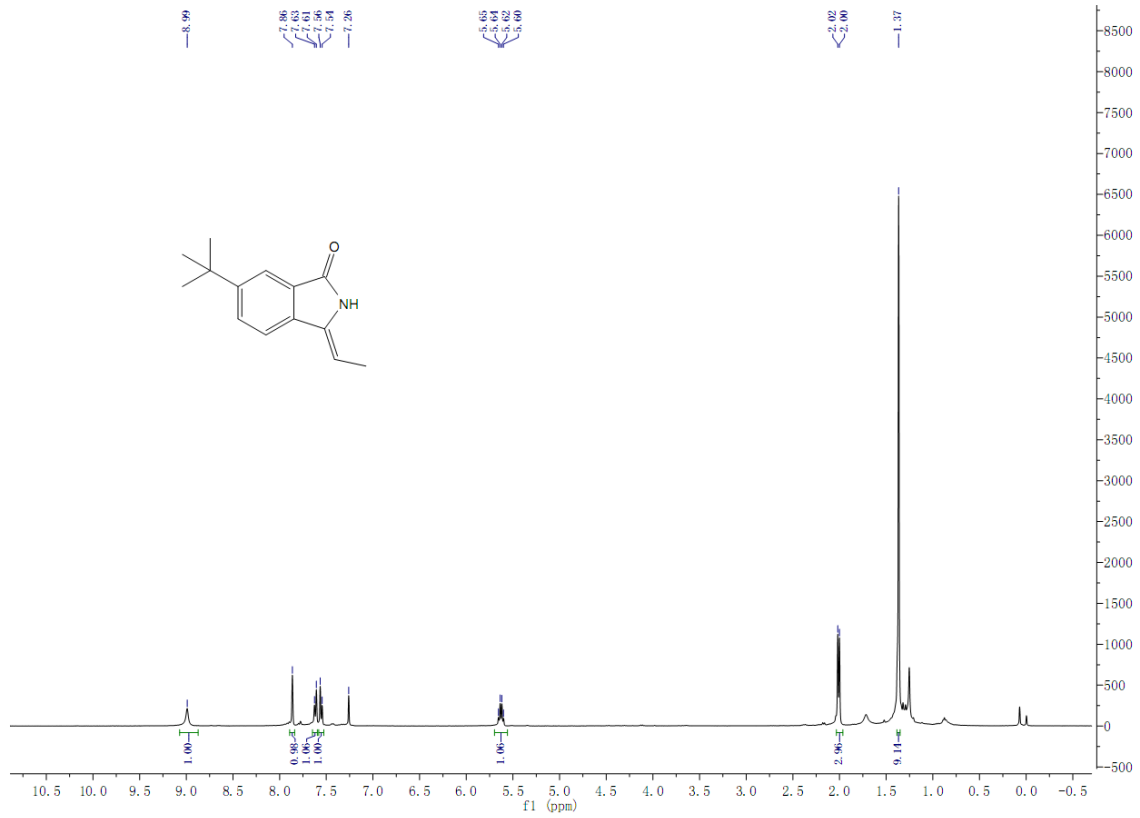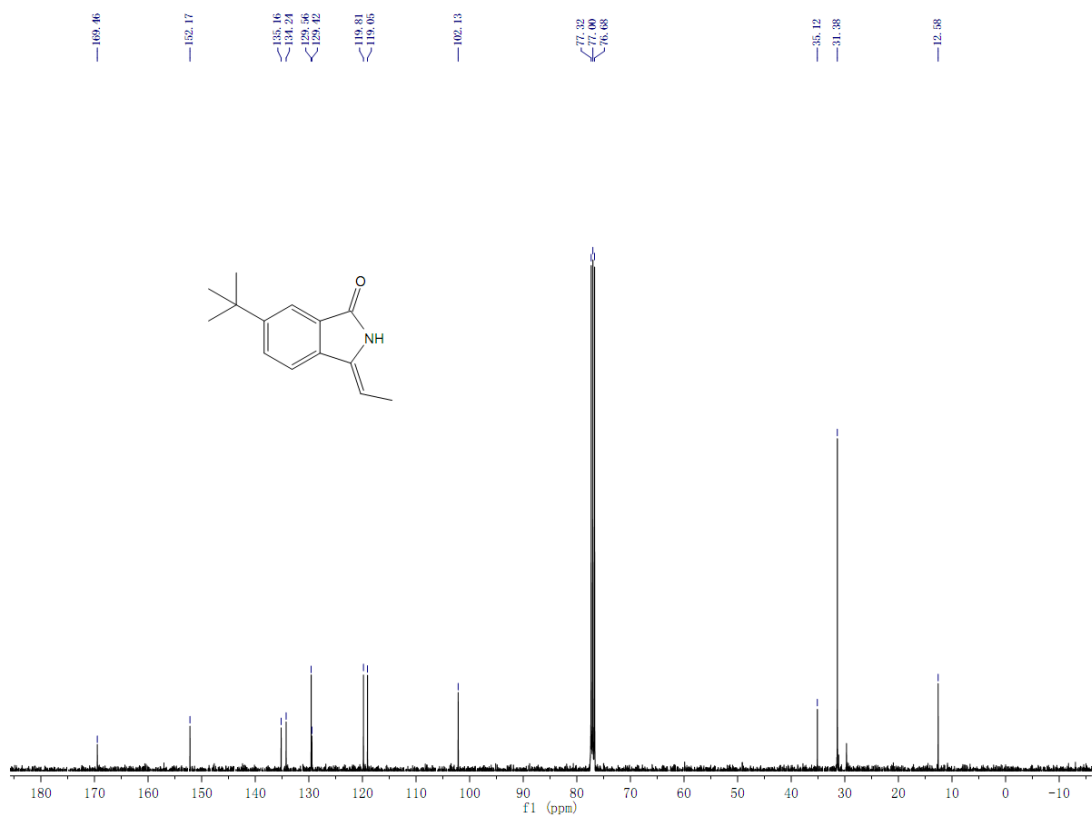

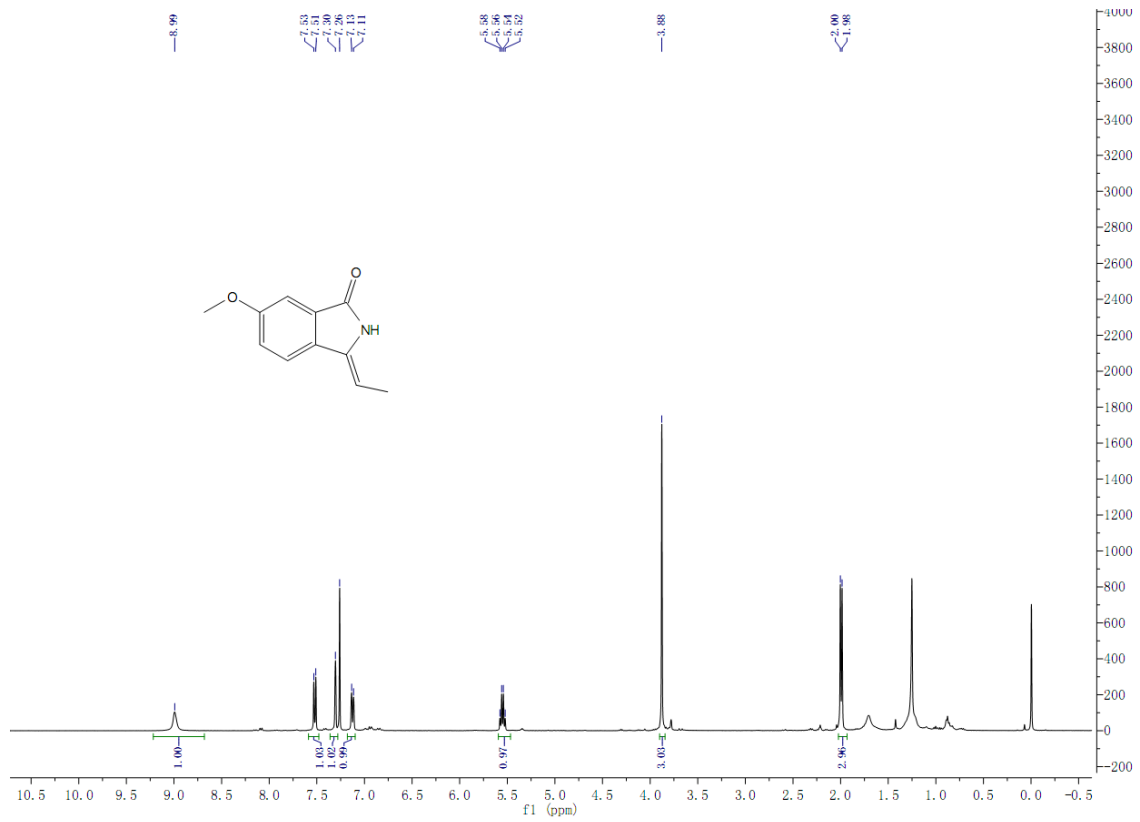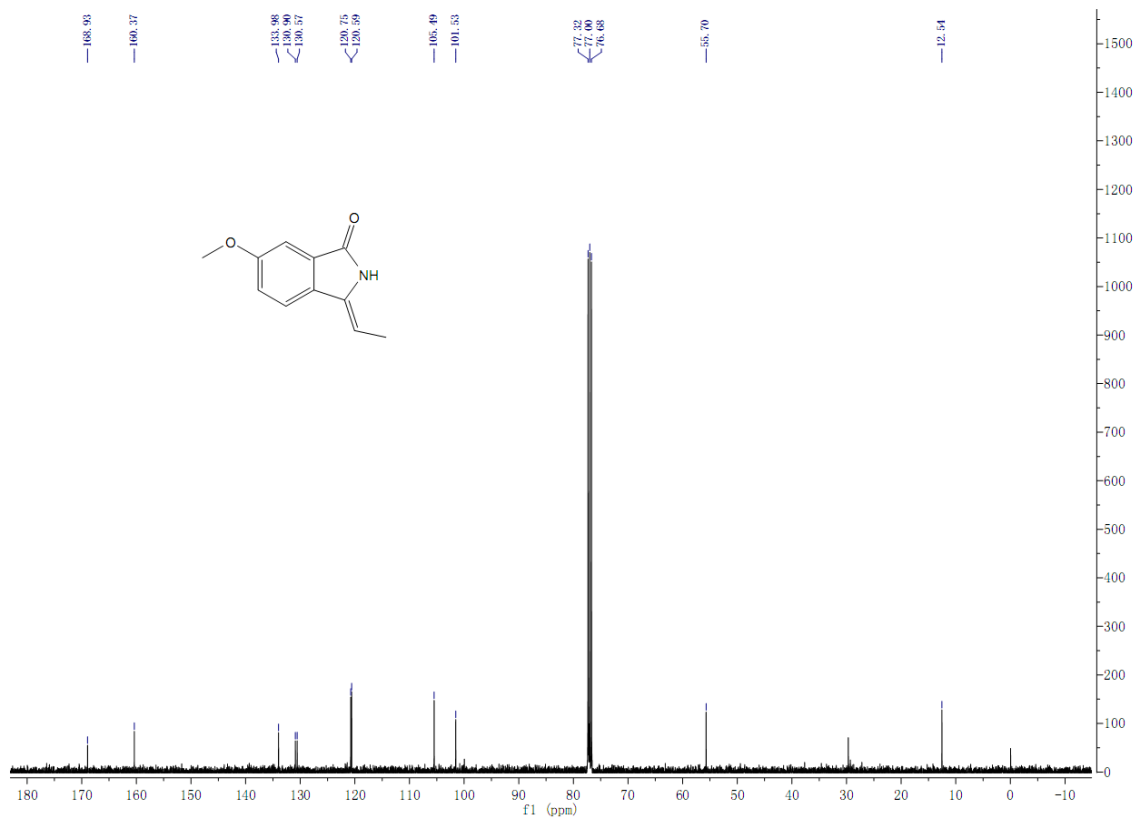

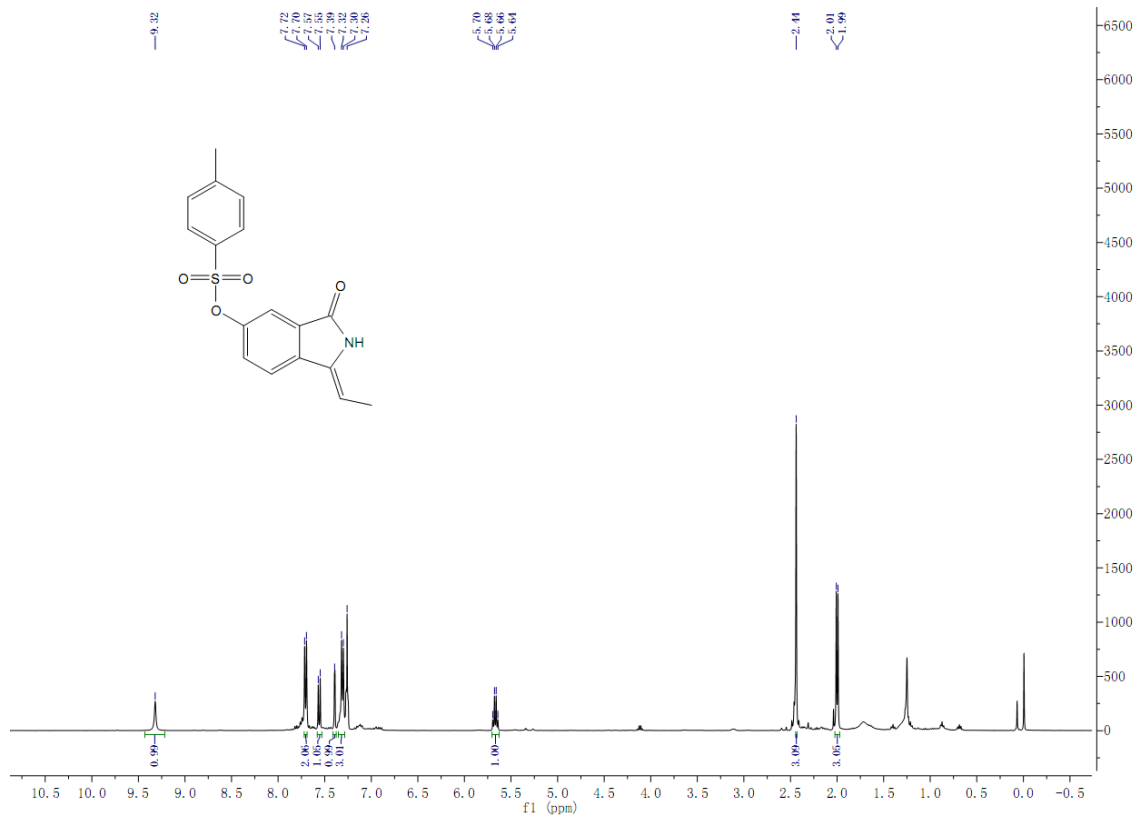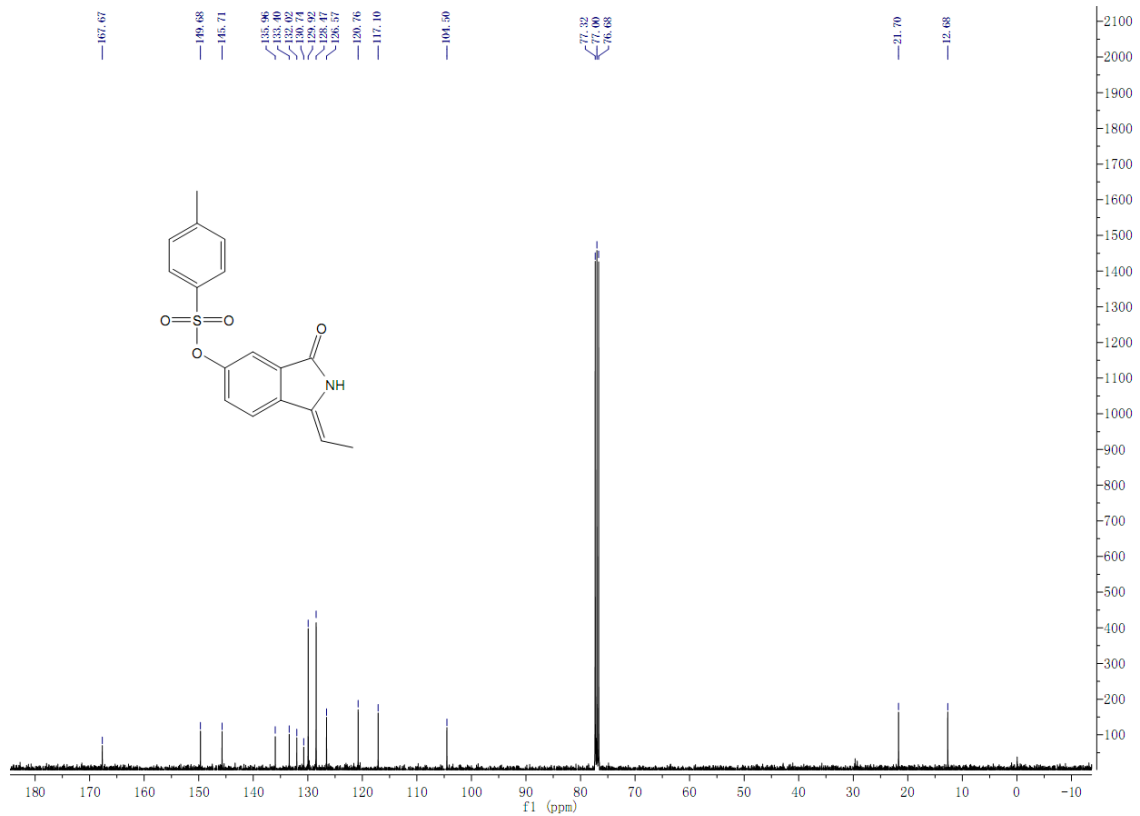

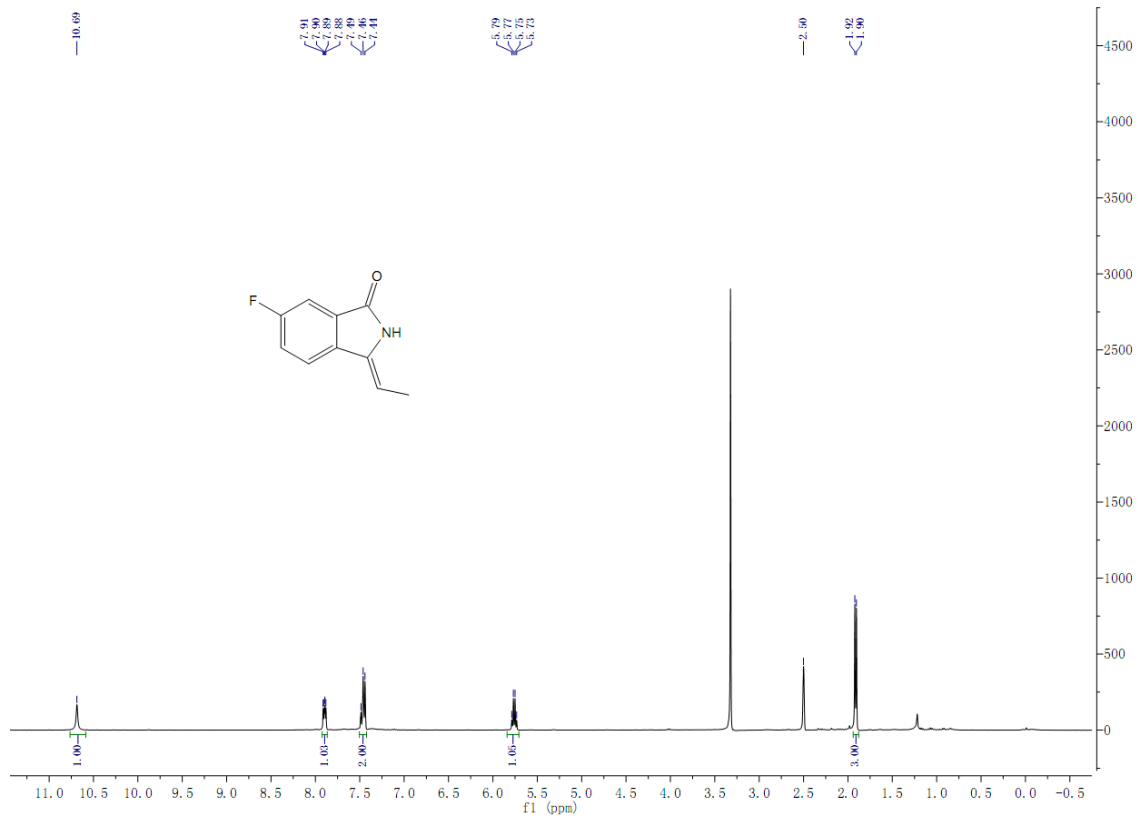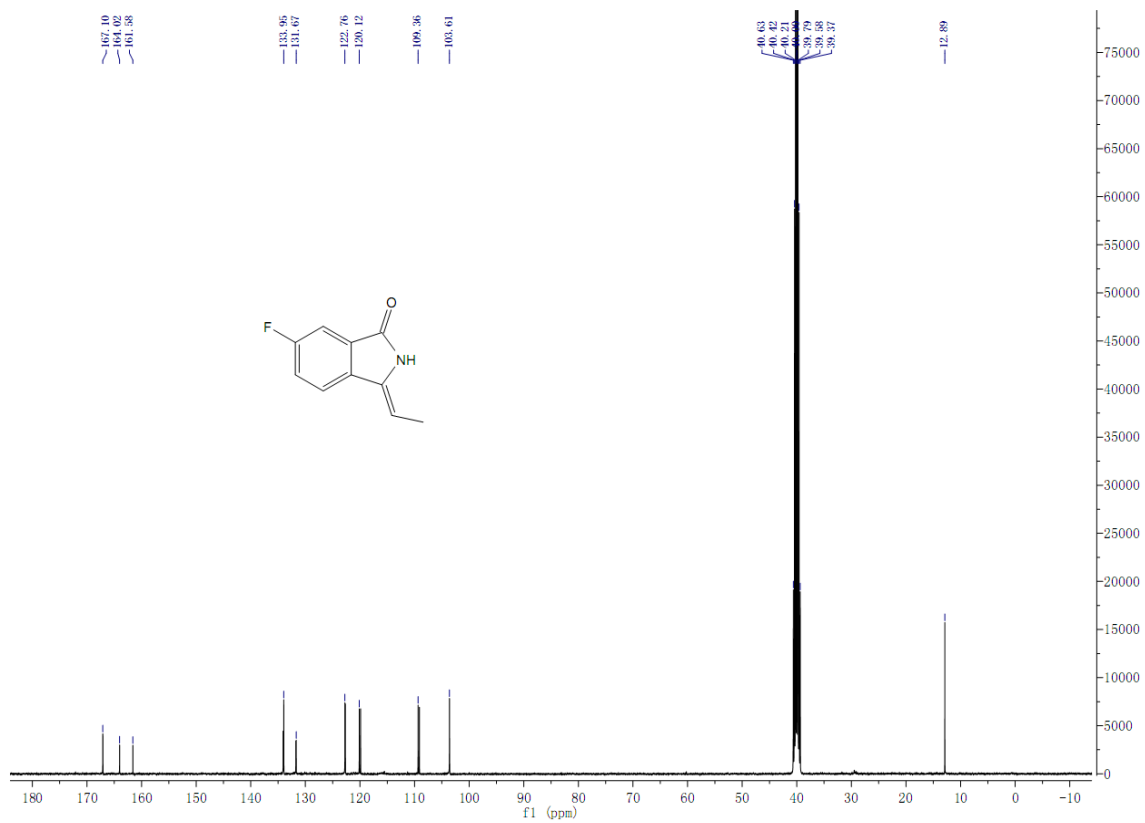



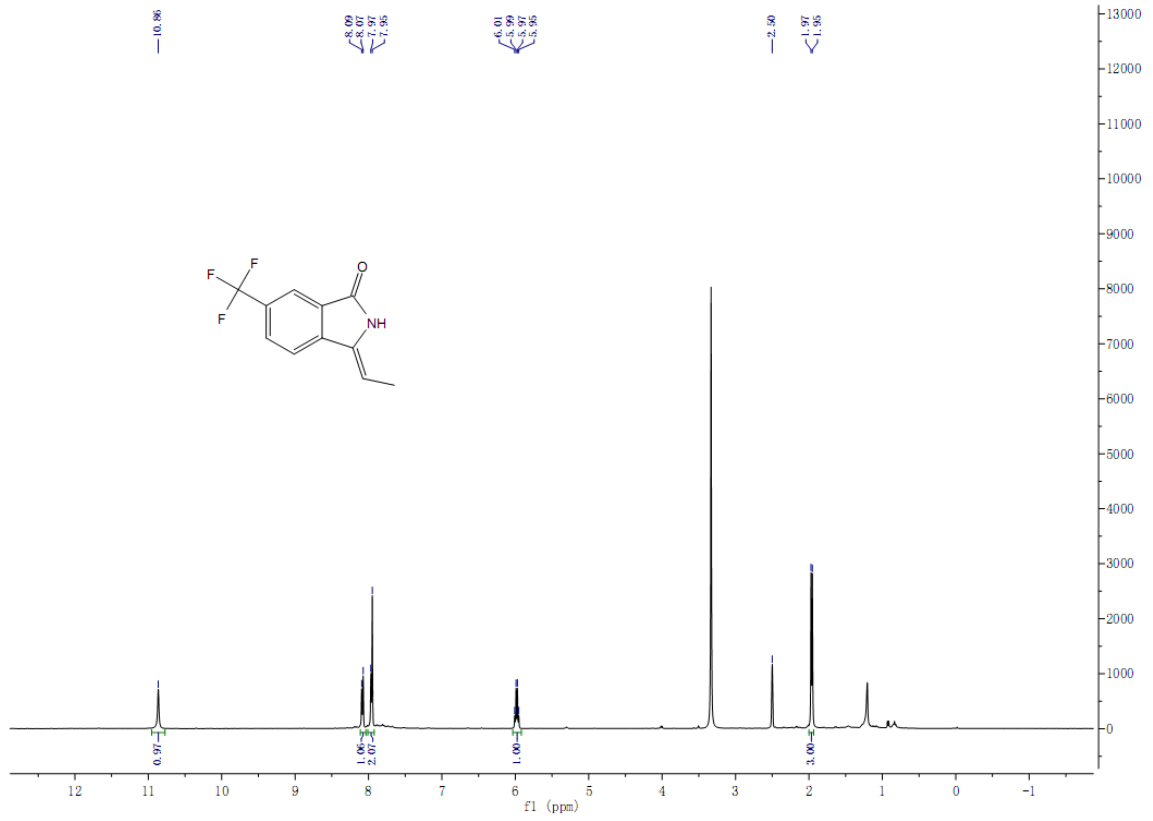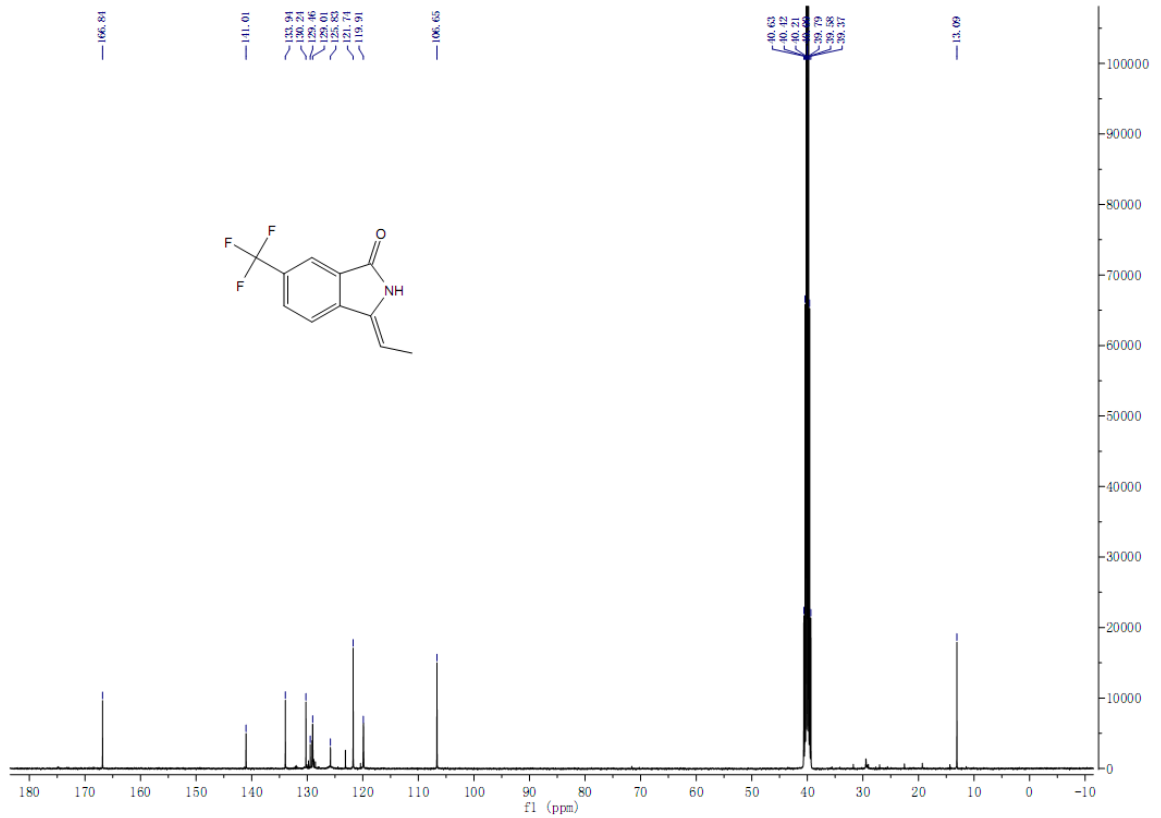

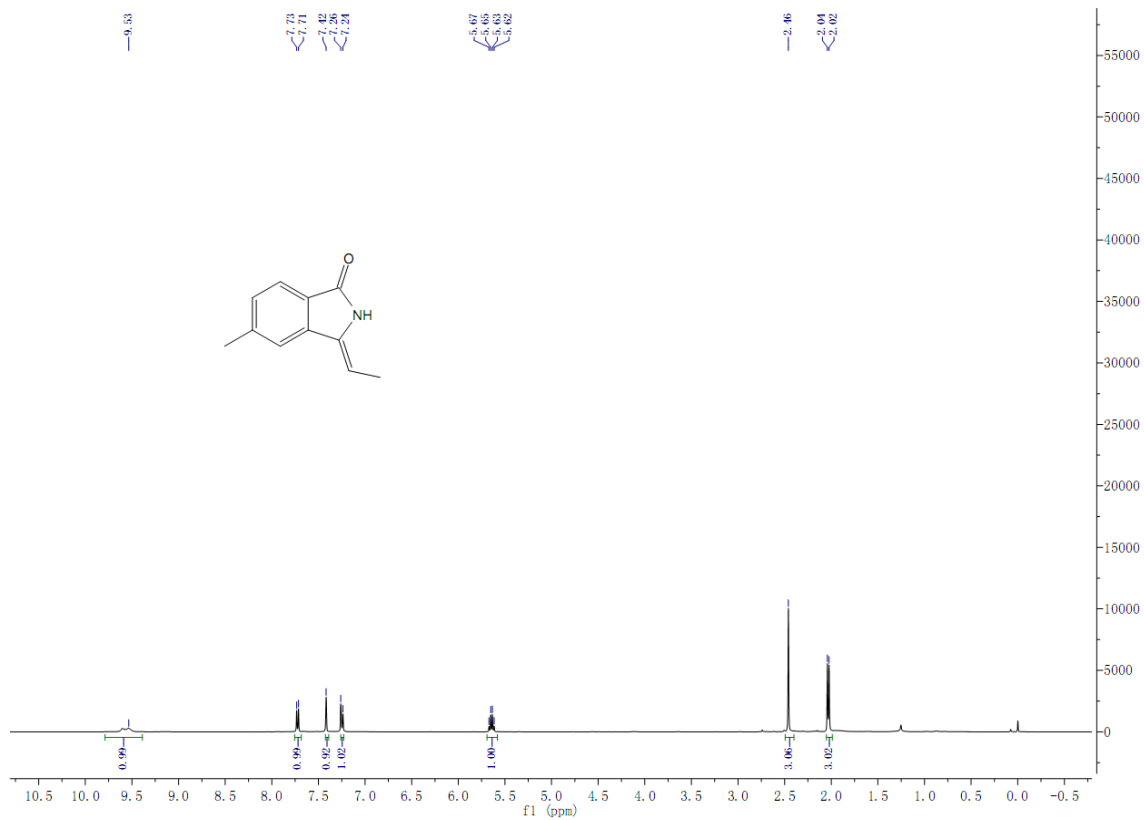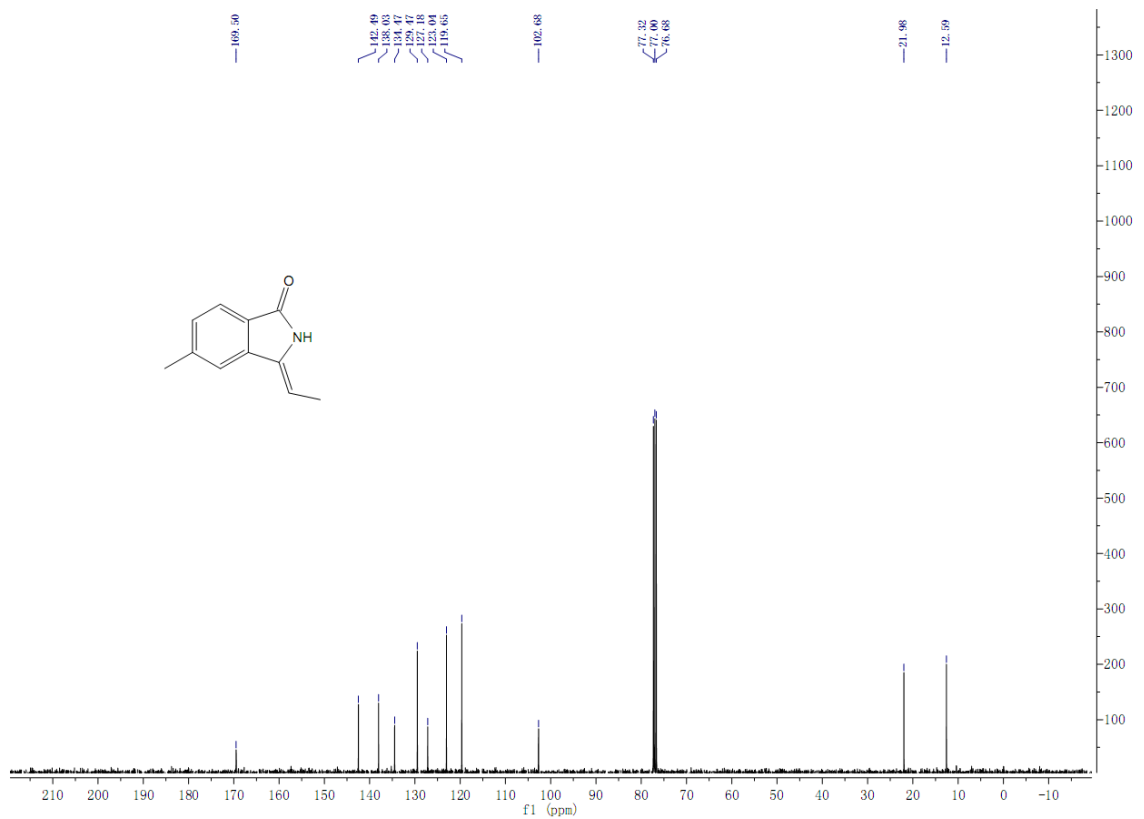

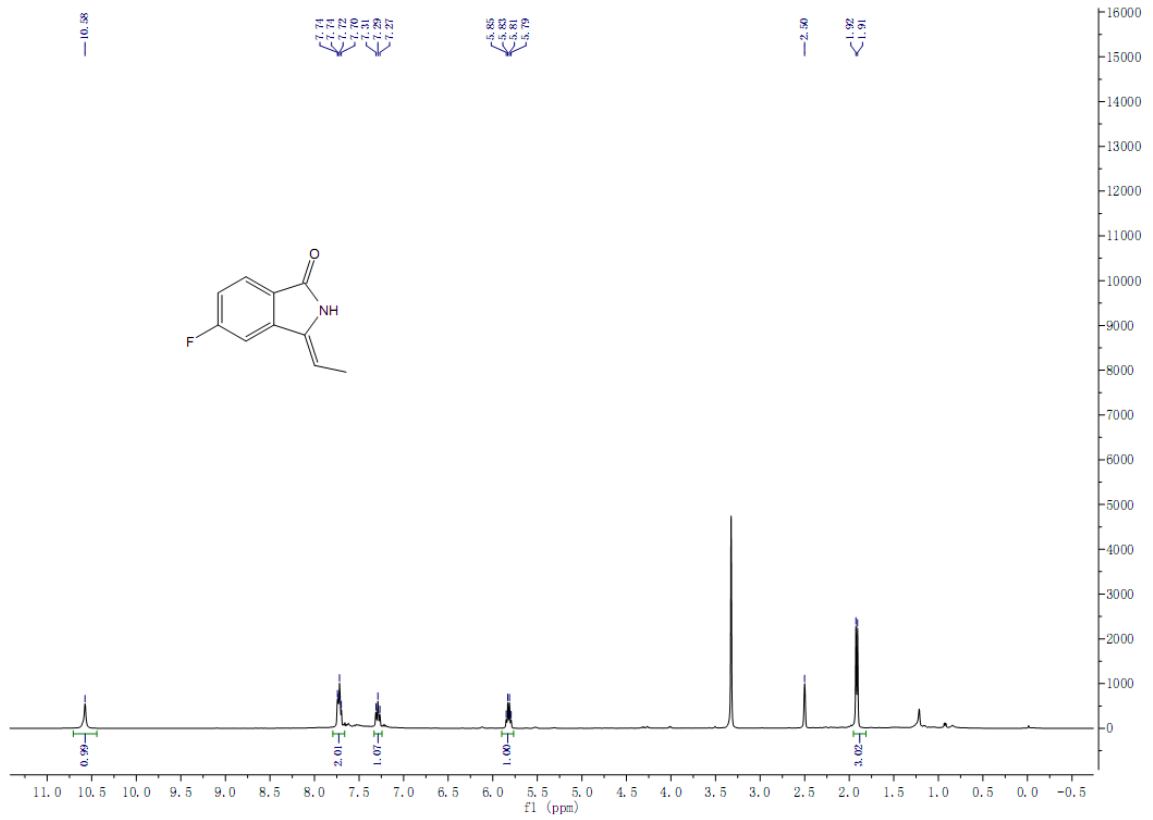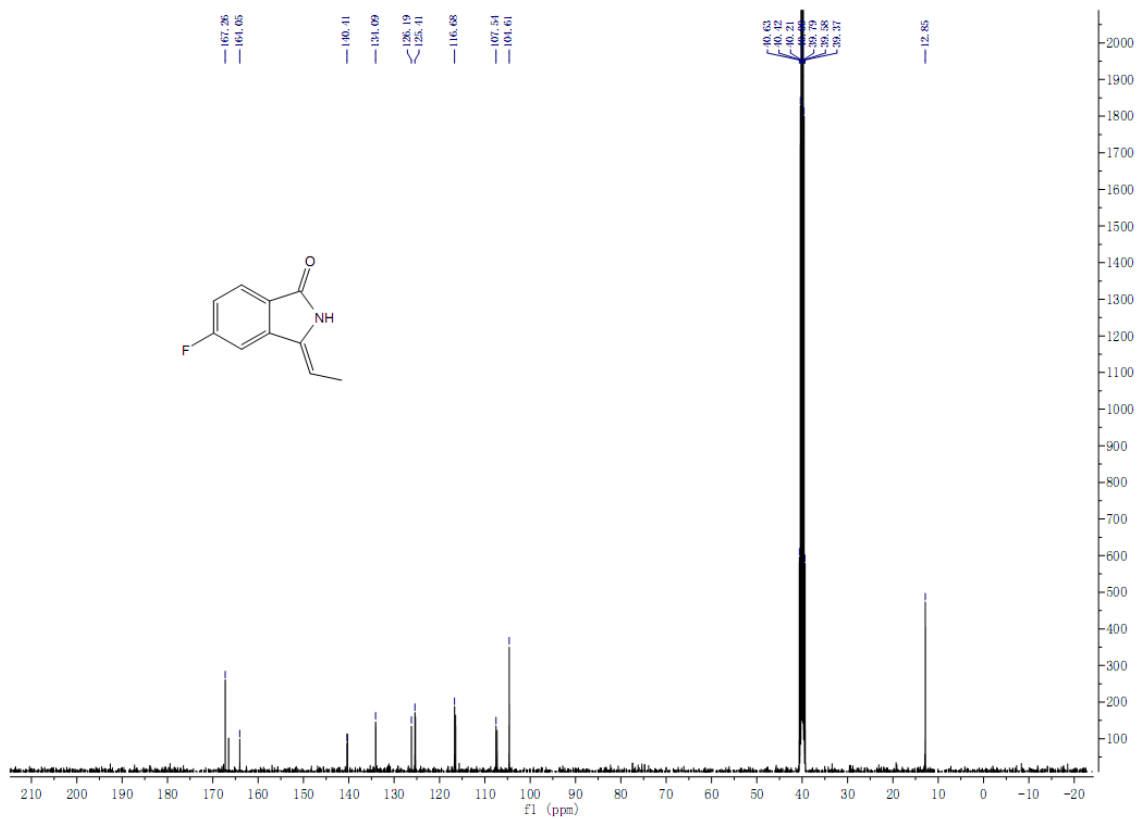

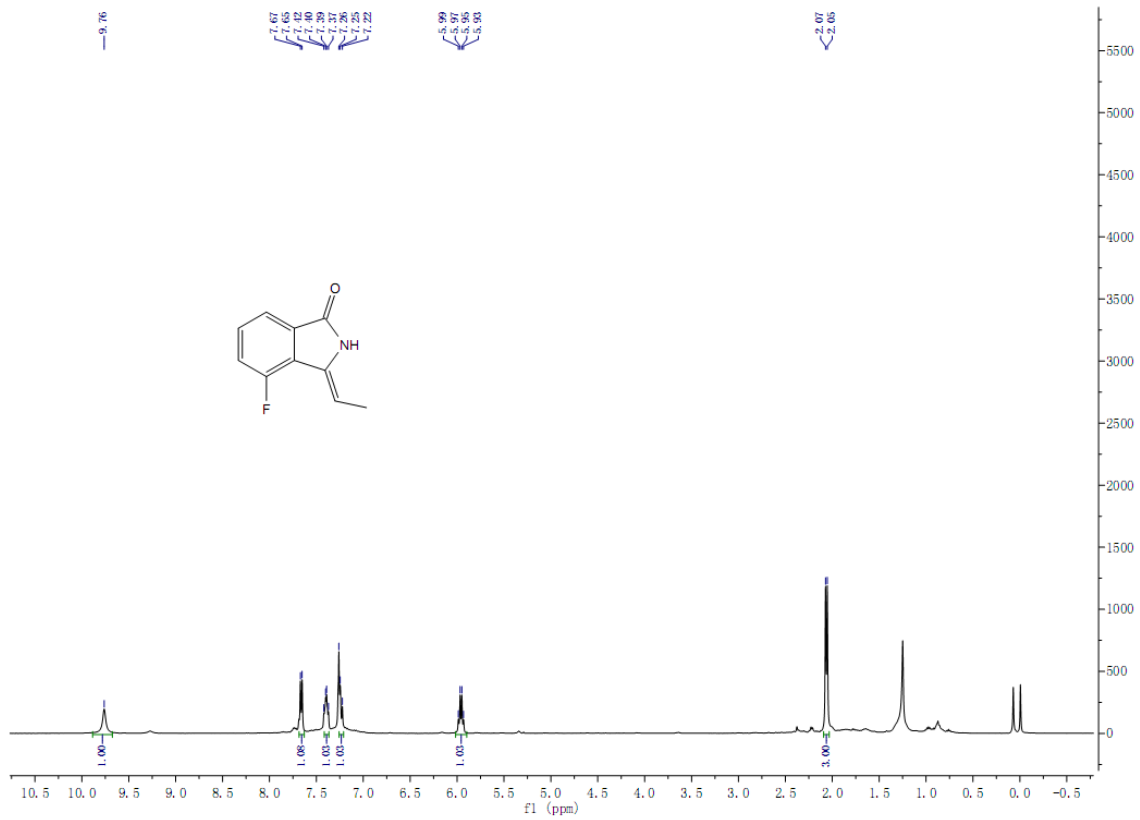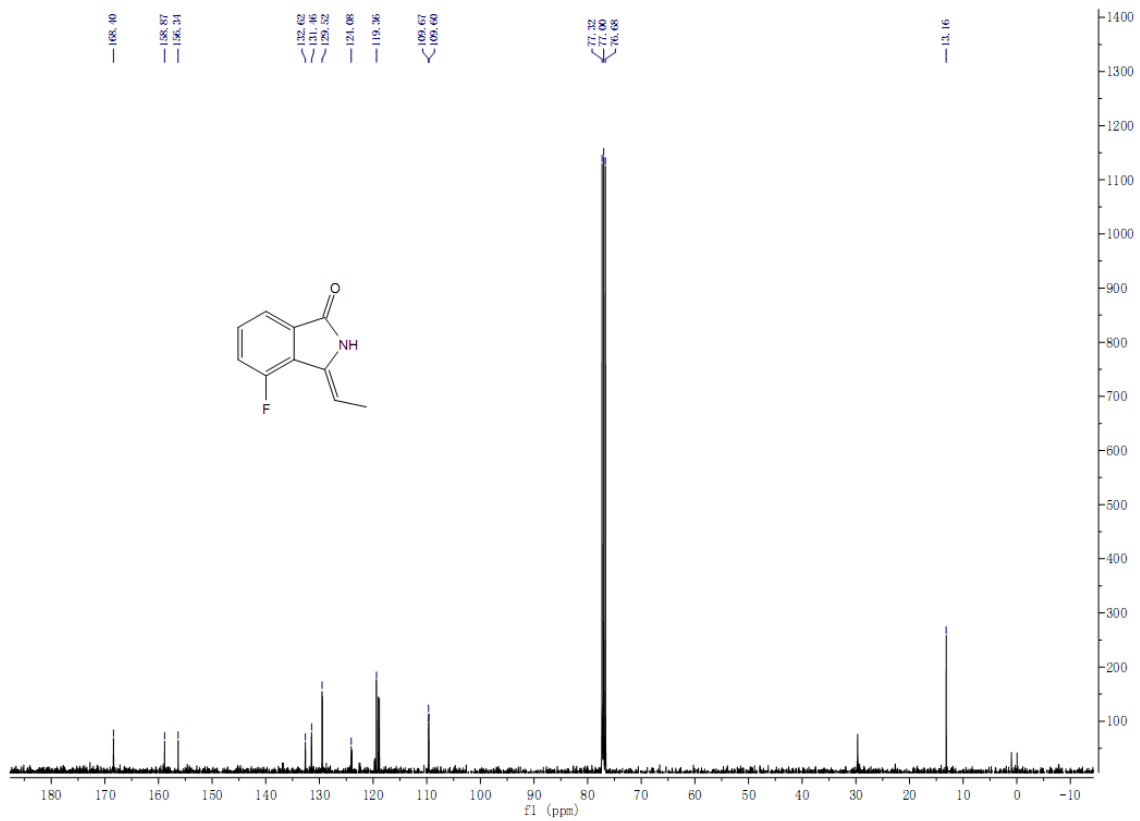

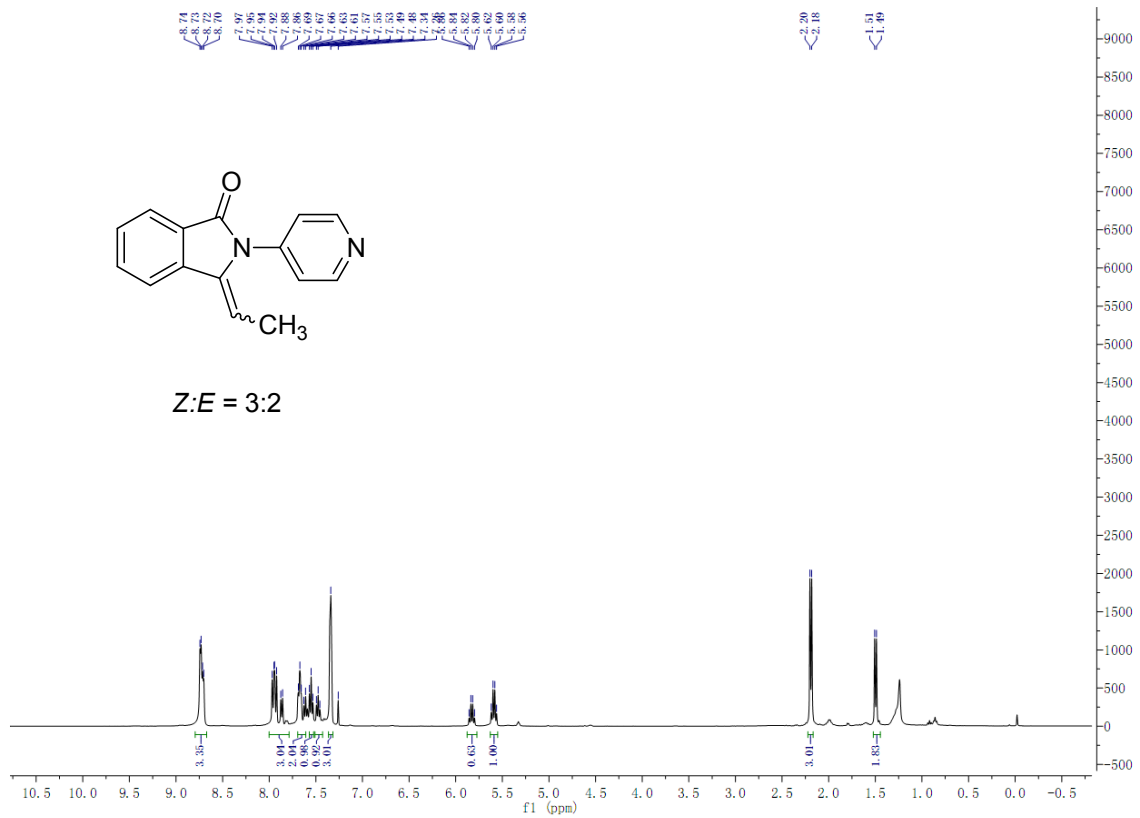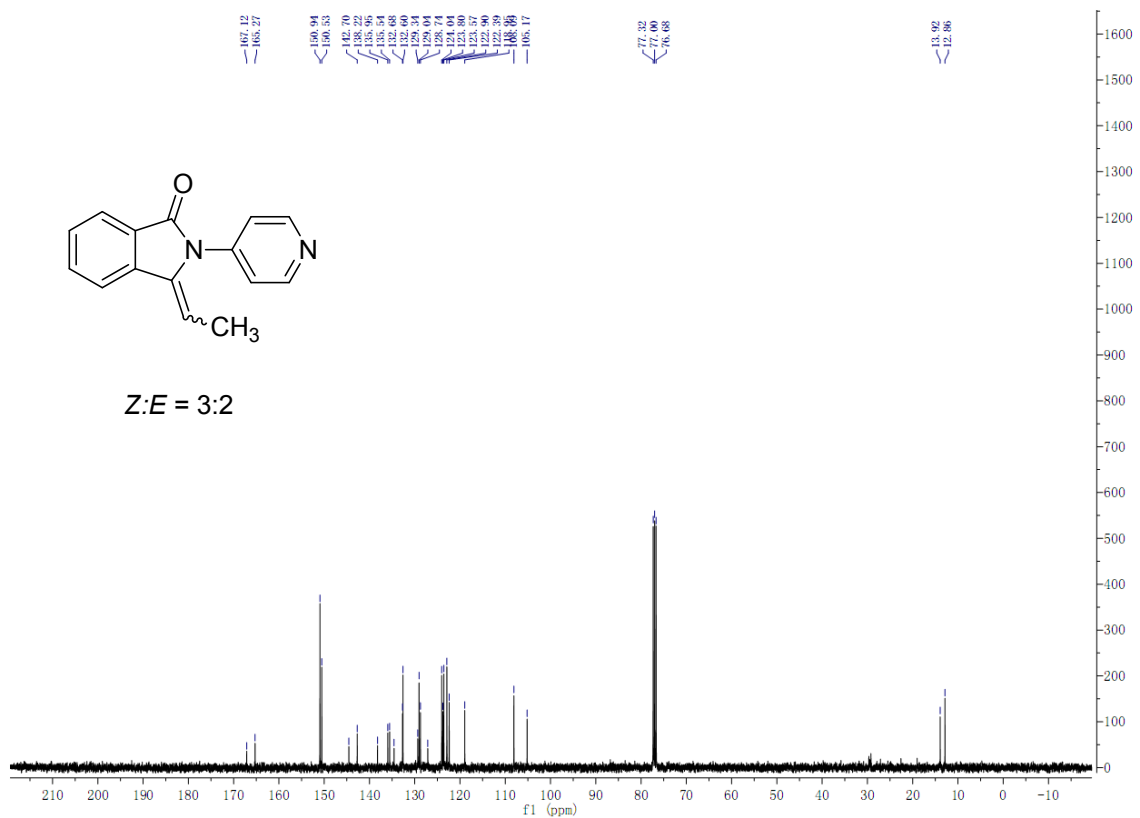

Supplement: c5cc01661d1.pdf [file c5cc01661d1.pdf]
